# Supplementary material for: Comment on “Multidimensional kinetic study on the organocatalyzed ring-opening polymerization (ROP) of l-lactide via a robotic high-throughput flow platform” by B. Zhang and T. Junkers, Chem. Sci., 2026, 17, 4706
Source: Royal Society of Chemistry journal article supplement (doi:10.1039/d6sc02040b), 2026-06-15
Supplement: d6sc02040b2.pdf [file d6sc02040b2.pdf]

**Comment on "Multidimensional kinetic study on the organocatalyzed ring-opening polymerization (ROP) of L-lactide via a robotic high-throughput flow platform" by B. Zhang and T. Junkers, *Chem. Sci.*, 2026, 17, 4706-4714**

Glenn Keith Kim Clothier and Simon Harrisson\*

Univ. Bordeaux, CNRS, Bordeaux INP, LCPO, UMR 5629, Pessac, F-33600 France

Email: [simon.harrisson@u-bordeaux.fr](mailto:simon.harrisson@u-bordeaux.fr)

### Cubic spline fitting

Cubic spline interpolators were generated from data points at 1 s, 5 s and 10 s (obtained from Tables S6-S14 and S17-S20 of Zhang and Junkers, *Chem. Sci.* 2026, **17**, 4706-4714). The curves consisted of two cubic sections and were constrained to have continuous first and second derivatives, pass through the point (0,0) corresponding to zero conversion ( $X$ ) at  $t = 0$ , and have a second derivative of zero at  $t = 10$  s.

The general formula for the spline interpolator is:

$$0 \leq t \leq 5 : X = f_1(t) = a_1t^3 + a_2t^2 + a_3t \#(S1a)$$

$$5 \leq t \leq 10 : X = f_2(t) = a_4t^3 + a_5t^2 + a_6t + a_7 \#(S1b)$$

This leads to a system of linear equations for the coefficients:

$$X_1 = f_1(1) = a_1 + a_2 + a_3 \#(S2a)$$

$$X_5 = f_1(5) = 125a_1 + 25a_2 + 5a_3 \#(S2b)$$

$$X_5 = f_2(5) = 125a_4 + 25a_5 + 5a_6 + a_7 \#(S2c)$$

$$X_{10} = f_2(10) = 1000a_4 + 100a_5 + 10a_6 + a_7 \#(S2d)$$

$$f_1'(5) - f_2'(5) = 75a_1 + 10a_2 + a_3 - 75a_4 - 10a_5 - a_6 = 0 \#(S2e)$$

$$f_1''(5) - f_2''(5) = 30a_1 + 2a_2 - 30a_4 - 2a_5 = 0 \#(S2f)$$

$$f_2''(10) = 60a_4 + 2a_5 = 0 \#(S2g)$$

Solving this system of equations gives each coefficient,  $a_i$ , as a linear combination of the experimental conversion values  $X_1$ ,  $X_5$ , and  $X_{10}$ , measured at  $t = 1, 5$  and  $10$  s:

$$a_i = c_{i1}X_1 + c_{i5}X_5 + c_{i10}X_{10} \#(S3)$$

The coefficients  $c_{i1}$ ,  $c_{i5}$ ,  $c_{i10}$  for calculation of  $a_1$ - $a_8$  are given in Table S1.

**Table S1:** Coefficients for calculation of cubic spline interpolator of conversions

| $a_i^a$ | $c_{i1}$ | $c_{i5}$ | $c_{i10}$ |
|---------|----------|----------|-----------|
| $a_1$   | 1/24     | -49/3000 | 1/250     |
| $a_2$   | -1/2     | 37/250   | -3/125    |
| $a_3$   | 35/24    | -79/600  | 1/50      |
| $a_4$   | -1/120   | 97/15000 | -3/1250   |
| $a_5$   | 1/4      | -97/500  | 9/125     |
| $a_6$   | -55/24   | 947/600  | -23/50    |
| $a_7$   | 25/4     | -57/20   | 4/5       |

<sup>a</sup>  $a_i = c_{i1}X_1 + c_{i5}X_5 + c_{i10}X_{10}$ ;  $X = a_1t^3 + a_2t^2 + a_3t$ , ( $0 \leq t \leq 5$ );  $X = a_4t^3 + a_5t^2 + a_6t + a_7$ , ( $5 \leq t \leq 10$ ).

The first derivative of the spline interpolator at  $t = 0$  is simply the coefficient  $a_3$ , equal to  $35X_1/24 - 79X_5/600 + X_{10}/50$ . Multiplying this value by the initial lactide concentration,  $[LLA]_0$ , gives the initial rate of monomer consumption,  $(d[LLA]/dt)_0$ .

## Regression analysis:

### 1. Determination of $k_{obs}$ (Figure 1, Tables S2-S14)

The apparent first-order rate constant,  $k_{obs}$ , was determined by weighted linear regression of the transformed conversion-time data ( $X_1, X_5, X_{10}$ , Tables S2-S14). Conversion data,  $X_i$ , were transformed to  $\xi_i$ , where  $\xi_i = -\ln(1-X_i)$ . When  $X_i = 100\%$ , it was set to 99.99% in order to allow calculation of  $k_{obs}$ . A weight matrix  $\mathbf{W}$  was defined as  $W_{ii} = (1-X_i)^2$ ,  $W_{ij} = 0$  ( $i \neq j$ ). The purpose of the weight matrix is to correct for distortions in the error structure introduced by the logarithmic transformation. The apparent rate constant was then calculated from equation:

$$k_{obs} = \frac{\sum_i t_i W_{ii} \xi_i}{\sum_i t_i W_{ii} t_i} \quad \#(S4)$$

### 2. Determination of overall reaction order (Figure 2, Figure S2)

The overall reaction order was determined by weighted linear regression of the logarithm of the initial rate ( $(-d[LLA]/dt)_0$ , Tables S3-S7) on the initial monomer concentration  $[LLA]_0$  for the monomer concentration sweep data. A weight matrix  $\mathbf{W}$  was defined as  $W_{ii} = (d[LLA]/dt)_0^2$ ,  $W_{ij} = 0$  ( $i \neq j$ ). The purpose of the weight matrix is to correct for distortions in the error structure introduced by the logarithmic transformation.

$$\begin{bmatrix} \log_{10} k \\ a \end{bmatrix} = (X^T W X)^{-1} X^T W Y \quad \#(S5)$$

Where  $\mathbf{X}$  is the information matrix whose entries are  $X_{i1} = 1$ ,  $X_{i2} = ([LLA]_0)_i$ , and  $\mathbf{Y}$  is the vector of initial rates  $Y_i = (\log_{10}(-d[LLA]/dt)_0)_i$ .

The results of this analysis are shown in Table S2.

**Table S2.** Regression to determine overall reaction order

| T (°C) | $\log_{10} k$ | $a$  | RMSE <sup>a</sup> |
|--------|---------------|------|-------------------|
| 35     | -0.196        | 1.98 | 0.011             |
| 30     | -0.083        | 1.91 | 0.010             |
| 20     | -0.051        | 2.05 | 0.009             |
| 10     | 0.002         | 1.57 | 0.018             |
| 0      | -0.015        | 1.33 | 0.017             |

$$RMSE = \sqrt{\frac{\sum_i \left( -\left(\frac{d[LLA]}{dt}\right)_{0i} - k[LLA]_{0i}^a \right)^2}{N-2}}$$

<sup>a</sup> RMSE is the root mean square error of the model, calculated as The number of data points,  $N$ , is 31.

### 3. Determination of reaction order in catalyst (Figure 3A) and initiator (Figure 3B)

The reaction order in catalyst was determined by multiple weighted linear regression of the logarithm of the initial rate  $(-d[LLA]/dt)_0$ , Tables S8-S11) on the initial monomer concentration  $[LLA]_0$  and the catalyst concentration for the catalyst-to-monomer ratio sweep data. A weight matrix  $\mathbf{W}$  was defined as  $W_{ii} = (d[LLA]/dt)_0^2$ ,  $W_{ij} = 0$  ( $i \neq j$ ). The purpose of the weight matrix is to correct for distortions in the error structure introduced by the logarithmic transformation.

The parameters of the model  $\ln R_p = \ln(k) + a \ln[LLA]_0 + b \ln[TBD]_0$  were determined from equation S6.

$$\begin{bmatrix} \ln(k) \\ a \\ b \end{bmatrix} = (X^T W X)^{-1} X^T W Y \quad \#(S6)$$

Where  $\mathbf{X}$  is the information matrix whose entries are  $X_{i1} = 1$ ,  $X_{i2} = ([LLA]_0)_i$ ,  $X_{i3} = ([TBD]_0)_i$ , and  $\mathbf{Y}$  is the vector of initial rates  $Y_i = (\ln(-d[LLA]/dt)_0)_i$ .

The best fit to the data was obtained with the following model (Figure 3A):

$$\left( -\frac{d[LLA]}{dt} \right)_0 = 10.4 \cdot [LLA]_0^{1.72} [TBD]_0^{0.39} \quad (84 \text{ data points, 3 parameters, RMSE} = 0.009)$$

A similar method was applied to the degree of polymerization sweep data (Tables S12-S15) to obtain the model (Figure 3B):

$$\left( -\frac{d[LLA]}{dt} \right)_0 = 4.56 \cdot [LLA]_0^{1.65} [MBA]_0^{0.42} \quad (84 \text{ data points, 3 parameters, RMSE} = 0.019)$$

In both cases, the RMSE was determined from the sum of squared residuals between the initial rate of reaction obtained from the spline fit, and the predicted rate of reaction,  $\left( -\frac{d[LLA]}{dt} \right)_0$ , divided by  $N-p$ , where  $N$  is the number of data points and  $p$  the number of parameters.

### 4. Determination of reaction order in monomer, catalyst and initiator (Figure 4A, Figure S2)

Weighted linear regression of the logarithm of the initial rate  $(-d[LLA]/dt)_0$ , Tables S3-S15) on the initial monomer concentration  $[LLA]_0$ , catalyst concentration  $[TBD]_0$  and initiator concentration  $[MBA]_0$  was carried out on all data. A weight matrix  $\mathbf{W}$  was defined as  $W_{ii} = (d[LLA]/dt)_0^2$ ,  $W_{ij} = 0$  ( $i \neq j$ ). The purpose of the weight matrix is to correct for distortions in the error structure introduced by the logarithmic transformation.

The parameters of the model  $\ln R_p = \ln(k) + a\ln[\text{LLA}]_0 + b\ln[\text{TBD}]_0 + c\ln[\text{MBA}]_0$  were determined from equation S7:

$$\begin{bmatrix} \ln(k) \\ a \\ b \\ c \end{bmatrix} = (X^T W X)^{-1} X^T W Y \quad \#(S7)$$

Where  $\mathbf{X}$  is the information matrix whose entries are  $X_{i1} = 1$ ,  $X_{i2} = ([\text{LLA}]_0)_i$ ,  $X_{i3} = ([\text{TBD}]_0)_i$ ,  $X_{i4} = ([\text{MBA}]_0)_i$ , and  $\mathbf{Y}$  is the vector of initial rates  $Y_i = (\ln(-d[\text{LLA}]/dt))_i$ .

The best fit to the data was obtained with the following model (Figure S2):

$$\left(-\frac{d[\text{LLA}]}{dt}\right)_0 = 4.59 \cdot [\text{LLA}]_0^{1.74} [\text{TBD}]_0^{0.17} [\text{MBA}]_0^{0.16} \quad (199 \text{ data points, 4 parameters, RMSE} = 0.041)$$

A significant improvement in the fit was obtained by allowing  $k$  to vary depending on the reaction series. This led to the following model:

$$\left(-\frac{d[\text{LLA}]}{dt}\right)_0 = k_i \cdot [\text{LLA}]_0^{1.32} [\text{TBD}]_0^{0.44} [\text{MBA}]_0^{0.35} \quad (199 \text{ data points, 5 parameters, RMSE} = 0.017)$$

The values of  $k_i$  are  $k_1$  (monomer concentration sweep and degree of polymerization sweep) : 44.6;  $k_2$  (catalyst-to-monomer ratio sweep) : 69.3.

In both cases, the RMSE was determined from the sum of squared residuals between the initial rate of reaction obtained from the spline fit, and the predicted rate of reaction,  $\left(-\frac{d[\text{LLA}]}{dt}\right)_0$ , divided by  $N-p$ , where  $N$  is the number of data points and  $p$  the number of parameters.

### 5. Fixed reaction order in monomer, catalyst and initiator (Figure 4B, Figure 4C)

The data were also fit to a model in which the order in monomer was fixed to 1, and the order in catalyst and initiator were fixed to 0.5. Again,  $k$  was allowed to vary depending on the reaction series. The following model was obtained:

$$\left(-\frac{d[\text{LLA}]}{dt}\right)_0 = k_i \cdot [\text{LLA}]_0 [\text{TBD}]_0^{0.5} [\text{MBA}]_0^{0.5} \quad (199 \text{ data points, 2 parameters, RMSE} = 0.020)$$

The values of  $k_i$  are  $k_1$  (monomer concentration sweep and degree of polymerization sweep) :  $116 \text{ M}^{-1}\cdot\text{s}^{-1}$ ;  $k_2$  (catalyst-to-monomer ratio sweep) :  $191 \text{ M}^{-1}\cdot\text{s}^{-1}$ .

Finally, the model proposed by Zhang and Junkers<sup>1</sup> was fit to the data: in this model the order in monomer and catalyst is set to 1, and the order in initiator is set to 0.5. Again,  $k$  was allowed to vary depending on the reaction series. The following model was obtained:

$$\left(-\frac{d[\text{LLA}]}{dt}\right)_0 = k_i \cdot [\text{LLA}]_0 [\text{TBD}]_0 [\text{MBA}]_0^{0.5} \quad (199 \text{ data points, 2 parameters, RMSE} = 0.060)$$

The values of  $k_i$  are  $k_1$  (monomer concentration sweep and degree of polymerization sweep) :  $2279 \text{ M}^{-1.5}\cdot\text{s}^{-1}$ ;  $k_2$  (catalyst-to-monomer ratio sweep) :  $5312 \text{ M}^{-1.5}\cdot\text{s}^{-1}$ .

In both cases, the RMSE was determined from the sum of squared residuals between the initial rate of reaction obtained from the spline fit, and the predicted rate of reaction,  $\left(-\frac{d[\text{LLA}]}{dt}\right)_0$ , divided by  $N-p$ , where  $N$  is the number of data points and  $p$  the number of parameters.

## 6. First-order model incorporating a reversible propagation step (Figure S3, Figure S4)

The kinetics of a polymerization with a reversible propagation step in which the forward reaction is first order in monomer are described by equation S8:

$$R_p = -\frac{d[M]}{dt} = k_p[M][P^*] - k_{dp}[P^*] \quad \#(S8)$$

In this equation, M represents the monomer and P\* the propagating species.

Integrating this equation and setting  $[LLA]_{eq} = k_{dp}/k_p$  and  $k_{obs} = k_p[P^*]$  gives equation S9, relating conversion, X, to time, t :

$$X = \left(1 - \frac{[LLA]_{eq}}{[LLA]_0}\right) (1 - \exp(-k_{obs}t)) \quad \#(S9)$$

The conversion data obtained from the monomer sweep experiments at 35°C (Table S3) were fit to this model using nonlinear least squares regression. Selected examples of the fit are shown in Figure S3, and the values thus obtained for  $[M]_{eq}$  and  $k_{obs}$  are plotted in Figure S4, and tabulated in Table S16.

## 7. Correction of initial rates to compensate for depolymerization

Evaluating equation S8 at t = 0,  $[M] = [LLA]_0$  gives equation S10:

$$(R_p)_0 = -\left(\frac{d[LLA]}{dt}\right)_0 = k_p[LLA]_0[P^*]_0 - k_{dp}[P^*]_0 = k_p[P^*]_0([LLA]_0 - [LLA]_{eq}) \quad \#(S10)$$

Setting  $[P^*] \sim [LLA]^{a-1}[TBD]^b[MBA]^c$ , this gives the corrected rate equation S11:

$$(R_{p,corrected})_0 = -\frac{[LLA]_0}{([LLA]_0 - [LLA]_{eq})} \left(\frac{d[LLA]}{dt}\right)_0 = k_p[P^*]_0[M]_0 = k[LLA]_0^a[TBD]_0^b[MBA]_0^c \quad \#(S11)$$

Thus the contribution of depolymerization to the observed rate can be compensated for by multiplying the rate of monomer consumption by a correction factor,  $[LLA]_0/([LLA]_0 - [LLA]_{eq})$ .

Equilibrium concentrations  $[LLA]_{eq}$  at 0, 10, 20, 30 and 35°C were estimated from the data of Cederholm et al. (L. Cederholm, J. Wohler, P. Olsén, M. Hakkarainen and K. Odellius, *Angew. Chem. Int. Ed.* 2022, **61**, e202204531), obtained at 55-85°C in dioxane solution using DBU as catalyst, and are given in Table S18.

**Table S3.** Initial rate of monomer consumption,  $k_{obs}$  and depolymerization-corrected rate of monomer consumption for monomer concentration sweep data at 35°C

| [LLA] <sub>0</sub><br>(M) <sup>a</sup> | [MBA] <sub>0</sub><br>(mM) <sup>a</sup> | [TBD] <sub>0</sub><br>(mM) <sup>a</sup> | X <sub>1</sub><br>(%) <sup>a</sup> | X <sub>5</sub><br>(%) <sup>a</sup> | X <sub>10</sub><br>(%) <sup>a</sup> | $\left(\frac{dX}{dt}\right)_0$<br>(s <sup>-1</sup> ) <sup>b</sup> | $\left(\frac{-d[LLA]}{dt}\right)$<br>(M·s <sup>-1</sup> ) <sup>c</sup> | $k_{obs}$<br>(s <sup>-1</sup> ) <sup>d</sup> | $k_{obs}[LLA]_0$<br>(M·s <sup>-1</sup> ) <sup>e</sup> | correction<br>factor <sup>f</sup> | (R <sub>p,corr</sub> ) <sub>0</sub><br>(M·s <sup>-1</sup> ) <sup>g</sup> |
|----------------------------------------|-----------------------------------------|-----------------------------------------|------------------------------------|------------------------------------|-------------------------------------|-------------------------------------------------------------------|------------------------------------------------------------------------|----------------------------------------------|-------------------------------------------------------|-----------------------------------|--------------------------------------------------------------------------|
| 0.20                                   | 2.0                                     | 1.0                                     | 12.47                              | 20.36                              | 25.40                               | 0.1601                                                            | 0.0320                                                                 | 0.0340                                       | 0.0068                                                | 1.283                             | 0.0411                                                                   |
| 0.22                                   | 2.2                                     | 1.1                                     | 14.42                              | 25.33                              | 28.94                               | 0.1827                                                            | 0.0402                                                                 | 0.0407                                       | 0.0090                                                | 1.251                             | 0.0503                                                                   |
| 0.24                                   | 2.4                                     | 1.2                                     | 16.16                              | 28.44                              | 32.20                               | 0.2047                                                            | 0.0491                                                                 | 0.0465                                       | 0.0112                                                | 1.225                             | 0.0602                                                                   |
| 0.26                                   | 2.6                                     | 1.3                                     | 15.56                              | 30.77                              | 35.82                               | 0.1936                                                            | 0.0503                                                                 | 0.0525                                       | 0.0136                                                | 1.204                             | 0.0606                                                                   |
| 0.28                                   | 2.8                                     | 1.4                                     | 16.02                              | 35.96                              | 39.32                               | 0.1941                                                            | 0.0544                                                                 | 0.0602                                       | 0.0169                                                | 1.187                             | 0.0645                                                                   |
| 0.30                                   | 3.0                                     | 1.5                                     | 18.13                              | 41.53                              | 42.64                               | 0.2182                                                            | 0.0655                                                                 | 0.0684                                       | 0.0205                                                | 1.172                             | 0.0768                                                                   |
| 0.32                                   | 3.2                                     | 1.6                                     | 17.39                              | 43.23                              | 46.85                               | 0.2061                                                            | 0.0659                                                                 | 0.0765                                       | 0.0245                                                | 1.160                             | 0.0765                                                                   |
| 0.34                                   | 3.4                                     | 1.7                                     | 18.37                              | 48.06                              | 50.95                               | 0.2148                                                            | 0.0730                                                                 | 0.0868                                       | 0.0295                                                | 1.149                             | 0.0839                                                                   |
| 0.36                                   | 3.6                                     | 1.8                                     | 18.62                              | 47.64                              | 55.29                               | 0.2199                                                            | 0.0792                                                                 | 0.0957                                       | 0.0345                                                | 1.140                             | 0.0902                                                                   |
| 0.38                                   | 3.8                                     | 1.9                                     | 18.46                              | 49.86                              | 60.00                               | 0.2156                                                            | 0.0819                                                                 | 0.1076                                       | 0.0409                                                | 1.131                             | 0.0927                                                                   |
| 0.40                                   | 4.0                                     | 2.0                                     | 19.88                              | 56.21                              | 63.50                               | 0.2286                                                            | 0.0914                                                                 | 0.1214                                       | 0.0485                                                | 1.124                             | 0.1028                                                                   |
| 0.42                                   | 4.2                                     | 2.1                                     | 22.33                              | 59.65                              | 65.62                               | 0.2602                                                            | 0.1093                                                                 | 0.1306                                       | 0.0548                                                | 1.117                             | 0.1221                                                                   |
| 0.44                                   | 4.4                                     | 2.2                                     | 23.06                              | 60.86                              | 68.60                               | 0.2699                                                            | 0.1187                                                                 | 0.1411                                       | 0.0621                                                | 1.111                             | 0.1320                                                                   |
| 0.46                                   | 4.6                                     | 2.3                                     | 22.09                              | 63.79                              | 72.52                               | 0.2527                                                            | 0.1162                                                                 | 0.1568                                       | 0.0721                                                | 1.106                             | 0.1285                                                                   |
| 0.48                                   | 4.8                                     | 2.4                                     | 24.27                              | 64.10                              | 76.01                               | 0.2847                                                            | 0.1367                                                                 | 0.1718                                       | 0.0825                                                | 1.101                             | 0.1505                                                                   |
| 0.50                                   | 5.0                                     | 2.5                                     | 26.17                              | 66.66                              | 81.01                               | 0.3101                                                            | 0.1550                                                                 | 0.1984                                       | 0.0992                                                | 1.097                             | 0.1700                                                                   |
| 0.52                                   | 5.2                                     | 2.6                                     | 27.29                              | 69.95                              | 84.98                               | 0.3229                                                            | 0.1679                                                                 | 0.2259                                       | 0.1175                                                | 1.093                             | 0.1835                                                                   |
| 0.54                                   | 5.4                                     | 2.7                                     | 28.35                              | 71.67                              | 86.29                               | 0.3363                                                            | 0.1816                                                                 | 0.2388                                       | 0.1290                                                | 1.089                             | 0.1978                                                                   |
| 0.56                                   | 5.6                                     | 2.8                                     | 27.76                              | 75.58                              | 88.07                               | 0.3229                                                            | 0.1808                                                                 | 0.2598                                       | 0.1455                                                | 1.085                             | 0.1963                                                                   |
| 0.58                                   | 5.8                                     | 2.9                                     | 30.05                              | 76.82                              | 88.76                               | 0.3548                                                            | 0.2058                                                                 | 0.2725                                       | 0.1581                                                | 1.082                             | 0.2227                                                                   |
| 0.60                                   | 6.0                                     | 3.0                                     | 33.49                              | 76.90                              | 89.59                               | 0.4051                                                            | 0.2430                                                                 | 0.2855                                       | 0.1713                                                | 1.079                             | 0.2623                                                                   |
| 0.62                                   | 6.2                                     | 3.1                                     | 34.36                              | 79.91                              | 91.12                               | 0.4141                                                            | 0.2567                                                                 | 0.3124                                       | 0.1937                                                | 1.077                             | 0.2764                                                                   |
| 0.64                                   | 6.4                                     | 3.2                                     | 33.82                              | 83.51                              | 92.50                               | 0.4018                                                            | 0.2571                                                                 | 0.3402                                       | 0.2177                                                | 1.074                             | 0.2761                                                                   |
| 0.66                                   | 6.6                                     | 3.3                                     | 34.62                              | 84.64                              | 93.38                               | 0.4121                                                            | 0.2720                                                                 | 0.3584                                       | 0.2365                                                | 1.072                             | 0.2915                                                                   |
| 0.68                                   | 6.8                                     | 3.4                                     | 36.66                              | 85.76                              | 94.39                               | 0.4406                                                            | 0.2996                                                                 | 0.3856                                       | 0.2622                                                | 1.069                             | 0.3204                                                                   |
| 0.70                                   | 7.0                                     | 3.5                                     | 39.32                              | 87.95                              | 95.46                               | 0.4767                                                            | 0.3337                                                                 | 0.4281                                       | 0.2997                                                | 1.067                             | 0.3561                                                                   |
| 0.72                                   | 7.2                                     | 3.6                                     | 39.75                              | 89.49                              | 97.47                               | 0.4814                                                            | 0.3466                                                                 | 0.4720                                       | 0.3398                                                | 1.065                             | 0.3692                                                                   |
| 0.74                                   | 7.4                                     | 3.7                                     | 39.59                              | 89.99                              | 99.49                               | 0.4788                                                            | 0.3543                                                                 | 0.4864                                       | 0.3599                                                | 1.063                             | 0.3767                                                                   |
| 0.76                                   | 7.6                                     | 3.8                                     | 41.03                              | 90.74                              | 99.46                               | 0.4988                                                            | 0.3791                                                                 | 0.5083                                       | 0.3863                                                | 1.062                             | 0.4024                                                                   |
| 0.78                                   | 7.8                                     | 3.9                                     | 42.89                              | 92.09                              | 98.22                               | 0.5239                                                            | 0.4086                                                                 | 0.5344                                       | 0.4169                                                | 1.060                             | 0.4331                                                                   |
| 0.80                                   | 8.0                                     | 4.0                                     | 43.11                              | 93.10                              | 98.51                               | 0.5258                                                            | 0.4206                                                                 | 0.5497                                       | 0.4398                                                | 1.058                             | 0.4452                                                                   |

<sup>a</sup> Data from Table S6, Zhang and Junkers, *Chem. Sci.* 2026, **17**, 4706-4714. <sup>b</sup> Derivative of cubic spline

interpolator of conversion data at  $t = 0$ . <sup>c</sup>  $\left(\frac{d[LLA]}{dt}\right)_0 = \left(\frac{dX}{dt}\right)_0 \cdot [LLA]_0$ . <sup>d</sup> Apparent first-order rate constant

obtained by fitting  $\hat{X} = 1 - \exp(-k_{obs}t)$  to conversion data. <sup>e</sup> Initial rate of monomer consumption

predicted from  $k_{obs}$ . <sup>f</sup> Correction factor =  $[LLA]_0 / ([LLA]_0 - [LLA]_{eq})$ ;  $[LLA]_{eq} = 0.0441$  M (Table S18). <sup>g</sup> Corrected  $(R_p)_0$  to remove contribution from depolymerization:  $(R_{p,corr})_0 = -d([LLA]/dt)_0 \times [LLA]_0 / ([LLA]_0 - [LLA]_{eq})$ .

**Table S4.** Initial rate of monomer consumption,  $k_{obs}$  and depolymerization-corrected rate of monomer consumption for monomer concentration sweep data at 30°C

| [LLA] <sub>0</sub><br>(M) <sup>a</sup> | [MBA] <sub>0</sub><br>(mM) <sup>a</sup> | [TBD] <sub>0</sub><br>(mM) <sup>a</sup> | X <sub>1</sub><br>(%) <sup>a</sup> | X <sub>5</sub><br>(%) <sup>a</sup> | X <sub>10</sub><br>(%) <sup>a</sup> | $\left(\frac{dX}{dt}\right)_0$<br>(s <sup>-1</sup> ) <sup>b</sup> | $\left(\frac{-d[LLA]}{dt}\right)_0$<br>(M·s <sup>-1</sup> ) <sup>c</sup> | $k_{obs}$<br>(s <sup>-1</sup> ) <sup>d</sup> | $k_{obs}[LLA]_0$<br>(M·s <sup>-1</sup> ) <sup>e</sup> | correction<br>factor <sup>f</sup> | (R <sub>p,corr</sub> ) <sub>0</sub><br>(M·s <sup>-1</sup> ) <sup>g</sup> |
|----------------------------------------|-----------------------------------------|-----------------------------------------|------------------------------------|------------------------------------|-------------------------------------|-------------------------------------------------------------------|--------------------------------------------------------------------------|----------------------------------------------|-------------------------------------------------------|-----------------------------------|--------------------------------------------------------------------------|
| 0.20                                   | 2.0                                     | 1.0                                     | 12.40                              | 31.04                              | 41.73                               | 0.1483                                                            | 0.0297                                                                   | 0.0605                                       | 0.0121                                                | 1.250                             | 0.0371                                                                   |
| 0.22                                   | 2.2                                     | 1.1                                     | 15.07                              | 31.89                              | 43.56                               | 0.1865                                                            | 0.0410                                                                   | 0.0641                                       | 0.0141                                                | 1.222                             | 0.0501                                                                   |
| 0.24                                   | 2.4                                     | 1.2                                     | 16.64                              | 32.82                              | 45.72                               | 0.2086                                                            | 0.0501                                                                   | 0.0682                                       | 0.0164                                                | 1.200                             | 0.0601                                                                   |
| 0.26                                   | 2.6                                     | 1.3                                     | 16.93                              | 34.98                              | 49.38                               | 0.2107                                                            | 0.0548                                                                   | 0.0754                                       | 0.0196                                                | 1.182                             | 0.0647                                                                   |
| 0.28                                   | 2.8                                     | 1.4                                     | 18.10                              | 37.27                              | 52.49                               | 0.2254                                                            | 0.0631                                                                   | 0.0826                                       | 0.0231                                                | 1.167                             | 0.0736                                                                   |
| 0.30                                   | 3.0                                     | 1.5                                     | 21.12                              | 38.57                              | 55.76                               | 0.2684                                                            | 0.0805                                                                   | 0.0899                                       | 0.0270                                                | 1.154                             | 0.0929                                                                   |
| 0.32                                   | 3.2                                     | 1.6                                     | 23.78                              | 39.95                              | 62.45                               | 0.3067                                                            | 0.0981                                                                   | 0.1037                                       | 0.0332                                                | 1.143                             | 0.1122                                                                   |
| 0.34                                   | 3.4                                     | 1.7                                     | 25.22                              | 41.27                              | 67.28                               | 0.3269                                                            | 0.1111                                                                   | 0.1145                                       | 0.0389                                                | 1.133                             | 0.1260                                                                   |
| 0.36                                   | 3.6                                     | 1.8                                     | 27.21                              | 42.75                              | 70.75                               | 0.3547                                                            | 0.1277                                                                   | 0.1235                                       | 0.0445                                                | 1.125                             | 0.1436                                                                   |
| 0.38                                   | 3.8                                     | 1.9                                     | 28.66                              | 49.06                              | 74.89                               | 0.3683                                                            | 0.1400                                                                   | 0.1442                                       | 0.0548                                                | 1.118                             | 0.1564                                                                   |
| 0.40                                   | 4.0                                     | 2.0                                     | 29.91                              | 56.16                              | 77.78                               | 0.3778                                                            | 0.1511                                                                   | 0.1671                                       | 0.0668                                                | 1.111                             | 0.1679                                                                   |
| 0.42                                   | 4.2                                     | 2.1                                     | 31.45                              | 60.34                              | 78.51                               | 0.3949                                                            | 0.1659                                                                   | 0.1790                                       | 0.0752                                                | 1.105                             | 0.1833                                                                   |
| 0.44                                   | 4.4                                     | 2.2                                     | 32.14                              | 64.80                              | 79.79                               | 0.3993                                                            | 0.1757                                                                   | 0.1935                                       | 0.0851                                                | 1.100                             | 0.1933                                                                   |
| 0.46                                   | 4.6                                     | 2.3                                     | 33.06                              | 65.86                              | 80.76                               | 0.4116                                                            | 0.1893                                                                   | 0.2005                                       | 0.0922                                                | 1.095                             | 0.2074                                                                   |
| 0.48                                   | 4.8                                     | 2.4                                     | 34.03                              | 67.08                              | 80.70                               | 0.4241                                                            | 0.2036                                                                   | 0.2032                                       | 0.0975                                                | 1.091                             | 0.2221                                                                   |
| 0.50                                   | 5.0                                     | 2.5                                     | 34.82                              | 68.86                              | 82.70                               | 0.4337                                                            | 0.2168                                                                   | 0.2178                                       | 0.1089                                                | 1.087                             | 0.2357                                                                   |
| 0.52                                   | 5.2                                     | 2.6                                     | 36.56                              | 70.65                              | 84.01                               | 0.4569                                                            | 0.2376                                                                   | 0.2308                                       | 0.1200                                                | 1.083                             | 0.2574                                                                   |
| 0.54                                   | 5.4                                     | 2.7                                     | 38.73                              | 71.99                              | 83.72                               | 0.4868                                                            | 0.2629                                                                   | 0.2334                                       | 0.1261                                                | 1.080                             | 0.2839                                                                   |
| 0.56                                   | 5.6                                     | 2.8                                     | 39.60                              | 72.50                              | 86.31                               | 0.4993                                                            | 0.2796                                                                   | 0.2530                                       | 0.1417                                                | 1.077                             | 0.3011                                                                   |
| 0.58                                   | 5.8                                     | 2.9                                     | 41.03                              | 74.05                              | 87.35                               | 0.5183                                                            | 0.3006                                                                   | 0.2668                                       | 0.1547                                                | 1.074                             | 0.3229                                                                   |
| 0.60                                   | 6.0                                     | 3.0                                     | 42.32                              | 74.89                              | 86.52                               | 0.5359                                                            | 0.3215                                                                   | 0.2638                                       | 0.1583                                                | 1.071                             | 0.3445                                                                   |
| 0.62                                   | 6.2                                     | 3.1                                     | 43.81                              | 76.25                              | 84.67                               | 0.5554                                                            | 0.3444                                                                   | 0.2523                                       | 0.1564                                                | 1.069                             | 0.3681                                                                   |
| 0.64                                   | 6.4                                     | 3.2                                     | 44.19                              | 77.35                              | 84.43                               | 0.5595                                                            | 0.3581                                                                   | 0.2522                                       | 0.1614                                                | 1.067                             | 0.3819                                                                   |
| 0.66                                   | 6.6                                     | 3.3                                     | 44.49                              | 78.67                              | 86.52                               | 0.5625                                                            | 0.3713                                                                   | 0.2749                                       | 0.1815                                                | 1.065                             | 0.3952                                                                   |
| 0.68                                   | 6.8                                     | 3.4                                     | 47.23                              | 82.42                              | 87.95                               | 0.5978                                                            | 0.4065                                                                   | 0.3012                                       | 0.2048                                                | 1.063                             | 0.4319                                                                   |
| 0.70                                   | 7.0                                     | 3.5                                     | 47.80                              | 84.16                              | 88.07                               | 0.6039                                                            | 0.4227                                                                   | 0.3060                                       | 0.2142                                                | 1.061                             | 0.4483                                                                   |
| 0.72                                   | 7.2                                     | 3.6                                     | 48.18                              | 85.08                              | 88.69                               | 0.6083                                                            | 0.4380                                                                   | 0.3170                                       | 0.2283                                                | 1.059                             | 0.4638                                                                   |
| 0.74                                   | 7.4                                     | 3.7                                     | 49.60                              | 88.59                              | 89.55                               | 0.6246                                                            | 0.4622                                                                   | 0.3362                                       | 0.2488                                                | 1.057                             | 0.4886                                                                   |
| 0.76                                   | 7.6                                     | 3.8                                     | 50.37                              | 92.21                              | 90.86                               | 0.6313                                                            | 0.4798                                                                   | 0.3647                                       | 0.2772                                                | 1.056                             | 0.5065                                                                   |
| 0.78                                   | 7.8                                     | 3.9                                     | 50.11                              | 92.84                              | 93.30                               | 0.6272                                                            | 0.4892                                                                   | 0.4383                                       | 0.3419                                                | 1.054                             | 0.5157                                                                   |
| 0.80                                   | 8.0                                     | 4.0                                     | 50.61                              | 92.32                              | 96.35                               | 0.6358                                                            | 0.5086                                                                   | 0.5564                                       | 0.4451                                                | 1.053                             | 0.5354                                                                   |

<sup>a</sup> Data from Table S7, Zhang and Junkers, *Chem. Sci.* 2026, **17**, 4706-4714. <sup>b</sup> Derivative of cubic spline

interpolator of conversion data at  $t = 0$ . <sup>c</sup>  $\left(\frac{d[LLA]}{dt}\right)_0 = \left(\frac{dX}{dt}\right)_0 \cdot [LLA]_0$ . <sup>d</sup> Apparent first-order rate constant

obtained by fitting  $\hat{X} = 1 - \exp(-k_{obs}t)$  to conversion data. <sup>e</sup> Initial rate of monomer consumption

predicted from  $k_{obs}$ . <sup>f</sup> Correction factor =  $[LLA]_0 / ([LLA]_0 - [LLA]_{eq})$ ;  $[LLA]_{eq} = 0.0400$  M (Table S18). <sup>g</sup> Corrected  $(R_p)_0$  to remove contribution from depolymerization:  $(R_{p,corr})_0 = -(d[LLA]/dt)_0 \times [LLA]_0 / ([LLA]_0 - [LLA]_{eq})$ .

**Table S5.** Initial rate of monomer consumption,  $k_{obs}$  and depolymerization-corrected rate of monomer consumption for monomer concentration sweep data at 20°C

| [LLA] <sub>0</sub><br>(M) <sup>a</sup> | [MBA] <sub>0</sub><br>(mM) <sup>a</sup> | [TBD] <sub>0</sub><br>(mM) <sup>a</sup> | X <sub>1</sub><br>(%) <sup>a</sup> | X <sub>5</sub><br>(%) <sup>a</sup> | X <sub>10</sub><br>(%) <sup>a</sup> | $\left(\frac{dX}{dt}\right)_0$<br>(s <sup>-1</sup> ) <sup>b</sup> | $\left(\frac{-d[LLA]}{dt}\right)$<br>(M·s <sup>-1</sup> ) <sup>c</sup> | $k_{obs}$<br>(s <sup>-1</sup> ) <sup>d</sup> | $k_{obs}[LLA]_0$<br>(M·s <sup>-1</sup> ) <sup>e</sup> | correction<br>factor <sup>f</sup> | (R <sub>p,corr</sub> ) <sub>0</sub><br>(M·s <sup>-1</sup> ) <sup>g</sup> |
|----------------------------------------|-----------------------------------------|-----------------------------------------|------------------------------------|------------------------------------|-------------------------------------|-------------------------------------------------------------------|------------------------------------------------------------------------|----------------------------------------------|-------------------------------------------------------|-----------------------------------|--------------------------------------------------------------------------|
| 0.20                                   | 2.0                                     | 1.0                                     | 14.42                              | 35.83                              | 52.28                               | 0.1736                                                            | 0.0347                                                                 | 0.0802                                       | 0.0160                                                | 1.195                             | 0.0415                                                                   |
| 0.22                                   | 2.2                                     | 1.1                                     | 15.10                              | 38.49                              | 55.48                               | 0.1806                                                            | 0.0397                                                                 | 0.0880                                       | 0.0194                                                | 1.174                             | 0.0467                                                                   |
| 0.24                                   | 2.4                                     | 1.2                                     | 15.18                              | 41.08                              | 57.31                               | 0.1787                                                            | 0.0429                                                                 | 0.0937                                       | 0.0225                                                | 1.157                             | 0.0496                                                                   |
| 0.26                                   | 2.6                                     | 1.3                                     | 16.58                              | 45.68                              | 61.23                               | 0.1939                                                            | 0.0504                                                                 | 0.1061                                       | 0.0276                                                | 1.143                             | 0.0576                                                                   |
| 0.28                                   | 2.8                                     | 1.4                                     | 18.17                              | 50.12                              | 65.74                               | 0.2121                                                            | 0.0594                                                                 | 0.1212                                       | 0.0339                                                | 1.132                             | 0.0672                                                                   |
| 0.30                                   | 3.0                                     | 1.5                                     | 18.76                              | 52.57                              | 69.13                               | 0.2182                                                            | 0.0655                                                                 | 0.1326                                       | 0.0398                                                | 1.122                             | 0.0734                                                                   |
| 0.32                                   | 3.2                                     | 1.6                                     | 20.24                              | 56.14                              | 73.97                               | 0.2360                                                            | 0.0755                                                                 | 0.1513                                       | 0.0484                                                | 1.113                             | 0.0841                                                                   |
| 0.34                                   | 3.4                                     | 1.7                                     | 22.27                              | 61.60                              | 77.90                               | 0.2592                                                            | 0.0881                                                                 | 0.1739                                       | 0.0591                                                | 1.106                             | 0.0975                                                                   |
| 0.36                                   | 3.6                                     | 1.8                                     | 24.67                              | 67.02                              | 81.43                               | 0.2878                                                            | 0.1036                                                                 | 0.1996                                       | 0.0719                                                | 1.100                             | 0.1139                                                                   |
| 0.38                                   | 3.8                                     | 1.9                                     | 25.66                              | 71.52                              | 84.93                               | 0.2970                                                            | 0.1129                                                                 | 0.2274                                       | 0.0864                                                | 1.094                             | 0.1235                                                                   |
| 0.40                                   | 4.0                                     | 2.0                                     | 27.24                              | 74.58                              | 88.49                               | 0.3168                                                            | 0.1267                                                                 | 0.2586                                       | 0.1034                                                | 1.089                             | 0.1379                                                                   |
| 0.42                                   | 4.2                                     | 2.1                                     | 30.65                              | 78.34                              | 92.52                               | 0.3623                                                            | 0.1522                                                                 | 0.3072                                       | 0.1290                                                | 1.084                             | 0.1650                                                                   |
| 0.44                                   | 4.4                                     | 2.2                                     | 32.70                              | 83.95                              | 96.26                               | 0.3856                                                            | 0.1697                                                                 | 0.3727                                       | 0.1640                                                | 1.080                             | 0.1832                                                                   |
| 0.46                                   | 4.6                                     | 2.3                                     | 33.31                              | 85.64                              | 97.35                               | 0.3925                                                            | 0.1805                                                                 | 0.3938                                       | 0.1811                                                | 1.076                             | 0.1943                                                                   |
| 0.48                                   | 4.8                                     | 2.4                                     | 34.94                              | 89.88                              | 98.32                               | 0.4109                                                            | 0.1972                                                                 | 0.4392                                       | 0.2108                                                | 1.073                             | 0.2116                                                                   |
| 0.50                                   | 5.0                                     | 2.5                                     | 37.50                              | 93.25                              | 98.85                               | 0.4439                                                            | 0.2219                                                                 | 0.4846                                       | 0.2423                                                | 1.070                             | 0.2374                                                                   |
| 0.52                                   | 5.2                                     | 2.6                                     | 39.17                              | 94.87                              | 99.32                               | 0.4662                                                            | 0.2424                                                                 | 0.5116                                       | 0.2660                                                | 1.067                             | 0.2586                                                                   |
| 0.54                                   | 5.4                                     | 2.7                                     | 39.64                              | 96.29                              | 99.48                               | 0.4712                                                            | 0.2544                                                                 | 0.5182                                       | 0.2798                                                | 1.064                             | 0.2708                                                                   |
| 0.56                                   | 5.6                                     | 2.8                                     | 40.32                              | 95.74                              | 98.40                               | 0.4816                                                            | 0.2697                                                                 | 0.5222                                       | 0.2925                                                | 1.062                             | 0.2864                                                                   |
| 0.58                                   | 5.8                                     | 2.9                                     | 41.27                              | 96.10                              | 99.18                               | 0.4952                                                            | 0.2872                                                                 | 0.5427                                       | 0.3148                                                | 1.060                             | 0.3043                                                                   |
| 0.60                                   | 6.0                                     | 3.0                                     | 42.43                              | 97.77                              | 98.71                               | 0.5098                                                            | 0.3059                                                                 | 0.5540                                       | 0.3324                                                | 1.057                             | 0.3234                                                                   |
| 0.62                                   | 6.2                                     | 3.1                                     | 45.09                              | 97.07                              | 98.84                               | 0.5495                                                            | 0.3407                                                                 | 0.6001                                       | 0.3721                                                | 1.056                             | 0.3596                                                                   |
| 0.64                                   | 6.4                                     | 3.2                                     | 46.45                              | 96.49                              | 99.88                               | 0.5703                                                            | 0.3650                                                                 | 0.6290                                       | 0.4025                                                | 1.054                             | 0.3846                                                                   |
| 0.66                                   | 6.6                                     | 3.3                                     | 46.34                              | 97.90                              | 99.42                               | 0.5668                                                            | 0.3741                                                                 | 0.6268                                       | 0.4137                                                | 1.052                             | 0.3935                                                                   |
| 0.68                                   | 6.8                                     | 3.4                                     | 49.19                              | 98.07                              | 98.14                               | 0.6079                                                            | 0.4133                                                                 | 0.6486                                       | 0.4411                                                | 1.050                             | 0.4342                                                                   |
| 0.70                                   | 7.0                                     | 3.5                                     | 51.80                              | 99.51                              | 99.22                               | 0.6442                                                            | 0.4510                                                                 | 0.7244                                       | 0.5071                                                | 1.049                             | 0.4730                                                                   |
| 0.72                                   | 7.2                                     | 3.6                                     | 51.72                              | 99.27                              | 99.46                               | 0.6434                                                            | 0.4633                                                                 | 0.7271                                       | 0.5235                                                | 1.047                             | 0.4852                                                                   |
| 0.74                                   | 7.4                                     | 3.7                                     | 51.69                              | 98.24                              | 99.46                               | 0.6444                                                            | 0.4768                                                                 | 0.7276                                       | 0.5384                                                | 1.046                             | 0.4988                                                                   |
| 0.76                                   | 7.6                                     | 3.8                                     | 52.58                              | 98.28                              | 99.34                               | 0.6573                                                            | 0.4995                                                                 | 0.7437                                       | 0.5652                                                | 1.045                             | 0.5219                                                                   |
| 0.78                                   | 7.8                                     | 3.9                                     | 53.39                              | 98.96                              | 98.81                               | 0.6681                                                            | 0.5211                                                                 | 0.7457                                       | 0.5817                                                | 1.044                             | 0.5438                                                                   |
| 0.80                                   | 8.0                                     | 4.0                                     | 54.48                              | 99.10                              | 99.14                               | 0.6838                                                            | 0.5471                                                                 | 0.7778                                       | 0.6223                                                | 1.042                             | 0.5703                                                                   |

<sup>a</sup> Data from Table S8, Zhang and Junkers, *Chem. Sci.* 2026, **17**, 4706-4714. <sup>b</sup> Derivative of cubic spline

interpolator of conversion data at  $t = 0$ . <sup>c</sup>  $\left(\frac{d[LLA]}{dt}\right)_0 = \left(\frac{dX}{dt}\right)_0 \cdot [LLA]_0$ . <sup>d</sup> Apparent first-order rate constant obtained by fitting  $\hat{X} = 1 - \exp(-k_{obs}t)$  to conversion data. <sup>e</sup> Initial rate of monomer consumption predicted from  $k_{obs}$ . <sup>f</sup> Correction factor =  $[LLA]_0 / ([LLA]_0 - [LLA]_{eq})$ ;  $[LLA]_{eq} = 0.0326$  M (Table S18). <sup>g</sup> Corrected  $(R_p)_0$  to remove contribution from depolymerization:  $(R_{p,corr})_0 = -(d[LLA]/dt)_0 \times [LLA]_0 / ([LLA]_0 - [LLA]_{eq})$ .

**Table S6.** Initial rate of monomer consumption,  $k_{obs}$  and depolymerization-corrected rate of monomer consumption for monomer concentration sweep data at 10°C

| [LLA] <sub>0</sub><br>(M) <sup>a</sup> | [MBA] <sub>0</sub><br>(mM) <sup>a</sup> | [TBD] <sub>0</sub><br>(mM) <sup>a</sup> | X <sub>1</sub><br>(%) <sup>a</sup> | X <sub>5</sub><br>(%) <sup>a</sup> | X <sub>10</sub><br>(%) <sup>a</sup> | $\left(\frac{dX}{dt}\right)_0$<br>(s <sup>-1</sup> ) <sup>b</sup> | $\left(\frac{-d[LLA]}{dt}\right)$<br>(M·s <sup>-1</sup> ) <sup>c</sup> | $k_{obs}$<br>(s <sup>-1</sup> ) <sup>d</sup> | $k_{obs}[LLA]_0$<br>(M·s <sup>-1</sup> ) <sup>e</sup> | correction<br>factor <sup>f</sup> | (R <sub>p,corr</sub> ) <sub>0</sub><br>(M·s <sup>-1</sup> ) <sup>g</sup> |
|----------------------------------------|-----------------------------------------|-----------------------------------------|------------------------------------|------------------------------------|-------------------------------------|-------------------------------------------------------------------|------------------------------------------------------------------------|----------------------------------------------|-------------------------------------------------------|-----------------------------------|--------------------------------------------------------------------------|
| 0.20                                   | 2.0                                     | 1.0                                     | 24.90                              | 46.88                              | 62.3                                | 0.0126                                                            | 0.0628                                                                 | 0.1118                                       | 0.0224                                                | 1.151                             | 0.0722                                                                   |
| 0.22                                   | 2.2                                     | 1.1                                     | 27.66                              | 50.71                              | 65.94                               | 0.0169                                                            | 0.0770                                                                 | 0.1252                                       | 0.0275                                                | 1.135                             | 0.0874                                                                   |
| 0.24                                   | 2.4                                     | 1.2                                     | 30.29                              | 53.06                              | 68.76                               | 0.0222                                                            | 0.0925                                                                 | 0.1361                                       | 0.0327                                                | 1.123                             | 0.1039                                                                   |
| 0.26                                   | 2.6                                     | 1.3                                     | 33.78                              | 56.23                              | 70.87                               | 0.0293                                                            | 0.1125                                                                 | 0.1472                                       | 0.0383                                                | 1.112                             | 0.1251                                                                   |
| 0.28                                   | 2.8                                     | 1.4                                     | 36.63                              | 60.08                              | 73.44                               | 0.0368                                                            | 0.1315                                                                 | 0.1617                                       | 0.0453                                                | 1.103                             | 0.1451                                                                   |
| 0.30                                   | 3.0                                     | 1.5                                     | 38.86                              | 63.91                              | 77.33                               | 0.0448                                                            | 0.1494                                                                 | 0.1836                                       | 0.0551                                                | 1.096                             | 0.1637                                                                   |
| 0.32                                   | 3.2                                     | 1.6                                     | 42.24                              | 68.88                              | 81.6                                | 0.0555                                                            | 0.1733                                                                 | 0.2152                                       | 0.0689                                                | 1.089                             | 0.1888                                                                   |
| 0.34                                   | 3.4                                     | 1.7                                     | 43.59                              | 73.08                              | 84.65                               | 0.0643                                                            | 0.1892                                                                 | 0.2450                                       | 0.0833                                                | 1.083                             | 0.2050                                                                   |
| 0.36                                   | 3.6                                     | 1.8                                     | 45.49                              | 76.50                              | 87.98                               | 0.0752                                                            | 0.2089                                                                 | 0.2838                                       | 0.1022                                                | 1.078                             | 0.2253                                                                   |
| 0.38                                   | 3.8                                     | 1.9                                     | 46.70                              | 81.57                              | 92.07                               | 0.0855                                                            | 0.2250                                                                 | 0.3549                                       | 0.1349                                                | 1.074                             | 0.2416                                                                   |
| 0.40                                   | 4.0                                     | 2.0                                     | 47.22                              | 86.39                              | 96.4                                | 0.0951                                                            | 0.2377                                                                 | 0.4658                                       | 0.1863                                                | 1.070                             | 0.2543                                                                   |
| 0.42                                   | 4.2                                     | 2.1                                     | 48.79                              | 88.87                              | 99.57                               | 0.1084                                                            | 0.2581                                                                 | 0.5446                                       | 0.2287                                                | 1.067                             | 0.2752                                                                   |
| 0.44                                   | 4.4                                     | 2.2                                     | 50.87                              | 91.40                              | 99.97                               | 0.1242                                                            | 0.2823                                                                 | 0.6153                                       | 0.2707                                                | 1.063                             | 0.3001                                                                   |
| 0.46                                   | 4.6                                     | 2.3                                     | 52.22                              | 94.35                              | 98.47                               | 0.1390                                                            | 0.3022                                                                 | 0.6765                                       | 0.3112                                                | 1.060                             | 0.3205                                                                   |
| 0.48                                   | 4.8                                     | 2.4                                     | 54.44                              | 95.59                              | 98.06                               | 0.1584                                                            | 0.3301                                                                 | 0.7092                                       | 0.3404                                                | 1.058                             | 0.3491                                                                   |
| 0.50                                   | 5.0                                     | 2.5                                     | 56.38                              | 97.29                              | 98.12                               | 0.1784                                                            | 0.3569                                                                 | 0.7589                                       | 0.3795                                                | 1.055                             | 0.3766                                                                   |
| 0.52                                   | 5.2                                     | 2.6                                     | 57.28                              | 99.15                              | 98.99                               | 0.1959                                                            | 0.3768                                                                 | 0.8310                                       | 0.4321                                                | 1.053                             | 0.3968                                                                   |
| 0.54                                   | 5.4                                     | 2.7                                     | 57.90                              | 99.54                              | 99.64                               | 0.2138                                                            | 0.3960                                                                 | 0.8636                                       | 0.4663                                                | 1.051                             | 0.4161                                                                   |
| 0.56                                   | 5.6                                     | 2.8                                     | 58.88                              | 99.20                              | 98.22                               | 0.2345                                                            | 0.4187                                                                 | 0.8132                                       | 0.4554                                                | 1.049                             | 0.4393                                                                   |
| 0.58                                   | 5.8                                     | 2.9                                     | 60.12                              | 98.22                              | 99.10                               | 0.2581                                                            | 0.4450                                                                 | 0.8934                                       | 0.5182                                                | 1.047                             | 0.4661                                                                   |
| 0.60                                   | 6.0                                     | 3.0                                     | 60.41                              | 98.70                              | 99.38                               | 0.2775                                                            | 0.4625                                                                 | 0.9153                                       | 0.5492                                                | 1.046                             | 0.4837                                                                   |
| 0.62                                   | 6.2                                     | 3.1                                     | 61.09                              | 99.50                              | 98.70                               | 0.2997                                                            | 0.4834                                                                 | 0.8934                                       | 0.5539                                                | 1.044                             | 0.5047                                                                   |
| 0.64                                   | 6.4                                     | 3.2                                     | 62.17                              | 99.22                              | 99.09                               | 0.3260                                                            | 0.5093                                                                 | 0.9449                                       | 0.6047                                                | 1.043                             | 0.5311                                                                   |
| 0.66                                   | 6.6                                     | 3.3                                     | 62.96                              | 98.68                              | 99.75                               | 0.3520                                                            | 0.5334                                                                 | 0.9875                                       | 0.6518                                                | 1.041                             | 0.5554                                                                   |
| 0.68                                   | 6.8                                     | 3.4                                     | 63.60                              | 99.04                              | 98.81                               | 0.3777                                                            | 0.5555                                                                 | 0.9554                                       | 0.6497                                                | 1.040                             | 0.5777                                                                   |
| 0.70                                   | 7.0                                     | 3.5                                     | 63.08                              | 99.52                              | 99.23                               | 0.3963                                                            | 0.5661                                                                 | 0.9755                                       | 0.6829                                                | 1.039                             | 0.5881                                                                   |
| 0.72                                   | 7.2                                     | 3.6                                     | 63.47                              | 99.64                              | 98.96                               | 0.4221                                                            | 0.5862                                                                 | 0.9661                                       | 0.6956                                                | 1.038                             | 0.6084                                                                   |
| 0.74                                   | 7.4                                     | 3.7                                     | 64.85                              | 98.91                              | 99.38                               | 0.4575                                                            | 0.6182                                                                 | 1.0265                                       | 0.7596                                                | 1.037                             | 0.6409                                                                   |
| 0.76                                   | 7.6                                     | 3.8                                     | 64.36                              | 98.70                              | 99.80                               | 0.4786                                                            | 0.6297                                                                 | 1.0252                                       | 0.7792                                                | 1.036                             | 0.6522                                                                   |
| 0.78                                   | 7.8                                     | 3.9                                     | 62.76                              | 99.39                              | 99.17                               | 0.4893                                                            | 0.6273                                                                 | 0.9641                                       | 0.7520                                                | 1.035                             | 0.6491                                                                   |
| 0.80                                   | 8.0                                     | 4.0                                     | 64.03                              | 99.29                              | 99.22                               | 0.5266                                                            | 0.6583                                                                 | 0.9983                                       | 0.7986                                                | 1.034                             | 0.6806                                                                   |

<sup>a</sup> Data from Table S9, Zhang and Junkers, *Chem. Sci.* 2026, **17**, 4706-4714. <sup>b</sup> Derivative of cubic spline

interpolator of conversion data at  $t = 0$ . <sup>c</sup>  $\left(\frac{d[LLA]}{dt}\right)_0 = \left(\frac{dX}{dt}\right)_0 \cdot [LLA]_0$ . <sup>d</sup> Apparent first-order rate constant obtained by fitting  $\hat{X} = 1 - \exp(-k_{obs}t)$  to conversion data. <sup>e</sup> Initial rate of monomer consumption predicted from  $k_{obs}$ . <sup>f</sup> Correction factor =  $[LLA]_0 / ([LLA]_0 - [LLA]_{eq})$ ;  $[LLA]_{eq} = 0.0262$  M (Table S18). <sup>g</sup> Corrected  $(R_p)_0$  to remove contribution from depolymerization:  $(R_{p,corr})_0 = -(d[LLA]/dt)_0 \times [LLA]_0 / ([LLA]_0 - [LLA]_{eq})$ .

**Table S7.** Initial rate of monomer consumption,  $k_{obs}$  and depolymerization-corrected rate of monomer consumption for monomer concentration sweep data at 0°C

| [LLA] <sub>0</sub><br>(M) <sup>a</sup> | [MBA] <sub>0</sub><br>(mM) <sup>a</sup> | [TBD] <sub>0</sub><br>(mM) <sup>a</sup> | X <sub>1</sub><br>(%) <sup>a</sup> | X <sub>5</sub><br>(%) <sup>a</sup> | X <sub>10</sub><br>(%) <sup>a</sup> | $\left(\frac{dX}{dt}\right)_0$<br>(s <sup>-1</sup> ) <sup>b</sup> | $\left(\frac{-d[LLA]}{dt}\right)$<br>(M·s <sup>-1</sup> ) <sup>c</sup> | $k_{obs}$<br>(s <sup>-1</sup> ) <sup>d</sup> | $k_{obs}[LLA]_0$<br>(M·s <sup>-1</sup> ) <sup>e</sup> | correction<br>factor <sup>f</sup> | (R <sub>p,corr</sub> ) <sub>0</sub><br>(M·s <sup>-1</sup> ) <sup>g</sup> |
|----------------------------------------|-----------------------------------------|-----------------------------------------|------------------------------------|------------------------------------|-------------------------------------|-------------------------------------------------------------------|------------------------------------------------------------------------|----------------------------------------------|-------------------------------------------------------|-----------------------------------|--------------------------------------------------------------------------|
| 0.20                                   | 2.0                                     | 1.0                                     | 28.52                              | 59.37                              | 65.67                               | 0.3509                                                            | 0.0702                                                                 | 0.1324                                       | 0.0265                                                | 1.115                             | 0.0783                                                                   |
| 0.22                                   | 2.2                                     | 1.1                                     | 38.68                              | 62.60                              | 67.52                               | 0.4952                                                            | 0.1089                                                                 | 0.1427                                       | 0.0314                                                | 1.104                             | 0.1203                                                                   |
| 0.24                                   | 2.4                                     | 1.2                                     | 44.90                              | 64.39                              | 70.62                               | 0.5841                                                            | 0.1402                                                                 | 0.1564                                       | 0.0375                                                | 1.094                             | 0.1534                                                                   |
| 0.26                                   | 2.6                                     | 1.3                                     | 47.62                              | 66.38                              | 74.78                               | 0.6220                                                            | 0.1617                                                                 | 0.1765                                       | 0.0459                                                | 1.087                             | 0.1757                                                                   |
| 0.28                                   | 2.8                                     | 1.4                                     | 50.52                              | 69.03                              | 80.06                               | 0.6619                                                            | 0.1853                                                                 | 0.2078                                       | 0.0582                                                | 1.080                             | 0.2001                                                                   |
| 0.30                                   | 3.0                                     | 1.5                                     | 53.69                              | 71.71                              | 85.37                               | 0.7056                                                            | 0.2117                                                                 | 0.2484                                       | 0.0745                                                | 1.074                             | 0.2274                                                                   |
| 0.32                                   | 3.2                                     | 1.6                                     | 53.93                              | 74.89                              | 89.85                               | 0.7058                                                            | 0.2259                                                                 | 0.2965                                       | 0.0949                                                | 1.069                             | 0.2415                                                                   |
| 0.34                                   | 3.4                                     | 1.7                                     | 53.60                              | 78.72                              | 96.18                               | 0.6973                                                            | 0.2371                                                                 | 0.3772                                       | 0.1283                                                | 1.065                             | 0.2524                                                                   |
| 0.36                                   | 3.6                                     | 1.8                                     | 53.96                              | 82.41                              | 99.46                               | 0.6983                                                            | 0.2514                                                                 | 0.4399                                       | 0.1584                                                | 1.061                             | 0.2667                                                                   |
| 0.38                                   | 3.8                                     | 1.9                                     | 55.31                              | 86.86                              | 100 <sup>h</sup>                    | 0.7122                                                            | 0.2707                                                                 | 0.5323 <sup>h</sup>                          | 0.2023 <sup>h</sup>                                   | 1.058                             | 0.2862                                                                   |
| 0.40                                   | 4.0                                     | 2.0                                     | 57.58                              | 92.05                              | 99.83                               | 0.7385                                                            | 0.2954                                                                 | 0.6933                                       | 0.2773                                                | 1.055                             | 0.3115                                                                   |
| 0.42                                   | 4.2                                     | 2.1                                     | 59.34                              | 96.28                              | 99.31                               | 0.7585                                                            | 0.3186                                                                 | 0.8497                                       | 0.3569                                                | 1.052                             | 0.3351                                                                   |
| 0.44                                   | 4.4                                     | 2.2                                     | 59.53                              | 98.35                              | 99.16                               | 0.7585                                                            | 0.3337                                                                 | 0.8845                                       | 0.3892                                                | 1.049                             | 0.3502                                                                   |
| 0.46                                   | 4.6                                     | 2.3                                     | 60.13                              | 98.99                              | 99.88                               | 0.7665                                                            | 0.3526                                                                 | 0.9193                                       | 0.4229                                                | 1.047                             | 0.3692                                                                   |
| 0.48                                   | 4.8                                     | 2.4                                     | 59.64                              | 99.25                              | 99.44                               | 0.7590                                                            | 0.3643                                                                 | 0.9006                                       | 0.4323                                                | 1.045                             | 0.3807                                                                   |
| 0.50                                   | 5.0                                     | 2.5                                     | 61.18                              | 99.35                              | 99.07                               | 0.7812                                                            | 0.3906                                                                 | 0.9208                                       | 0.4604                                                | 1.043                             | 0.4075                                                                   |
| 0.52                                   | 5.2                                     | 2.6                                     | 63.01                              | 99.13                              | 98.90                               | 0.8082                                                            | 0.4202                                                                 | 0.9503                                       | 0.4942                                                | 1.041                             | 0.4377                                                                   |
| 0.54                                   | 5.4                                     | 2.7                                     | 62.70                              | 99.06                              | 98.41                               | 0.8036                                                            | 0.4340                                                                 | 0.8987                                       | 0.4853                                                | 1.040                             | 0.4513                                                                   |
| 0.56                                   | 5.6                                     | 2.8                                     | 63.05                              | 99.45                              | 98.29                               | 0.8082                                                            | 0.4526                                                                 | 0.8924                                       | 0.4998                                                | 1.038                             | 0.4700                                                                   |
| 0.58                                   | 5.8                                     | 2.9                                     | 64.00                              | 99.28                              | 98.15                               | 0.8222                                                            | 0.4769                                                                 | 0.8923                                       | 0.5175                                                | 1.037                             | 0.4946                                                                   |
| 0.60                                   | 6.0                                     | 3.0                                     | 65.30                              | 99.70                              | 99.23                               | 0.8409                                                            | 0.5045                                                                 | 1.0318                                       | 0.6191                                                | 1.036                             | 0.5226                                                                   |
| 0.62                                   | 6.2                                     | 3.1                                     | 64.74                              | 99.91                              | 99.87                               | 0.8326                                                            | 0.5162                                                                 | 1.0420                                       | 0.6460                                                | 1.035                             | 0.5340                                                                   |
| 0.64                                   | 6.4                                     | 3.2                                     | 64.28                              | 99.77                              | 98.97                               | 0.8258                                                            | 0.5285                                                                 | 0.9858                                       | 0.6309                                                | 1.033                             | 0.5462                                                                   |
| 0.66                                   | 6.6                                     | 3.3                                     | 65.42                              | 99.90                              | 98.49                               | 0.8422                                                            | 0.5559                                                                 | 0.9591                                       | 0.6330                                                | 1.032                             | 0.5739                                                                   |
| 0.68                                   | 6.8                                     | 3.4                                     | 65.85                              | 99.84                              | 99.41                               | 0.8487                                                            | 0.5771                                                                 | 1.0583                                       | 0.7196                                                | 1.031                             | 0.5953                                                                   |
| 0.70                                   | 7.0                                     | 3.5                                     | 66.84                              | 99.30                              | 98.36                               | 0.8637                                                            | 0.6046                                                                 | 0.9679                                       | 0.6775                                                | 1.030                             | 0.6230                                                                   |
| 0.72                                   | 7.2                                     | 3.6                                     | 68.09                              | 99.49                              | 97.83                               | 0.8816                                                            | 0.6347                                                                 | 0.9028                                       | 0.6500                                                | 1.030                             | 0.6535                                                                   |
| 0.74                                   | 7.4                                     | 3.7                                     | 66.97                              | 99.71                              | 98.75                               | 0.8651                                                            | 0.6402                                                                 | 1.0241                                       | 0.7578                                                | 1.029                             | 0.6586                                                                   |
| 0.76                                   | 7.6                                     | 3.8                                     | 66.64                              | 99.76                              | 99.10                               | 0.8603                                                            | 0.6538                                                                 | 1.0555                                       | 0.8022                                                | 1.028                             | 0.6721                                                                   |
| 0.78                                   | 7.8                                     | 3.9                                     | 67.49                              | 99.90                              | 98.59                               | 0.8724                                                            | 0.6805                                                                 | 1.0133                                       | 0.7904                                                | 1.027                             | 0.6990                                                                   |
| 0.80                                   | 8.0                                     | 4.0                                     | 64.03                              | 99.69                              | 99.25                               | 0.8224                                                            | 0.6579                                                                 | 1.0005                                       | 0.8004                                                | 1.027                             | 0.6754                                                                   |

<sup>a</sup> Data from Table S10, Zhang and Junkers, *Chem. Sci.* 2026, **17**, 4706-4714. <sup>b</sup> Derivative of cubic spline

interpolator of conversion data at  $t = 0$ . <sup>c</sup>  $\left(\frac{d[LLA]}{dt}\right)_0 = \left(\frac{dX}{dt}\right)_0 \cdot [LLA]_0$ . <sup>d</sup> Apparent first-order rate constant obtained by fitting  $\hat{X} = 1 - \exp(-k_{obs}t)$  to conversion data. <sup>e</sup> Initial rate of monomer consumption predicted from  $k_{obs}$ . <sup>f</sup> Correction factor =  $[LLA]_0 / ([LLA]_0 - [LLA]_{eq})$ ;  $[LLA]_{eq} = 0.0207$  M (Table S18). <sup>g</sup> Corrected  $(R_p)_0$  to remove contribution from depolymerization:  $(R_{p,corr})_0 = -(d[LLA]/dt)_0 \times [LLA]_0 / ([LLA]_0 - [LLA]_{eq})$ . <sup>h</sup> X<sub>10</sub> set to 99.99% to fit  $k_{obs}$ .



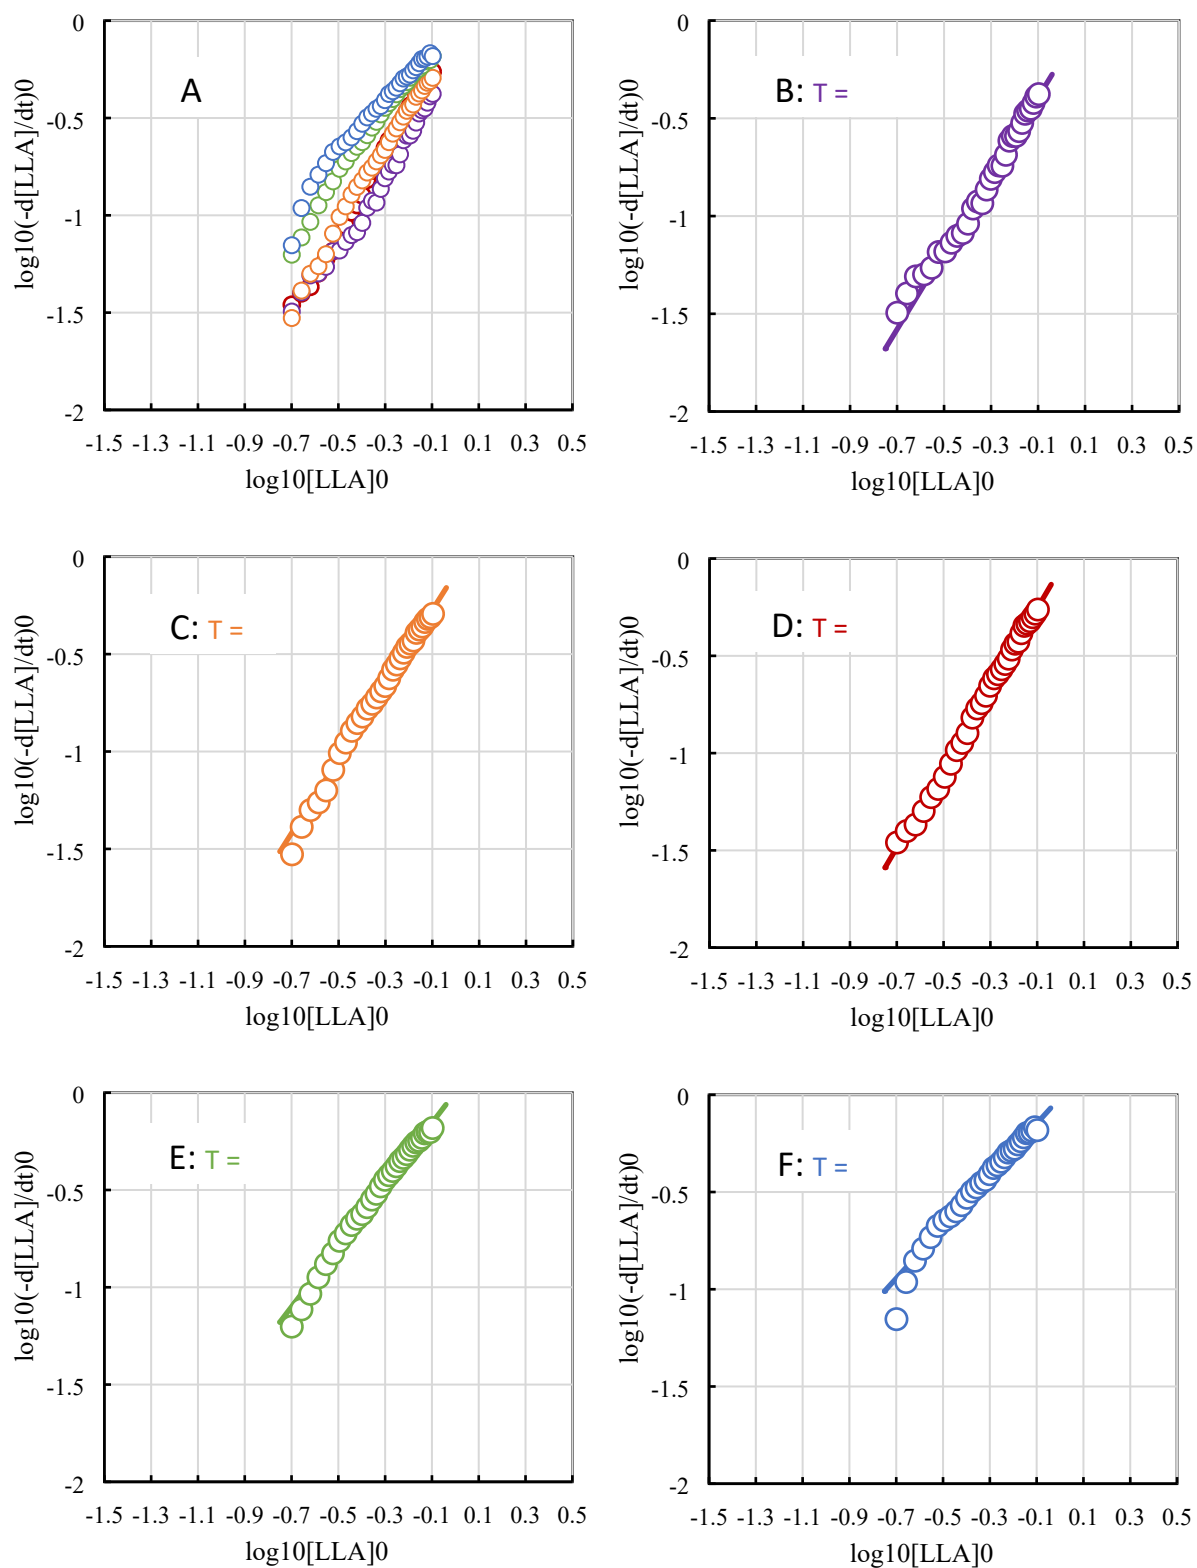

**Figure S1.** Log-log plots of initial rate of lactide consumption vs initial lactide concentration for all monomer sweep experiments (A) and for individual temperatures showing overall reaction order (B-F).

**Table S8.** Initial rate of monomer consumption,  $k_{obs}$  and depolymerization-corrected rate of monomer consumption for catalyst concentration sweep data at 20°C,  $[LLA]_0 = 0.2$  M

| $[LLA]_0$<br>(M) <sup>a</sup> | $[MBA]_0$<br>(mM) <sup>a</sup> | $[TBD]_0$<br>(mM) <sup>a</sup> | $X_1$<br>(%) <sup>a</sup> | $X_5$<br>(%) <sup>a</sup> | $X_{10}$<br>(%) <sup>a</sup> | $\left(\frac{dX}{dt}\right)_0$<br>(s <sup>-1</sup> ) <sup>b</sup> | $\left(\frac{-d[LLA]}{dt}\right)$<br>(M·s <sup>-1</sup> ) <sup>c</sup> | $k_{obs}$<br>(s <sup>-1</sup> ) <sup>d</sup> | $k_{obs}[LLA]_0$<br>(M·s <sup>-1</sup> ) <sup>e</sup> | $(R_{p,corr})_0$<br>(M·s <sup>-1</sup> ) <sup>f</sup> |
|-------------------------------|--------------------------------|--------------------------------|---------------------------|---------------------------|------------------------------|-------------------------------------------------------------------|------------------------------------------------------------------------|----------------------------------------------|-------------------------------------------------------|-------------------------------------------------------|
| 0.20                          | 2.0                            | 1.000                          | 10.38                     | 43.21                     | 51.95                        | 0.1049                                                            | 0.0210                                                                 | 0.0843                                       | 0.0169                                                | 0.1253                                                |
| 0.20                          | 2.0                            | 0.800                          | 9.60                      | 40.22                     | 47.32                        | 0.0965                                                            | 0.0193                                                                 | 0.0741                                       | 0.0148                                                | 0.0922                                                |
| 0.20                          | 2.0                            | 0.667                          | 8.90                      | 39.53                     | 44.23                        | 0.0866                                                            | 0.0173                                                                 | 0.0685                                       | 0.0137                                                | 0.0690                                                |
| 0.20                          | 2.0                            | 0.571                          | 8.03                      | 36.96                     | 42.90                        | 0.0770                                                            | 0.0154                                                                 | 0.0649                                       | 0.0130                                                | 0.0526                                                |
| 0.20                          | 2.0                            | 0.500                          | 7.37                      | 35.85                     | 40.99                        | 0.0685                                                            | 0.0137                                                                 | 0.0613                                       | 0.0123                                                | 0.0409                                                |
| 0.20                          | 2.0                            | 0.444                          | 6.99                      | 32.21                     | 37.06                        | 0.0669                                                            | 0.0134                                                                 | 0.0537                                       | 0.0107                                                | 0.0355                                                |
| 0.20                          | 2.0                            | 0.400                          | 6.92                      | 30.60                     | 33.50                        | 0.0673                                                            | 0.0135                                                                 | 0.0481                                       | 0.0096                                                | 0.0322                                                |
| 0.20                          | 2.0                            | 0.364                          | 6.69                      | 27.96                     | 31.31                        | 0.0670                                                            | 0.0134                                                                 | 0.0440                                       | 0.0088                                                | 0.0291                                                |
| 0.20                          | 2.0                            | 0.333                          | 6.12                      | 25.13                     | 30.06                        | 0.0622                                                            | 0.0124                                                                 | 0.0410                                       | 0.0082                                                | 0.0248                                                |
| 0.20                          | 2.0                            | 0.308                          | 6.03                      | 22.80                     | 27.04                        | 0.0633                                                            | 0.0127                                                                 | 0.0363                                       | 0.0073                                                | 0.0233                                                |
| 0.20                          | 2.0                            | 0.286                          | 6.18                      | 21.73                     | 25.18                        | 0.0665                                                            | 0.0133                                                                 | 0.0337                                       | 0.0067                                                | 0.0227                                                |
| 0.20                          | 2.0                            | 0.267                          | 5.49                      | 21.17                     | 22.38                        | 0.0567                                                            | 0.0113                                                                 | 0.0302                                       | 0.0060                                                | 0.0181                                                |
| 0.20                          | 2.0                            | 0.250                          | 5.74                      | 19.58                     | 21.18                        | 0.0622                                                            | 0.0124                                                                 | 0.0282                                       | 0.0056                                                | 0.0186                                                |
| 0.20                          | 2.0                            | 0.235                          | 6.01                      | 17.71                     | 20.60                        | 0.0684                                                            | 0.0137                                                                 | 0.0268                                       | 0.0054                                                | 0.0192                                                |
| 0.20                          | 2.0                            | 0.222                          | 6.05                      | 16.51                     | 19.90                        | 0.0705                                                            | 0.0141                                                                 | 0.0256                                       | 0.0051                                                | 0.0187                                                |
| 0.20                          | 2.0                            | 0.211                          | 5.57                      | 15.69                     | 19.49                        | 0.0645                                                            | 0.0129                                                                 | 0.0247                                       | 0.0049                                                | 0.0162                                                |
| 0.20                          | 2.0                            | 0.200                          | 5.46                      | 16.19                     | 18.19                        | 0.0619                                                            | 0.0124                                                                 | 0.0236                                       | 0.0047                                                | 0.0148                                                |
| 0.20                          | 2.0                            | 0.190                          | 4.73                      | 15.28                     | 17.05                        | 0.0523                                                            | 0.0105                                                                 | 0.0220                                       | 0.0044                                                | 0.0119                                                |
| 0.20                          | 2.0                            | 0.182                          | 4.51                      | 13.61                     | 16.08                        | 0.0511                                                            | 0.0102                                                                 | 0.0203                                       | 0.0041                                                | 0.0111                                                |
| 0.20                          | 2.0                            | 0.174                          | 5.42                      | 12.12                     | 17.37                        | 0.0666                                                            | 0.0133                                                                 | 0.0209                                       | 0.0042                                                | 0.0138                                                |
| 0.20                          | 2.0                            | 0.167                          | 4.68                      | 11.58                     | 16.53                        | 0.0563                                                            | 0.0113                                                                 | 0.0198                                       | 0.0040                                                | 0.0112                                                |

<sup>a</sup> Data from Table S11, Zhang and Junkers, *Chem. Sci.* 2026, **17**, 4706-4714. <sup>b</sup> Derivative of cubic spline

interpolator of conversion data at  $t = 0$ . <sup>c</sup>  $\left(\frac{d[LLA]}{dt}\right)_0 = \left(\frac{dX}{dt}\right)_0 \cdot [LLA]_0$ . <sup>d</sup> Apparent first-order rate constant obtained by fitting  $\hat{X} = 1 - \exp(-k_{obs}t)$  to conversion data. <sup>e</sup> Initial rate of monomer consumption predicted from  $k_{obs}$ . <sup>f</sup> Corrected  $(R_p)_0$  to remove contribution from depolymerization:  $(R_{p,corr})_0 = -(d[LLA]/dt)_0 \times [LLA]_0 / ([LLA]_0 - [LLA]_{eq}) = -(d[LLA]/dt)_0 \times 1.195$ ;  $[LLA]_{eq} = 0.0326$  M (Table S18).

**Table S9.** Initial rate of monomer consumption,  $k_{obs}$  and depolymerization-corrected rate of monomer consumption for catalyst concentration sweep data at 20°C,  $[LLA]_0 = 0.35$  M

| $[LLA]_0$<br>(M) <sup>a</sup> | $[MBA]_0$<br>(mM) <sup>a</sup> | $[TBD]_0$<br>(mM) <sup>a</sup> | $X_1$<br>(%) <sup>a</sup> | $X_5$<br>(%) <sup>a</sup> | $X_{10}$<br>(%) <sup>a</sup> | $\left(\frac{dX}{dt}\right)_0$<br>(s <sup>-1</sup> ) <sup>b</sup> | $\left(\frac{-d[LLA]}{dt}\right)_0$<br>(M·s <sup>-1</sup> ) <sup>c</sup> | $k_{obs}$<br>(s <sup>-1</sup> ) <sup>d</sup> | $k_{obs}[LLA]_0$<br>(M·s <sup>-1</sup> ) <sup>e</sup> | $(R_{p,corr})_0$<br>(M·s <sup>-1</sup> ) <sup>f</sup> |
|-------------------------------|--------------------------------|--------------------------------|---------------------------|---------------------------|------------------------------|-------------------------------------------------------------------|--------------------------------------------------------------------------|----------------------------------------------|-------------------------------------------------------|-------------------------------------------------------|
| 0.35                          | 3.5                            | 1.750                          | 36.95                     | 68.21                     | 80.18                        | 0.4651                                                            | 0.1628                                                                   | 0.2041                                       | 0.0714                                                | 0.1795                                                |
| 0.35                          | 3.5                            | 1.400                          | 33.89                     | 64.40                     | 77.35                        | 0.4249                                                            | 0.1487                                                                   | 0.1828                                       | 0.0640                                                | 0.1640                                                |
| 0.35                          | 3.5                            | 1.167                          | 29.87                     | 60.02                     | 71.45                        | 0.3709                                                            | 0.1298                                                                   | 0.1526                                       | 0.0534                                                | 0.1431                                                |
| 0.35                          | 3.5                            | 1.000                          | 27.74                     | 58.60                     | 66.13                        | 0.3406                                                            | 0.1192                                                                   | 0.1331                                       | 0.0466                                                | 0.1315                                                |
| 0.35                          | 3.5                            | 0.875                          | 25.12                     | 55.10                     | 60.29                        | 0.3058                                                            | 0.1070                                                                   | 0.1135                                       | 0.0397                                                | 0.1180                                                |
| 0.35                          | 3.5                            | 0.778                          | 22.85                     | 51.39                     | 57.92                        | 0.2771                                                            | 0.0970                                                                   | 0.1049                                       | 0.0367                                                | 0.1070                                                |
| 0.35                          | 3.5                            | 0.700                          | 20.28                     | 48.27                     | 54.29                        | 0.2431                                                            | 0.0851                                                                   | 0.0943                                       | 0.0330                                                | 0.0938                                                |
| 0.35                          | 3.5                            | 0.636                          | 17.43                     | 45.28                     | 49.32                        | 0.2044                                                            | 0.0716                                                                   | 0.0821                                       | 0.0287                                                | 0.0789                                                |
| 0.35                          | 3.5                            | 0.583                          | 15.67                     | 42.39                     | 45.07                        | 0.1817                                                            | 0.0636                                                                   | 0.0726                                       | 0.0254                                                | 0.0701                                                |
| 0.35                          | 3.5                            | 0.538                          | 13.41                     | 38.82                     | 42.57                        | 0.1530                                                            | 0.0535                                                                   | 0.0663                                       | 0.0232                                                | 0.0590                                                |
| 0.35                          | 3.5                            | 0.500                          | 12.99                     | 35.00                     | 38.42                        | 0.1510                                                            | 0.0529                                                                   | 0.0580                                       | 0.0203                                                | 0.0583                                                |
| 0.35                          | 3.5                            | 0.467                          | 12.03                     | 31.92                     | 35.81                        | 0.1406                                                            | 0.0492                                                                   | 0.0526                                       | 0.0184                                                | 0.0543                                                |
| 0.35                          | 3.5                            | 0.438                          | 11.35                     | 28.04                     | 33.77                        | 0.1354                                                            | 0.0474                                                                   | 0.0478                                       | 0.0167                                                | 0.0522                                                |
| 0.35                          | 3.5                            | 0.412                          | 11.31                     | 24.36                     | 31.29                        | 0.1391                                                            | 0.0487                                                                   | 0.0428                                       | 0.0150                                                | 0.0537                                                |
| 0.35                          | 3.5                            | 0.389                          | 11.19                     | 22.16                     | 29.24                        | 0.1399                                                            | 0.0490                                                                   | 0.0392                                       | 0.0137                                                | 0.0540                                                |
| 0.35                          | 3.5                            | 0.368                          | 9.60                      | 23.03                     | 29.03                        | 0.1155                                                            | 0.0404                                                                   | 0.0392                                       | 0.0137                                                | 0.0446                                                |
| 0.35                          | 3.5                            | 0.350                          | 8.51                      | 22.82                     | 27.97                        | 0.0997                                                            | 0.0349                                                                   | 0.0377                                       | 0.0132                                                | 0.0385                                                |
| 0.35                          | 3.5                            | 0.333                          | 10.18                     | 21.66                     | 27.11                        | 0.1254                                                            | 0.0439                                                                   | 0.0363                                       | 0.0127                                                | 0.0484                                                |
| 0.35                          | 3.5                            | 0.318                          | 8.94                      | 21.32                     | 26.19                        | 0.1075                                                            | 0.0376                                                                   | 0.0350                                       | 0.0122                                                | 0.0415                                                |
| 0.35                          | 3.5                            | 0.304                          | 9.60                      | 19.98                     | 27.34                        | 0.1192                                                            | 0.0417                                                                   | 0.0357                                       | 0.0125                                                | 0.0460                                                |
| 0.35                          | 3.5                            | 0.292                          | 9.34                      | 18.86                     | 25.93                        | 0.1166                                                            | 0.0408                                                                   | 0.0335                                       | 0.0117                                                | 0.0450                                                |

<sup>a</sup> Data from Table S12, Zhang and Junkers, *Chem. Sci.* 2026, **17**, 4706-4714. <sup>b</sup> Derivative of cubic spline

interpolator of conversion data at  $t = 0$ . <sup>c</sup>  $\left(\frac{d[LLA]}{dt}\right)_0 = \left(\frac{dX}{dt}\right)_0 \cdot [LLA]_0$ . <sup>d</sup> Apparent first-order rate constant obtained by fitting  $\hat{X} = 1 - \exp(-k_{obs}t)$  to conversion data. <sup>e</sup> Initial rate of monomer consumption predicted from  $k_{obs}$ . <sup>f</sup> Corrected  $(R_p)_0$  to remove contribution from depolymerization:  $(R_{p,corr})_0 = -(d[LLA]/dt)_0 \times [LLA]_0 / ([LLA]_0 - [LLA]_{eq}) = -(d[LLA]/dt)_0 \times 1.103$ ;  $[LLA]_{eq} = 0.0326$  M (Table S18).

**Table S10.** Initial rate of monomer consumption,  $k_{obs}$  and depolymerization-corrected rate of monomer consumption for catalyst concentration sweep data at 20°C,  $[LLA]_0 = 0.5$  M

| $[LLA]_0$<br>(M) <sup>a</sup> | $[MBA]_0$<br>(mM) <sup>a</sup> | $[TBD]_0$<br>(mM) <sup>a</sup> | $X_1$<br>(%) <sup>a</sup> | $X_5$<br>(%) <sup>a</sup> | $X_{10}$<br>(%) <sup>a</sup> | $\left(\frac{dX}{dt}\right)_0$<br>(s <sup>-1</sup> ) <sup>b</sup> | $\left(\frac{-d[LLA]}{dt}\right)_0$<br>(M·s <sup>-1</sup> ) <sup>c</sup> | $k_{obs}$<br>(s <sup>-1</sup> ) <sup>d</sup> | $k_{obs}[LLA]_0$<br>(M·s <sup>-1</sup> ) <sup>e</sup> | $(R_{p,corr})_0$<br>(M·s <sup>-1</sup> ) <sup>f</sup> |
|-------------------------------|--------------------------------|--------------------------------|---------------------------|---------------------------|------------------------------|-------------------------------------------------------------------|--------------------------------------------------------------------------|----------------------------------------------|-------------------------------------------------------|-------------------------------------------------------|
| 0.50                          | 5.0                            | 2.500                          | 52.09                     | 99.95                     | 100 <sup>g</sup>             | 0.6480                                                            | 0.3240                                                                   | 0.7359 <sup>g</sup>                          | 0.3679 <sup>g</sup>                                   | 0.3466                                                |
| 0.50                          | 5.0                            | 2.000                          | 50.37                     | 99.73                     | 100 <sup>g</sup>             | 0.6233                                                            | 0.3116                                                                   | 0.7009 <sup>g</sup>                          | 0.3505 <sup>g</sup>                                   | 0.3334                                                |
| 0.50                          | 5.0                            | 1.667                          | 47.57                     | 99.23                     | 100 <sup>g</sup>             | 0.5831                                                            | 0.2915                                                                   | 0.6474 <sup>g</sup>                          | 0.3237 <sup>g</sup>                                   | 0.3119                                                |
| 0.50                          | 5.0                            | 1.429                          | 41.00                     | 93.61                     | 100 <sup>g</sup>             | 0.4947                                                            | 0.2473                                                                   | 0.5327 <sup>g</sup>                          | 0.2664 <sup>g</sup>                                   | 0.2646                                                |
| 0.50                          | 5.0                            | 1.250                          | 38.06                     | 90.80                     | 100 <sup>g</sup>             | 0.4555                                                            | 0.2277                                                                   | 0.4784 <sup>g</sup>                          | 0.2392 <sup>g</sup>                                   | 0.2436                                                |
| 0.50                          | 5.0                            | 1.111                          | 35.75                     | 85.26                     | 98.99                        | 0.4289                                                            | 0.2144                                                                   | 0.4091                                       | 0.2046                                                | 0.2294                                                |
| 0.50                          | 5.0                            | 1.000                          | 33.92                     | 76.86                     | 93.21                        | 0.4121                                                            | 0.2061                                                                   | 0.3116                                       | 0.1558                                                | 0.2204                                                |
| 0.50                          | 5.0                            | 0.909                          | 32.79                     | 71.06                     | 87.40                        | 0.4021                                                            | 0.2011                                                                   | 0.2486                                       | 0.1243                                                | 0.2151                                                |
| 0.50                          | 5.0                            | 0.833                          | 31.39                     | 68.32                     | 83.81                        | 0.3846                                                            | 0.1923                                                                   | 0.2199                                       | 0.1099                                                | 0.2057                                                |
| 0.50                          | 5.0                            | 0.769                          | 27.46                     | 61.69                     | 79.62                        | 0.3352                                                            | 0.1676                                                                   | 0.1837                                       | 0.0918                                                | 0.1793                                                |
| 0.50                          | 5.0                            | 0.714                          | 26.83                     | 57.20                     | 73.40                        | 0.3306                                                            | 0.1653                                                                   | 0.1543                                       | 0.0772                                                | 0.1769                                                |
| 0.50                          | 5.0                            | 0.667                          | 26.26                     | 54.56                     | 67.26                        | 0.3246                                                            | 0.1623                                                                   | 0.1325                                       | 0.0663                                                | 0.1736                                                |
| 0.50                          | 5.0                            | 0.625                          | 26.81                     | 52.57                     | 62.34                        | 0.3342                                                            | 0.1671                                                                   | 0.1175                                       | 0.0588                                                | 0.1788                                                |
| 0.50                          | 5.0                            | 0.588                          | 27.06                     | 50.37                     | 59.61                        | 0.3402                                                            | 0.1701                                                                   | 0.1091                                       | 0.0545                                                | 0.1820                                                |
| 0.50                          | 5.0                            | 0.556                          | 25.37                     | 46.39                     | 57.17                        | 0.3203                                                            | 0.1602                                                                   | 0.1002                                       | 0.0501                                                | 0.1713                                                |
| 0.50                          | 5.0                            | 0.526                          | 25.81                     | 40.66                     | 50.35                        | 0.3329                                                            | 0.1665                                                                   | 0.0826                                       | 0.0413                                                | 0.1781                                                |
| 0.50                          | 5.0                            | 0.500                          | 24.75                     | 38.23                     | 46.18                        | 0.3198                                                            | 0.1599                                                                   | 0.0736                                       | 0.0368                                                | 0.1711                                                |
| 0.50                          | 5.0                            | 0.476                          | 24.21                     | 34.65                     | 44.91                        | 0.3164                                                            | 0.1582                                                                   | 0.0692                                       | 0.0346                                                | 0.1692                                                |
| 0.50                          | 5.0                            | 0.455                          | 23.53                     | 32.53                     | 43.97                        | 0.3091                                                            | 0.1546                                                                   | 0.0662                                       | 0.0331                                                | 0.1653                                                |
| 0.50                          | 5.0                            | 0.435                          | 22.79                     | 29.49                     | 39.94                        | 0.3015                                                            | 0.1508                                                                   | 0.0583                                       | 0.0291                                                | 0.1613                                                |
| 0.50                          | 5.0                            | 0.417                          | 21.70                     | 29.24                     | 37.77                        | 0.2855                                                            | 0.1428                                                                   | 0.0550                                       | 0.0275                                                | 0.1527                                                |

<sup>a</sup> Data from Table S13, Zhang and Junkers, *Chem. Sci.* 2026, **17**, 4706-4714. <sup>b</sup> Derivative of cubic spline

interpolator of conversion data at  $t = 0$ . <sup>c</sup>  $\left(\frac{d[LLA]}{dt}\right)_0 = \left(\frac{dX}{dt}\right)_0 \cdot [LLA]_0$ . <sup>d</sup> Apparent first-order rate constant

obtained by fitting  $\hat{X} = 1 - \exp(-k_{obs}t)$  to conversion data. <sup>e</sup> Initial rate of monomer consumption

predicted from  $k_{obs}$ . <sup>f</sup> Corrected  $(R_p)_0$  to remove contribution from depolymerization:  $(R_{p,corr})_0 =$

$-(d[LLA]/dt)_0 \times [LLA]_0 / ([LLA]_0 - [LLA]_{eq}) = -(d[LLA]/dt)_0 \times 1.070$ ;  $[LLA]_{eq} = 0.0326$  M (Table S18). <sup>g</sup>  $X_{10}$  set to 99.99% to fit  $k_{obs}$ .

**Table S11.** Initial rate of monomer consumption,  $k_{obs}$  and depolymerization-corrected rate of monomer consumption for catalyst concentration sweep data at 20°C,  $[LLA]_0 = 0.7$  M

| $[LLA]_0$<br>(M) <sup>a</sup> | $[MBA]_0$<br>(mM) <sup>a</sup> | $[TBD]_0$<br>(mM) <sup>a</sup> | $X_1$<br>(%) <sup>a</sup> | $X_5$<br>(%) <sup>a</sup> | $X_{10}$<br>(%) <sup>a</sup> | $\left(\frac{dX}{dt}\right)_0$<br>(s <sup>-1</sup> ) <sup>b</sup> | $\left(\frac{-d[LLA]}{dt}\right)_0$<br>(M·s <sup>-1</sup> ) <sup>c</sup> | $k_{obs}$<br>(s <sup>-1</sup> ) <sup>d</sup> | $k_{obs}[LLA]_0$<br>(M·s <sup>-1</sup> ) <sup>e</sup> | $(R_{p,corr})_0$<br>(M·s <sup>-1</sup> ) <sup>f</sup> |
|-------------------------------|--------------------------------|--------------------------------|---------------------------|---------------------------|------------------------------|-------------------------------------------------------------------|--------------------------------------------------------------------------|----------------------------------------------|-------------------------------------------------------|-------------------------------------------------------|
| 0.70                          | 7.0                            | 3.500                          | 62.23                     | 97.11                     | 100 <sup>g</sup>             | 0.7997                                                            | 0.5598                                                                   | 0.9398 <sup>g</sup>                          | 0.6579 <sup>g</sup>                                   | 0.5871                                                |
| 0.70                          | 7.0                            | 2.800                          | 60.83                     | 96.66                     | 100 <sup>g</sup>             | 0.7798                                                            | 0.5459                                                                   | 0.8977 <sup>g</sup>                          | 0.6284 <sup>g</sup>                                   | 0.5726                                                |
| 0.70                          | 7.0                            | 2.333                          | 57.02                     | 93.00                     | 96.15                        | 0.7283                                                            | 0.5098                                                                   | 0.5915                                       | 0.4141                                                | 0.5347                                                |
| 0.70                          | 7.0                            | 2.000                          | 53.66                     | 89.34                     | 93.11                        | 0.6835                                                            | 0.4785                                                                   | 0.4308                                       | 0.3015                                                | 0.5018                                                |
| 0.70                          | 7.0                            | 1.750                          | 50.61                     | 86.68                     | 90.5                         | 0.6420                                                            | 0.4494                                                                   | 0.3543                                       | 0.2480                                                | 0.4714                                                |
| 0.70                          | 7.0                            | 1.556                          | 48.80                     | 83.98                     | 88.38                        | 0.6188                                                            | 0.4331                                                                   | 0.3111                                       | 0.2177                                                | 0.4543                                                |
| 0.70                          | 7.0                            | 1.400                          | 47.38                     | 81.77                     | 86.02                        | 0.6005                                                            | 0.4203                                                                   | 0.2760                                       | 0.1932                                                | 0.4409                                                |
| 0.70                          | 7.0                            | 1.273                          | 45.67                     | 78.32                     | 84.85                        | 0.5799                                                            | 0.4059                                                                   | 0.2583                                       | 0.1808                                                | 0.4257                                                |
| 0.70                          | 7.0                            | 1.167                          | 45.03                     | 76.79                     | 82.21                        | 0.5720                                                            | 0.4004                                                                   | 0.2328                                       | 0.1630                                                | 0.4200                                                |
| 0.70                          | 7.0                            | 1.077                          | 44.57                     | 74.16                     | 79.50                        | 0.5682                                                            | 0.3978                                                                   | 0.2102                                       | 0.1472                                                | 0.4172                                                |
| 0.70                          | 7.0                            | 1.000                          | 43.75                     | 71.42                     | 78.20                        | 0.5596                                                            | 0.3917                                                                   | 0.1993                                       | 0.1395                                                | 0.4109                                                |
| 0.70                          | 7.0                            | 0.933                          | 42.60                     | 69.05                     | 76.10                        | 0.5456                                                            | 0.3819                                                                   | 0.1852                                       | 0.1296                                                | 0.4005                                                |
| 0.70                          | 7.0                            | 0.875                          | 41.11                     | 66.31                     | 72.68                        | 0.5267                                                            | 0.3687                                                                   | 0.1662                                       | 0.1163                                                | 0.3867                                                |
| 0.70                          | 7.0                            | 0.824                          | 39.23                     | 62.66                     | 68.82                        | 0.5034                                                            | 0.3524                                                                   | 0.1476                                       | 0.1033                                                | 0.3696                                                |
| 0.70                          | 7.0                            | 0.778                          | 38.50                     | 59.96                     | 64.83                        | 0.4955                                                            | 0.3468                                                                   | 0.1319                                       | 0.0923                                                | 0.3638                                                |
| 0.70                          | 7.0                            | 0.737                          | 37.34                     | 57.10                     | 61.93                        | 0.4817                                                            | 0.3372                                                                   | 0.1212                                       | 0.0848                                                | 0.3537                                                |
| 0.70                          | 7.0                            | 0.700                          | 35.23                     | 53.57                     | 59.09                        | 0.4551                                                            | 0.3185                                                                   | 0.1111                                       | 0.0778                                                | 0.3341                                                |
| 0.70                          | 7.0                            | 0.667                          | 34.01                     | 49.65                     | 55.89                        | 0.4418                                                            | 0.3092                                                                   | 0.1008                                       | 0.0705                                                | 0.3244                                                |
| 0.70                          | 7.0                            | 0.636                          | 33.75                     | 46.93                     | 54.00                        | 0.4412                                                            | 0.3088                                                                   | 0.0948                                       | 0.0664                                                | 0.3239                                                |
| 0.70                          | 7.0                            | 0.609                          | 32.05                     | 43.63                     | 52.68                        | 0.4205                                                            | 0.2943                                                                   | 0.0898                                       | 0.0628                                                | 0.3087                                                |
| 0.70                          | 7.0                            | 0.583                          | 30.81                     | 41.64                     | 51.91                        | 0.4049                                                            | 0.2834                                                                   | 0.0868                                       | 0.0607                                                | 0.2973                                                |

<sup>a</sup> Data from Table S13, Zhang and Junkers, *Chem. Sci.* 2026, **17**, 4706-4714. <sup>b</sup> Derivative of cubic spline

interpolator of conversion data at  $t = 0$ . <sup>c</sup>  $\left(\frac{d[LLA]}{dt}\right)_0 = \left(\frac{dX}{dt}\right)_0 \cdot [LLA]_0$ . <sup>d</sup> Apparent first-order rate constant

obtained by fitting  $\hat{X} = 1 - \exp(-k_{obs}t)$  to conversion data. <sup>e</sup> Initial rate of monomer consumption

predicted from  $k_{obs}$ . <sup>f</sup> Corrected  $(R_p)_0$  to remove contribution from depolymerization:  $(R_{p,corr})_0 =$

$-(d[LLA]/dt)_0 \times [LLA]_0 / ([LLA]_0 - [LLA]_{eq}) = -(d[LLA]/dt)_0 \times 1.050$ ;  $[LLA]_{eq} = 0.0326$  M (Table S18). <sup>g</sup>  $X_{10}$  set to 99.99% to fit  $k_{obs}$ .

**Table S12.** Initial rate of monomer consumption,  $k_{obs}$  and depolymerization-corrected rate of monomer consumption for degree of polymerization sweep data at 20°C,  $[LLA]_0 = 0.2$  M

| $[LLA]_0$<br>(M) <sup>a</sup> | $[MBA]_0$<br>(mM) <sup>a</sup> | $[TBD]_0$<br>(mM) <sup>a</sup> | $X_1$<br>(%) <sup>a</sup> | $X_5$<br>(%) <sup>a</sup> | $X_{10}$<br>(%) <sup>a</sup> | $\left(\frac{dX}{dt}\right)_0$<br>(s <sup>-1</sup> ) <sup>b</sup> | $\left(\frac{-d[LLA]}{dt}\right)_0$<br>(M·s <sup>-1</sup> ) <sup>c</sup> | $k_{obs}$<br>(s <sup>-1</sup> ) <sup>d</sup> | $k_{obs}[LLA]_0$<br>(M·s <sup>-1</sup> ) <sup>e</sup> | $(R_{p,corr})_0$<br>(M·s <sup>-1</sup> ) <sup>f</sup> |
|-------------------------------|--------------------------------|--------------------------------|---------------------------|---------------------------|------------------------------|-------------------------------------------------------------------|--------------------------------------------------------------------------|----------------------------------------------|-------------------------------------------------------|-------------------------------------------------------|
| 0.20                          | 4.000                          | 0.667                          | 11.54                     | 48.51                     | 63.88                        | 0.1172                                                            | 0.0234                                                                   | 0.1126                                       | 0.0225                                                | 0.0280                                                |
| 0.20                          | 3.636                          | 0.667                          | 10.97                     | 47.15                     | 60.36                        | 0.1100                                                            | 0.0220                                                                   | 0.1037                                       | 0.0207                                                | 0.0263                                                |
| 0.20                          | 3.333                          | 0.667                          | 11.29                     | 46.49                     | 56.70                        | 0.1148                                                            | 0.0230                                                                   | 0.0959                                       | 0.0192                                                | 0.0274                                                |
| 0.20                          | 3.077                          | 0.667                          | 8.60                      | 43.20                     | 54.62                        | 0.0795                                                            | 0.0159                                                                   | 0.0886                                       | 0.0177                                                | 0.0190                                                |
| 0.20                          | 2.857                          | 0.667                          | 7.56                      | 40.33                     | 53.99                        | 0.0679                                                            | 0.0136                                                                   | 0.0850                                       | 0.0170                                                | 0.0162                                                |
| 0.20                          | 2.667                          | 0.667                          | 8.57                      | 38.74                     | 51.26                        | 0.0842                                                            | 0.0168                                                                   | 0.0795                                       | 0.0159                                                | 0.0201                                                |
| 0.20                          | 2.500                          | 0.667                          | 7.63                      | 38.20                     | 51.63                        | 0.0713                                                            | 0.0143                                                                   | 0.0795                                       | 0.0159                                                | 0.0170                                                |
| 0.20                          | 2.353                          | 0.667                          | 9.91                      | 36.28                     | 49.28                        | 0.1066                                                            | 0.0213                                                                   | 0.0748                                       | 0.0150                                                | 0.0255                                                |
| 0.20                          | 2.222                          | 0.667                          | 7.79                      | 35.41                     | 47.56                        | 0.0765                                                            | 0.0153                                                                   | 0.0711                                       | 0.0142                                                | 0.0183                                                |
| 0.20                          | 2.105                          | 0.667                          | 7.72                      | 32.87                     | 50.19                        | 0.0793                                                            | 0.0159                                                                   | 0.0730                                       | 0.0146                                                | 0.0190                                                |
| 0.20                          | 2.000                          | 0.667                          | 6.55                      | 30.64                     | 48.97                        | 0.0650                                                            | 0.0130                                                                   | 0.0691                                       | 0.0138                                                | 0.0155                                                |
| 0.20                          | 1.905                          | 0.667                          | 8.59                      | 30.16                     | 46.70                        | 0.0949                                                            | 0.0190                                                                   | 0.0661                                       | 0.0132                                                | 0.0227                                                |
| 0.20                          | 1.818                          | 0.667                          | 6.60                      | 28.97                     | 48.37                        | 0.0678                                                            | 0.0136                                                                   | 0.0669                                       | 0.0134                                                | 0.0162                                                |
| 0.20                          | 1.739                          | 0.667                          | 8.55                      | 27.99                     | 46.22                        | 0.0971                                                            | 0.0194                                                                   | 0.0637                                       | 0.0127                                                | 0.0232                                                |
| 0.20                          | 1.667                          | 0.667                          | 6.64                      | 26.28                     | 47.17                        | 0.0717                                                            | 0.0143                                                                   | 0.0630                                       | 0.0126                                                | 0.0171                                                |
| 0.20                          | 1.600                          | 0.667                          | 7.22                      | 25.96                     | 44.39                        | 0.0800                                                            | 0.0160                                                                   | 0.0594                                       | 0.0119                                                | 0.0191                                                |
| 0.20                          | 1.538                          | 0.667                          | 8.73                      | 25.46                     | 45.45                        | 0.1029                                                            | 0.0206                                                                   | 0.0606                                       | 0.0121                                                | 0.0246                                                |
| 0.20                          | 1.481                          | 0.667                          | 7.50                      | 24.05                     | 43.61                        | 0.0864                                                            | 0.0173                                                                   | 0.0570                                       | 0.0114                                                | 0.0207                                                |
| 0.20                          | 1.429                          | 0.667                          | 8.17                      | 25.17                     | 40.63                        | 0.0941                                                            | 0.0188                                                                   | 0.0543                                       | 0.0109                                                | 0.0225                                                |
| 0.20                          | 1.379                          | 0.667                          | 10.20                     | 25.44                     | 38.27                        | 0.1229                                                            | 0.0246                                                                   | 0.0519                                       | 0.0104                                                | 0.0294                                                |
| 0.20                          | 1.333                          | 0.667                          | 9.94                      | 23.12                     | 36.64                        | 0.1218                                                            | 0.0244                                                                   | 0.0483                                       | 0.0097                                                | 0.0291                                                |

<sup>a</sup> Data from Table S17, Zhang and Junkers, *Chem. Sci.* 2026, **17**, 4706-4714. <sup>b</sup> Derivative of cubic spline

interpolator of conversion data at  $t = 0$ . <sup>c</sup>  $\left(\frac{d[LLA]}{dt}\right)_0 = \left(\frac{dX}{dt}\right)_0 \cdot [LLA]_0$ . <sup>d</sup> Apparent first-order rate constant obtained by fitting  $\hat{X} = 1 - \exp(-k_{obs}t)$  to conversion data. <sup>e</sup> Initial rate of monomer consumption predicted from  $k_{obs}$ . <sup>f</sup> Corrected  $(R_p)_0$  to remove contribution from depolymerization:  $(R_{p,corr})_0 = -(d[LLA]/dt)_0 \times [LLA]_0 / ([LLA]_0 - [LLA]_{eq}) = -(d[LLA]/dt)_0 \times 1.195$ ;  $[LLA]_{eq} = 0.0326$  M (Table S18).

**Table S13.** Initial rate of monomer consumption,  $k_{obs}$  and depolymerization-corrected rate of monomer consumption for degree of polymerization sweep data at 20°C,  $[LLA]_0 = 0.35$  M

| $[LLA]_0$<br>(M) <sup>a</sup> | $[MBA]_0$<br>(mM) <sup>a</sup> | $[TBD]_0$<br>(mM) <sup>a</sup> | $X_1$<br>(%) <sup>a</sup> | $X_5$<br>(%) <sup>a</sup> | $X_{10}$<br>(%) <sup>a</sup> | $\left(\frac{dX}{dt}\right)_0$<br>(s <sup>-1</sup> ) <sup>b</sup> | $\left(\frac{-d[LLA]}{dt}\right)_0$<br>(M·s <sup>-1</sup> ) <sup>c</sup> | $k_{obs}$<br>(s <sup>-1</sup> ) <sup>d</sup> | $k_{obs}[LLA]_0$<br>(M·s <sup>-1</sup> ) <sup>e</sup> | $(R_{p,corr})_0$<br>(M·s <sup>-1</sup> ) <sup>f</sup> |
|-------------------------------|--------------------------------|--------------------------------|---------------------------|---------------------------|------------------------------|-------------------------------------------------------------------|--------------------------------------------------------------------------|----------------------------------------------|-------------------------------------------------------|-------------------------------------------------------|
| 0.35                          | 7.000                          | 1.167                          | 23.42                     | 57.56                     | 73.85                        | 0.2805                                                            | 0.0982                                                                   | 0.1547                                       | 0.0542                                                | 0.1083                                                |
| 0.35                          | 6.364                          | 1.167                          | 23.24                     | 57.10                     | 72.40                        | 0.2782                                                            | 0.0974                                                                   | 0.1495                                       | 0.0523                                                | 0.1074                                                |
| 0.35                          | 5.833                          | 1.167                          | 22.98                     | 54.99                     | 71.65                        | 0.2771                                                            | 0.0970                                                                   | 0.1443                                       | 0.0505                                                | 0.1069                                                |
| 0.35                          | 5.385                          | 1.167                          | 22.72                     | 53.59                     | 71.52                        | 0.2751                                                            | 0.0963                                                                   | 0.1419                                       | 0.0497                                                | 0.1062                                                |
| 0.35                          | 5.000                          | 1.167                          | 22.32                     | 54.07                     | 70.60                        | 0.2684                                                            | 0.0939                                                                   | 0.1399                                       | 0.0490                                                | 0.1036                                                |
| 0.35                          | 4.667                          | 1.167                          | 21.87                     | 52.55                     | 69.28                        | 0.2636                                                            | 0.0923                                                                   | 0.1342                                       | 0.0470                                                | 0.1017                                                |
| 0.35                          | 4.375                          | 1.167                          | 21.10                     | 51.85                     | 68.74                        | 0.2532                                                            | 0.0886                                                                   | 0.1316                                       | 0.0461                                                | 0.0977                                                |
| 0.35                          | 4.118                          | 1.167                          | 20.44                     | 49.33                     | 67.82                        | 0.2467                                                            | 0.0863                                                                   | 0.1259                                       | 0.0441                                                | 0.0952                                                |
| 0.35                          | 3.889                          | 1.167                          | 19.88                     | 48.98                     | 67.14                        | 0.2389                                                            | 0.0836                                                                   | 0.1237                                       | 0.0433                                                | 0.0922                                                |
| 0.35                          | 3.684                          | 1.167                          | 19.37                     | 47.86                     | 66.32                        | 0.2327                                                            | 0.0815                                                                   | 0.1203                                       | 0.0421                                                | 0.0898                                                |
| 0.35                          | 3.500                          | 1.167                          | 18.69                     | 47.18                     | 65.50                        | 0.2235                                                            | 0.0782                                                                   | 0.1174                                       | 0.0411                                                | 0.0863                                                |
| 0.35                          | 3.333                          | 1.167                          | 18.19                     | 46.36                     | 65.06                        | 0.2172                                                            | 0.0760                                                                   | 0.1153                                       | 0.0404                                                | 0.0838                                                |
| 0.35                          | 3.182                          | 1.167                          | 17.09                     | 45.74                     | 64.28                        | 0.2019                                                            | 0.0707                                                                   | 0.1126                                       | 0.0394                                                | 0.0779                                                |
| 0.35                          | 3.043                          | 1.167                          | 16.61                     | 44.73                     | 63.69                        | 0.1961                                                            | 0.0686                                                                   | 0.1100                                       | 0.0385                                                | 0.0757                                                |
| 0.35                          | 2.917                          | 1.167                          | 16.21                     | 43.60                     | 63.04                        | 0.1916                                                            | 0.0671                                                                   | 0.1073                                       | 0.0376                                                | 0.0739                                                |
| 0.35                          | 2.800                          | 1.167                          | 15.69                     | 42.81                     | 62.33                        | 0.1849                                                            | 0.0647                                                                   | 0.1049                                       | 0.0367                                                | 0.0714                                                |
| 0.35                          | 2.692                          | 1.167                          | 15.08                     | 42.16                     | 60.35                        | 0.1765                                                            | 0.0618                                                                   | 0.1003                                       | 0.0351                                                | 0.0681                                                |
| 0.35                          | 2.593                          | 1.167                          | 14.60                     | 41.85                     | 59.03                        | 0.1696                                                            | 0.0594                                                                   | 0.0974                                       | 0.0341                                                | 0.0655                                                |
| 0.35                          | 2.500                          | 1.167                          | 14.27                     | 40.96                     | 56.63                        | 0.1655                                                            | 0.0579                                                                   | 0.0921                                       | 0.0322                                                | 0.0639                                                |
| 0.35                          | 2.414                          | 1.167                          | 14.12                     | 39.02                     | 55.62                        | 0.1657                                                            | 0.0580                                                                   | 0.0885                                       | 0.0310                                                | 0.0639                                                |
| 0.35                          | 2.333                          | 1.167                          | 13.89                     | 37.86                     | 54.13                        | 0.1635                                                            | 0.0572                                                                   | 0.0849                                       | 0.0297                                                | 0.0631                                                |

<sup>a</sup> Data from Table S18, Zhang and Junkers, *Chem. Sci.* 2026, **17**, 4706-4714. <sup>b</sup> Derivative of cubic spline

interpolator of conversion data at  $t = 0$ . <sup>c</sup>  $\left(\frac{d[LLA]}{dt}\right)_0 = \left(\frac{dX}{dt}\right)_0 \cdot [LLA]_0$ . <sup>d</sup> Apparent first-order rate constant obtained by fitting  $\hat{X} = 1 - \exp(-k_{obs}t)$  to conversion data. <sup>e</sup> Initial rate of monomer consumption predicted from  $k_{obs}$ . <sup>f</sup> Corrected  $(R_p)_0$  to remove contribution from depolymerization:  $(R_{p,corr})_0 = -(d[LLA]/dt)_0 \times [LLA]_0 / ([LLA]_0 - [LLA]_{eq}) = -(d[LLA]/dt)_0 \times 1.103$ ;  $[LLA]_{eq} = 0.0326$  M (Table S18).

**Table S14.** Initial rate of monomer consumption,  $k_{obs}$  and depolymerization-corrected rate of monomer consumption for degree of polymerization sweep data at 20°C,  $[LLA]_0 = 0.5$  M

| $[LLA]_0$<br>(M) <sup>a</sup> | $[MBA]_0$<br>(mM) <sup>a</sup> | $[TBD]_0$<br>(mM) <sup>a</sup> | $X_1$<br>(%) <sup>a</sup> | $X_5$<br>(%) <sup>a</sup> | $X_{10}$<br>(%) <sup>a</sup> | $\left(\frac{dX}{dt}\right)_0$<br>(s <sup>-1</sup> ) <sup>b</sup> | $\left(\frac{-d[LLA]}{dt}\right)_0$<br>(M·s <sup>-1</sup> ) <sup>c</sup> | $k_{obs}$<br>(s <sup>-1</sup> ) <sup>d</sup> | $k_{obs}[LLA]_0$<br>(M·s <sup>-1</sup> ) <sup>e</sup> | $(R_{p,corr})_0$<br>(M·s <sup>-1</sup> ) <sup>f</sup> |
|-------------------------------|--------------------------------|--------------------------------|---------------------------|---------------------------|------------------------------|-------------------------------------------------------------------|--------------------------------------------------------------------------|----------------------------------------------|-------------------------------------------------------|-------------------------------------------------------|
| 0.50                          | 10.00                          | 1.667                          | 31.35                     | 65.82                     | 93.03                        | 0.3891                                                            | 0.1946                                                                   | 0.2408                                       | 0.1204                                                | 0.2081                                                |
| 0.50                          | 9.091                          | 1.667                          | 30.97                     | 63.13                     | 92.84                        | 0.3871                                                            | 0.1935                                                                   | 0.2256                                       | 0.1128                                                | 0.2070                                                |
| 0.50                          | 8.333                          | 1.667                          | 30.96                     | 62.70                     | 91.75                        | 0.3873                                                            | 0.1936                                                                   | 0.2227                                       | 0.1114                                                | 0.2072                                                |
| 0.50                          | 7.692                          | 1.667                          | 29.99                     | 59.78                     | 90.06                        | 0.3767                                                            | 0.1883                                                                   | 0.2064                                       | 0.1032                                                | 0.2015                                                |
| 0.50                          | 7.143                          | 1.667                          | 29.06                     | 57.40                     | 87.71                        | 0.3658                                                            | 0.1829                                                                   | 0.1929                                       | 0.0965                                                | 0.1956                                                |
| 0.50                          | 6.667                          | 1.667                          | 28.32                     | 55.03                     | 86.46                        | 0.3578                                                            | 0.1789                                                                   | 0.1818                                       | 0.0909                                                | 0.1914                                                |
| 0.50                          | 6.250                          | 1.667                          | 28.38                     | 56.19                     | 88.85                        | 0.3577                                                            | 0.1788                                                                   | 0.1886                                       | 0.0943                                                | 0.1913                                                |
| 0.50                          | 5.882                          | 1.667                          | 28.75                     | 53.64                     | 86.65                        | 0.3660                                                            | 0.1830                                                                   | 0.1771                                       | 0.0885                                                | 0.1958                                                |
| 0.50                          | 5.556                          | 1.667                          | 27.83                     | 54.63                     | 84.59                        | 0.3508                                                            | 0.1754                                                                   | 0.1775                                       | 0.0887                                                | 0.1877                                                |
| 0.50                          | 5.263                          | 1.667                          | 27.82                     | 54.02                     | 81.30                        | 0.3508                                                            | 0.1754                                                                   | 0.1696                                       | 0.0848                                                | 0.1877                                                |
| 0.50                          | 5.000                          | 1.667                          | 26.90                     | 53.48                     | 82.17                        | 0.3383                                                            | 0.1692                                                                   | 0.1692                                       | 0.0846                                                | 0.1810                                                |
| 0.50                          | 4.762                          | 1.667                          | 27.29                     | 54.27                     | 78.49                        | 0.3422                                                            | 0.1711                                                                   | 0.1635                                       | 0.0817                                                | 0.1830                                                |
| 0.50                          | 4.545                          | 1.667                          | 25.29                     | 53.06                     | 79.19                        | 0.3148                                                            | 0.1574                                                                   | 0.1612                                       | 0.0806                                                | 0.1684                                                |
| 0.50                          | 4.348                          | 1.667                          | 24.25                     | 50.51                     | 78.53                        | 0.3028                                                            | 0.1514                                                                   | 0.1530                                       | 0.0765                                                | 0.1620                                                |
| 0.50                          | 4.167                          | 1.667                          | 25.49                     | 49.71                     | 77.60                        | 0.3218                                                            | 0.1609                                                                   | 0.1499                                       | 0.0750                                                | 0.1721                                                |
| 0.50                          | 4.000                          | 1.667                          | 24.35                     | 50.85                     | 76.99                        | 0.3035                                                            | 0.1518                                                                   | 0.1508                                       | 0.0754                                                | 0.1624                                                |
| 0.50                          | 3.846                          | 1.667                          | 24.15                     | 51.00                     | 75.59                        | 0.3002                                                            | 0.1501                                                                   | 0.1480                                       | 0.0740                                                | 0.1605                                                |
| 0.50                          | 3.704                          | 1.667                          | 24.15                     | 51.17                     | 74.22                        | 0.2997                                                            | 0.1498                                                                   | 0.1452                                       | 0.0726                                                | 0.1603                                                |
| 0.50                          | 3.571                          | 1.667                          | 22.73                     | 51.77                     | 73.29                        | 0.2780                                                            | 0.1390                                                                   | 0.1435                                       | 0.0717                                                | 0.1487                                                |
| 0.50                          | 3.448                          | 1.667                          | 21.14                     | 52.00                     | 72.75                        | 0.2544                                                            | 0.1272                                                                   | 0.1419                                       | 0.0709                                                | 0.1361                                                |
| 0.50                          | 3.333                          | 1.667                          | 18.76                     | 51.67                     | 69.51                        | 0.2195                                                            | 0.1097                                                                   | 0.1323                                       | 0.0662                                                | 0.1174                                                |

<sup>a</sup> Data from Table S19, Zhang and Junkers, *Chem. Sci.* 2026, **17**, 4706-4714. <sup>b</sup> Derivative of cubic spline

interpolator of conversion data at  $t = 0$ . <sup>c</sup>  $\left(\frac{d[LLA]}{dt}\right)_0 = \left(\frac{dX}{dt}\right)_0 \cdot [LLA]_0$ . <sup>d</sup> Apparent first-order rate constant obtained by fitting  $\hat{X} = 1 - \exp(-k_{obs}t)$  to conversion data. <sup>e</sup> Initial rate of monomer consumption predicted from  $k_{obs}$ . <sup>f</sup> Corrected  $(R_p)_0$  to remove contribution from depolymerization:  $(R_{p,corr})_0 = -(d[LLA]/dt)_0 \times [LLA]_0 / ([LLA]_0 - [LLA]_{eq}) = -(d[LLA]/dt)_0 \times 1.070$ ;  $[LLA]_{eq} = 0.0326$  M (Table S18).

**Table S15.** Initial rate of monomer consumption,  $k_{obs}$  and depolymerization-corrected rate of monomer consumption for degree of polymerization sweep data at 20°C,  $[LLA]_0 = 0.7$  M

| $[LLA]_0$<br>(M) <sup>a</sup> | $[MBA]_0$<br>(mM) <sup>a</sup> | $[TBD]_0$<br>(mM) <sup>a</sup> | $X_1$<br>(%) <sup>a</sup> | $X_5$<br>(%) <sup>a</sup> | $X_{10}$<br>(%) <sup>a</sup> | $\left(\frac{dX}{dt}\right)_0$<br>(s <sup>-1</sup> ) <sup>b</sup> | $\left(\frac{-d[LLA]}{dt}\right)_0$<br>(M·s <sup>-1</sup> ) <sup>c</sup> | $k_{obs}$<br>(s <sup>-1</sup> ) <sup>d</sup> | $k_{obs}[LLA]_0$<br>(M·s <sup>-1</sup> ) <sup>e</sup> | $(R_{p,corr})_0$<br>(M·s <sup>-1</sup> ) <sup>f</sup> |
|-------------------------------|--------------------------------|--------------------------------|---------------------------|---------------------------|------------------------------|-------------------------------------------------------------------|--------------------------------------------------------------------------|----------------------------------------------|-------------------------------------------------------|-------------------------------------------------------|
| 0.70                          | 14.00                          | 2.333                          | 47.19                     | 89.34                     | 98.31                        | 0.5902                                                            | 0.4132                                                                   | 0.5357                                       | 0.3750                                                | 0.4333                                                |
| 0.70                          | 12.73                          | 2.333                          | 46.85                     | 87.8                      | 98.04                        | 0.5872                                                            | 0.4111                                                                   | 0.5054                                       | 0.3537                                                | 0.4311                                                |
| 0.70                          | 11.67                          | 2.333                          | 44.86                     | 85.63                     | 97.85                        | 0.5610                                                            | 0.3927                                                                   | 0.4605                                       | 0.3224                                                | 0.4119                                                |
| 0.70                          | 10.77                          | 2.333                          | 42.57                     | 84.34                     | 97.37                        | 0.5292                                                            | 0.3705                                                                   | 0.4302                                       | 0.3012                                                | 0.3886                                                |
| 0.70                          | 10.00                          | 2.333                          | 43.13                     | 84.21                     | 97.06                        | 0.5375                                                            | 0.3763                                                                   | 0.4289                                       | 0.3002                                                | 0.3946                                                |
| 0.70                          | 9.333                          | 2.333                          | 42.75                     | 83.49                     | 96.60                        | 0.5328                                                            | 0.3730                                                                   | 0.4155                                       | 0.2909                                                | 0.3912                                                |
| 0.70                          | 8.750                          | 2.333                          | 41.83                     | 83.13                     | 96.39                        | 0.5198                                                            | 0.3639                                                                   | 0.4066                                       | 0.2846                                                | 0.3817                                                |
| 0.70                          | 8.235                          | 2.333                          | 39.76                     | 82.14                     | 96.14                        | 0.4909                                                            | 0.3436                                                                   | 0.3873                                       | 0.2711                                                | 0.3604                                                |
| 0.70                          | 7.778                          | 2.333                          | 39.82                     | 81.75                     | 95.85                        | 0.4922                                                            | 0.3446                                                                   | 0.3818                                       | 0.2673                                                | 0.3614                                                |
| 0.70                          | 7.368                          | 2.333                          | 38.68                     | 81.56                     | 95.53                        | 0.4758                                                            | 0.3331                                                                   | 0.3741                                       | 0.2619                                                | 0.3493                                                |
| 0.70                          | 7.000                          | 2.333                          | 37.00                     | 80.81                     | 95.27                        | 0.4522                                                            | 0.3166                                                                   | 0.3605                                       | 0.2523                                                | 0.3320                                                |
| 0.70                          | 6.667                          | 2.333                          | 37.43                     | 79.47                     | 95.58                        | 0.4603                                                            | 0.3222                                                                   | 0.3524                                       | 0.2467                                                | 0.3380                                                |
| 0.70                          | 6.364                          | 2.333                          | 35.07                     | 78.97                     | 95.31                        | 0.4265                                                            | 0.2986                                                                   | 0.3401                                       | 0.2380                                                | 0.3132                                                |
| 0.70                          | 6.087                          | 2.333                          | 34.91                     | 78.22                     | 95.14                        | 0.4251                                                            | 0.2976                                                                   | 0.3331                                       | 0.2332                                                | 0.3121                                                |
| 0.70                          | 5.833                          | 2.333                          | 35.21                     | 76.68                     | 94.69                        | 0.4315                                                            | 0.3020                                                                   | 0.3206                                       | 0.2244                                                | 0.3168                                                |
| 0.70                          | 5.600                          | 2.333                          | 35.08                     | 75.12                     | 94.37                        | 0.4315                                                            | 0.3021                                                                   | 0.3079                                       | 0.2155                                                | 0.3168                                                |
| 0.70                          | 5.385                          | 2.333                          | 33.75                     | 74.79                     | 94.50                        | 0.4126                                                            | 0.2888                                                                   | 0.3031                                       | 0.2122                                                | 0.3029                                                |
| 0.70                          | 5.185                          | 2.333                          | 31.83                     | 74.43                     | 94.54                        | 0.3851                                                            | 0.2696                                                                   | 0.2964                                       | 0.2075                                                | 0.2827                                                |
| 0.70                          | 5.000                          | 2.333                          | 31.52                     | 75.38                     | 94.46                        | 0.3793                                                            | 0.2655                                                                   | 0.3016                                       | 0.2112                                                | 0.2785                                                |
| 0.70                          | 4.828                          | 2.333                          | 30.18                     | 73.03                     | 94.28                        | 0.3628                                                            | 0.2540                                                                   | 0.2831                                       | 0.1981                                                | 0.2664                                                |
| 0.70                          | 4.667                          | 2.333                          | 29.57                     | 74.68                     | 94.41                        | 0.3518                                                            | 0.2462                                                                   | 0.2921                                       | 0.2045                                                | 0.2583                                                |

<sup>a</sup> Data from Table S20, Zhang and Junkers, *Chem. Sci.* 2026, **17**, 4706-4714. <sup>b</sup> Derivative of cubic spline

interpolator of conversion data at  $t = 0$ . <sup>c</sup>  $\left(\frac{d[LLA]}{dt}\right)_0 = \left(\frac{dX}{dt}\right)_0 \cdot [LLA]_0$ . <sup>d</sup> Apparent first-order rate constant obtained by fitting  $\hat{X} = 1 - \exp(-k_{obs}t)$  to conversion data. <sup>e</sup> Initial rate of monomer consumption predicted from  $k_{obs}$ . <sup>f</sup> Corrected  $(R_p)_0$  to remove contribution from depolymerization:  $(R_{p,corr})_0 = -(d[LLA]/dt)_0 \times [LLA]_0 / ([LLA]_0 - [LLA]_{eq}) = -(d[LLA]/dt)_0 \times 1.049$ ;  $[LLA]_{eq} = 0.0326$  M (Table S18).

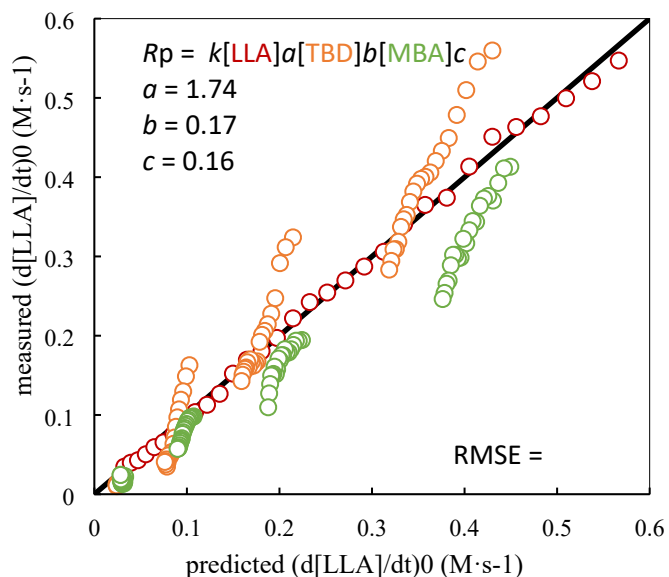

**Figure S2.** Comparison of predicted and measured initial rates for all experiments fit simultaneously. Red: monomer concentration sweep (Tables S3-S7); orange: catalyst-to-monomer sweep (Tables S8-S10); green: DP sweep (Tables S11-S15).

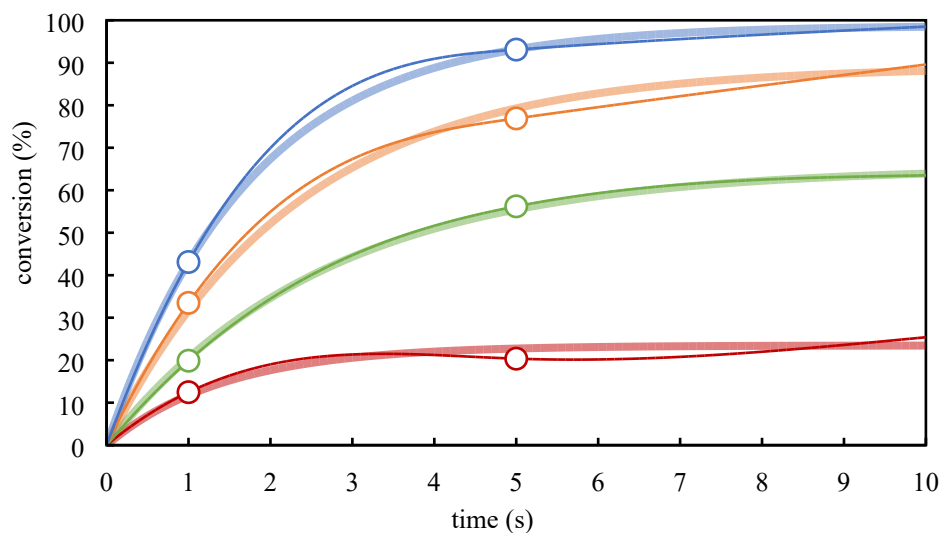

**Figure S3.** Conversion data from monomer concentration sweep experiments at 35°C,  $[\text{LLA}]_0 = 0.2$  M (red), 0.4 M (green), 0.6 M (orange) and 0.8 M (blue),  $[\text{LLA}]:[\text{MBA}]:[\text{TBD}] = 100:1:0.5$ . Broad lines show best fit to a first-order model incorporating a reversible propagation step with equilibrium monomer concentration  $[\text{LLA}]_{\text{eq}}$  (conversion =  $(1 - [\text{LLA}]_{\text{eq}}/[\text{LLA}]_0)(1 - \exp(-k_{\text{obs}} \cdot t))$ ). Narrow lines show cubic spline fit.

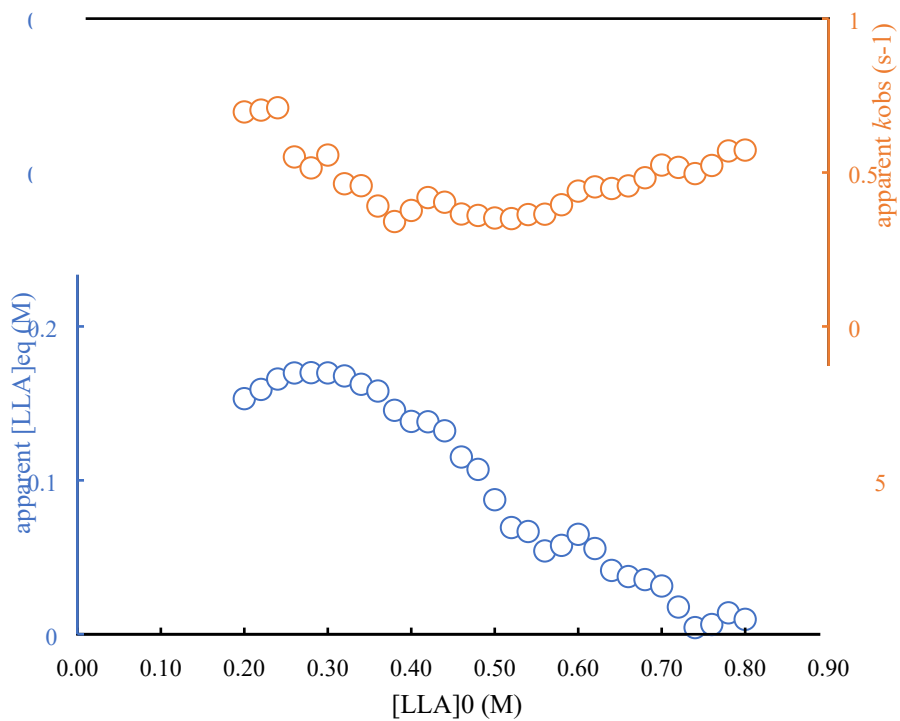

**Figure S4.** Fitted values of  $k_{obs}$  (orange, scale at right) and  $[LLA]_{eq}$  (blue, scale at left) as a function of initial LLA concentration  $[LLA]_0$ . Values obtained by fitting conversion data from monomer sweep experiments at 35°C (Table S3) to a first order kinetic model with a reversible depropagation step:  $conversion = (1 - [LLA]_{eq}/[LLA]_0)(1 - \exp(-k_{obs} \cdot t))$ .

**Table S16.** Apparent first-order rate constant and equilibrium L-lactide concentration for monomer concentration sweep data at 35°C (reversible propagation model)

| [LLA] <sub>0</sub><br>(M) <sup>a</sup> | [MBA] <sub>0</sub><br>(mM) <sup>a</sup> | [TBD] <sub>0</sub><br>(mM) <sup>a</sup> | X <sub>1</sub><br>(%) <sup>a</sup> | X <sub>5</sub><br>(%) <sup>a</sup> | X <sub>10</sub><br>(%) <sup>a</sup> | [LLA] <sub>eq</sub><br>(M) <sup>b</sup> | k <sub>obs</sub><br>(s <sup>-1</sup> ) <sup>b</sup> | k <sub>obs</sub> ([LLA] <sub>0</sub> - [LLA] <sub>eq</sub> )<br>(M·s <sup>-1</sup> ) <sup>c</sup> |
|----------------------------------------|-----------------------------------------|-----------------------------------------|------------------------------------|------------------------------------|-------------------------------------|-----------------------------------------|-----------------------------------------------------|---------------------------------------------------------------------------------------------------|
| 0.20                                   | 2.0                                     | 1.0                                     | 12.47                              | 20.36                              | 25.40                               | 0.1531                                  | 0.6968                                              | 0.0327                                                                                            |
| 0.22                                   | 2.2                                     | 1.1                                     | 14.42                              | 25.33                              | 28.94                               | 0.1591                                  | 0.7029                                              | 0.0428                                                                                            |
| 0.24                                   | 2.4                                     | 1.2                                     | 16.16                              | 28.44                              | 32.20                               | 0.1658                                  | 0.7105                                              | 0.0527                                                                                            |
| 0.26                                   | 2.6                                     | 1.3                                     | 15.56                              | 30.77                              | 35.82                               | 0.1698                                  | 0.5506                                              | 0.0497                                                                                            |
| 0.28                                   | 2.8                                     | 1.4                                     | 16.02                              | 35.96                              | 39.32                               | 0.1700                                  | 0.5150                                              | 0.0567                                                                                            |
| 0.30                                   | 3.0                                     | 1.5                                     | 18.13                              | 41.53                              | 42.64                               | 0.1698                                  | 0.5567                                              | 0.0725                                                                                            |
| 0.32                                   | 3.2                                     | 1.6                                     | 17.39                              | 43.23                              | 46.85                               | 0.1678                                  | 0.4635                                              | 0.0705                                                                                            |
| 0.34                                   | 3.4                                     | 1.7                                     | 18.37                              | 48.06                              | 50.95                               | 0.1624                                  | 0.4572                                              | 0.0812                                                                                            |
| 0.36                                   | 3.6                                     | 1.8                                     | 18.62                              | 47.64                              | 55.29                               | 0.1580                                  | 0.3911                                              | 0.0790                                                                                            |
| 0.38                                   | 3.8                                     | 1.9                                     | 18.46                              | 49.86                              | 60.00                               | 0.1455                                  | 0.3408                                              | 0.0799                                                                                            |
| 0.40                                   | 4.0                                     | 2.0                                     | 19.88                              | 56.21                              | 63.50                               | 0.1383                                  | 0.3768                                              | 0.0986                                                                                            |
| 0.42                                   | 4.2                                     | 2.1                                     | 22.33                              | 59.65                              | 65.62                               | 0.1381                                  | 0.4187                                              | 0.1180                                                                                            |
| 0.44                                   | 4.4                                     | 2.2                                     | 23.06                              | 60.86                              | 68.60                               | 0.1322                                  | 0.4035                                              | 0.1242                                                                                            |
| 0.46                                   | 4.6                                     | 2.3                                     | 22.09                              | 63.79                              | 72.52                               | 0.1152                                  | 0.3653                                              | 0.1260                                                                                            |
| 0.48                                   | 4.8                                     | 2.4                                     | 24.27                              | 64.10                              | 76.01                               | 0.1071                                  | 0.3606                                              | 0.1345                                                                                            |
| 0.50                                   | 5.0                                     | 2.5                                     | 26.17                              | 66.66                              | 81.01                               | 0.0874                                  | 0.3523                                              | 0.1454                                                                                            |
| 0.52                                   | 5.2                                     | 2.6                                     | 27.29                              | 69.95                              | 84.98                               | 0.0693                                  | 0.3503                                              | 0.1579                                                                                            |
| 0.54                                   | 5.4                                     | 2.7                                     | 28.35                              | 71.67                              | 86.29                               | 0.0668                                  | 0.3634                                              | 0.1720                                                                                            |
| 0.56                                   | 5.6                                     | 2.8                                     | 27.76                              | 75.58                              | 88.07                               | 0.0541                                  | 0.3647                                              | 0.1845                                                                                            |
| 0.58                                   | 5.8                                     | 2.9                                     | 30.05                              | 76.82                              | 88.76                               | 0.0578                                  | 0.3954                                              | 0.2065                                                                                            |
| 0.60                                   | 6.0                                     | 3.0                                     | 33.49                              | 76.90                              | 89.59                               | 0.0649                                  | 0.4397                                              | 0.2353                                                                                            |
| 0.62                                   | 6.2                                     | 3.1                                     | 34.36                              | 79.91                              | 91.12                               | 0.0557                                  | 0.4534                                              | 0.2558                                                                                            |
| 0.64                                   | 6.4                                     | 3.2                                     | 33.82                              | 83.51                              | 92.50                               | 0.0415                                  | 0.4481                                              | 0.2682                                                                                            |
| 0.66                                   | 6.6                                     | 3.3                                     | 34.62                              | 84.64                              | 93.38                               | 0.0375                                  | 0.4566                                              | 0.2843                                                                                            |
| 0.68                                   | 6.8                                     | 3.4                                     | 36.66                              | 85.76                              | 94.39                               | 0.0355                                  | 0.4831                                              | 0.3113                                                                                            |
| 0.70                                   | 7.0                                     | 3.5                                     | 39.32                              | 87.95                              | 95.46                               | 0.0313                                  | 0.5243                                              | 0.3506                                                                                            |
| 0.72                                   | 7.2                                     | 3.6                                     | 39.75                              | 89.49                              | 97.47                               | 0.0177                                  | 0.5167                                              | 0.3629                                                                                            |
| 0.74                                   | 7.4                                     | 3.7                                     | 39.59                              | 89.99                              | 99.49                               | 0.0043                                  | 0.4965                                              | 0.3653                                                                                            |
| 0.76                                   | 7.6                                     | 3.8                                     | 41.03                              | 90.74                              | 99.46                               | 0.0063                                  | 0.5229                                              | 0.3941                                                                                            |
| 0.78                                   | 7.8                                     | 3.9                                     | 42.89                              | 92.09                              | 98.22                               | 0.0139                                  | 0.5701                                              | 0.4368                                                                                            |
| 0.80                                   | 8.0                                     | 4.0                                     | 43.11                              | 93.10                              | 98.51                               | 0.0097                                  | 0.5729                                              | 0.4528                                                                                            |

<sup>a</sup> Data from Table S6, Zhang and Junkers, *Chem. Sci.* 2026, **17**, 4706-4714. <sup>b</sup> Apparent equilibrium monomer concentration [LLA]<sub>eq</sub> and first-order rate constant k<sub>obs</sub> obtained by fitting

$$X = \left(1 - \frac{[LLA]_{eq}}{[LLA]_0}\right) (1 - \exp(-k_{obs}t))$$

to conversion data. <sup>c</sup> Initial rate of monomer consumption predicted from [LLA]<sub>eq</sub> and k<sub>obs</sub>.

**Table S17.** Selected literature data for  $[LLA]_{eq}$  at 20°C

| catalyst <sup>a</sup> | solvent | temperature <sup>b</sup> | $\Delta H$<br>(kJ/mol) | $\Delta S$<br>(J/mol/K) | $[LLA]_{eq}$ at 20°C<br>(M) <sup>c</sup> | reference <sup>d</sup> |
|-----------------------|---------|--------------------------|------------------------|-------------------------|------------------------------------------|------------------------|
| Sn(Oct) <sub>2</sub>  | dioxane | 80-133°C                 | -22.9                  | -41.1                   | 0.012                                    | 7                      |
| Sn(Oct) <sub>2</sub>  | bulk    | 180-220°C                | -23.3                  | -22.0                   | 0.001                                    | 8                      |
| DBU                   | dioxane | 55-85°C                  | -15.1 <sup>e</sup>     | -23.1 <sup>e</sup>      | 0.033                                    | 9                      |

<sup>a</sup> Sn(Oct)<sub>2</sub>: tin(II) 2-ethylhexanoate; DBU: 1,8-diazabicyclo(5.4.0)undec-7-ene. <sup>b</sup> range of temperatures used to calculate thermodynamic parameters. <sup>c</sup>  $[LLA]_{eq} = \exp(\Delta H/RT - \Delta S/R)$ . <sup>d</sup> numbers refer to references in main article. <sup>e</sup> calculated from data in reference 9, Supporting Table 3.

**Table S18.** Estimated equilibrium lactide concentrations,  $[LLA]_{eq}$ <sup>a</sup>

| T (°C) | $[LLA]_{eq}$ (M) |
|--------|------------------|
| 0      | 0.0207           |
| 10     | 0.0262           |
| 20     | 0.0326           |
| 30     | 0.0400           |
| 35     | 0.0441           |

<sup>a</sup> calculated from data in reference 9, Supporting Table 3 ( $\Delta H = -15.1$  kJ/mol,  $\Delta S = -23.1$  J/mol/K). See Table S17, entry 3 for details of reaction conditions.

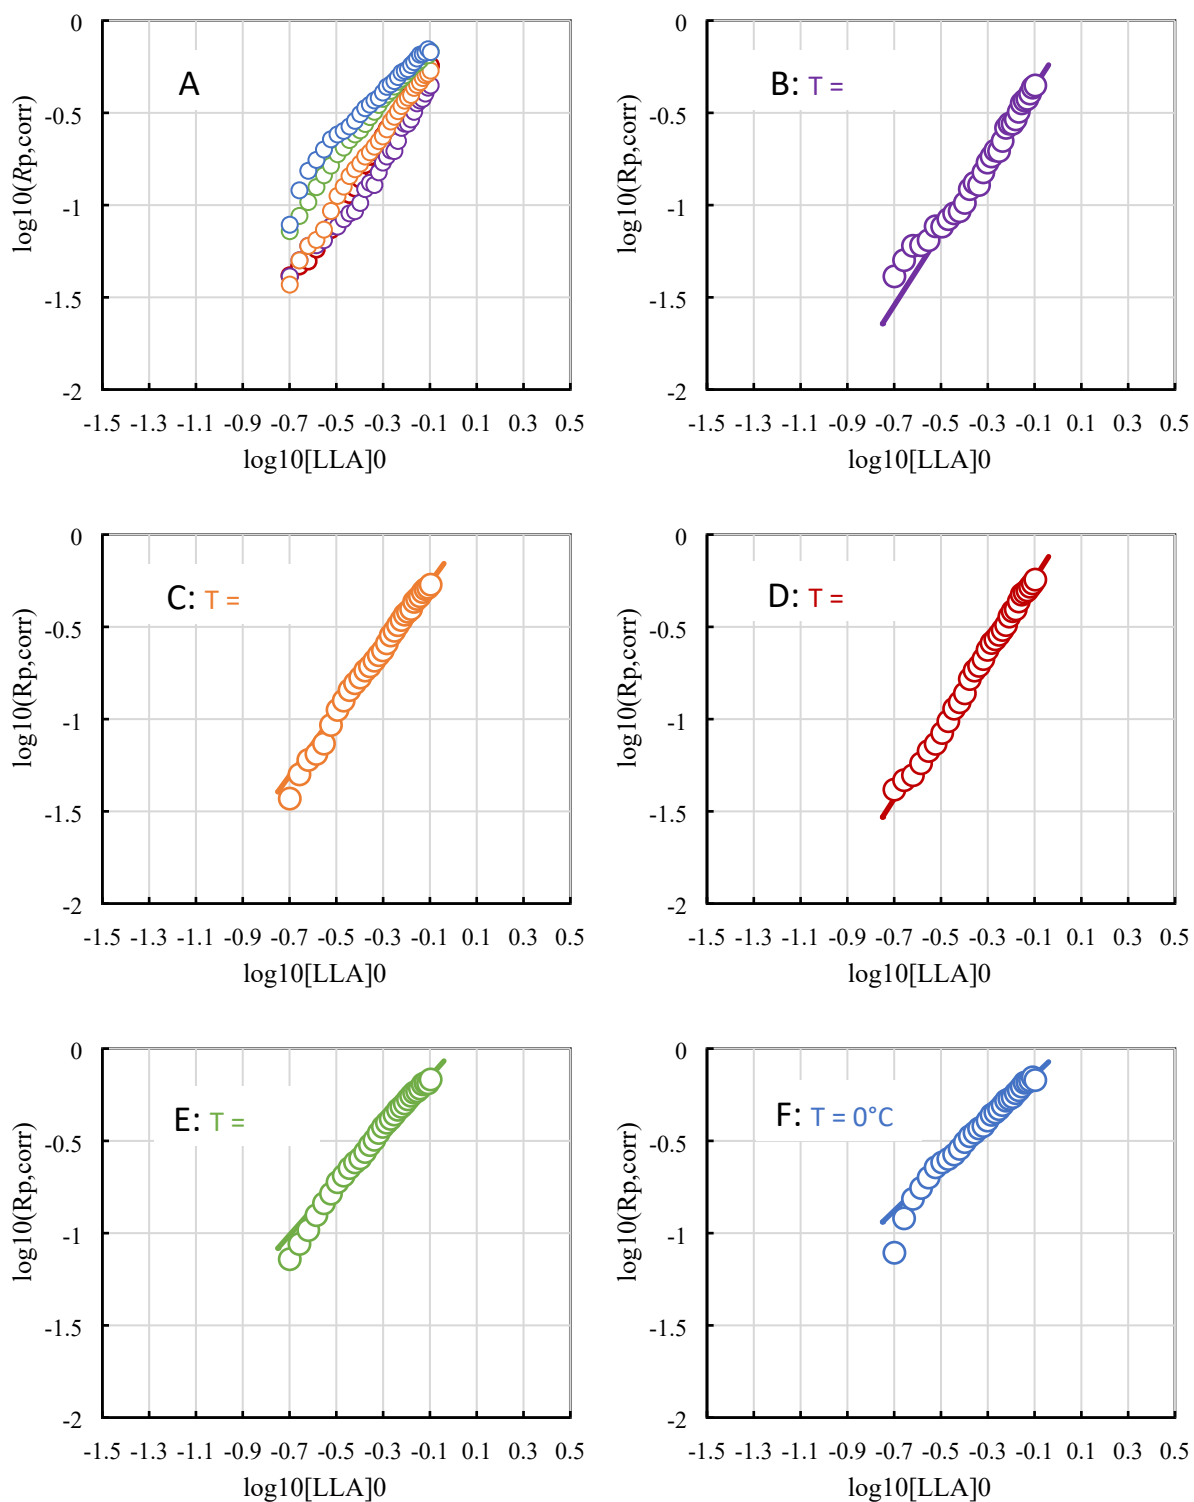

**Figure S5.** Log-log plots of depolymerization-corrected initial rate of lactide consumption vs initial lactide concentration for all monomer sweep experiments (A) and for individual temperatures showing overall reaction order (B-F). This is a depolymerization-corrected version of Figure S1, corrected using the equilibrium lactide concentrations shown in Table S18.

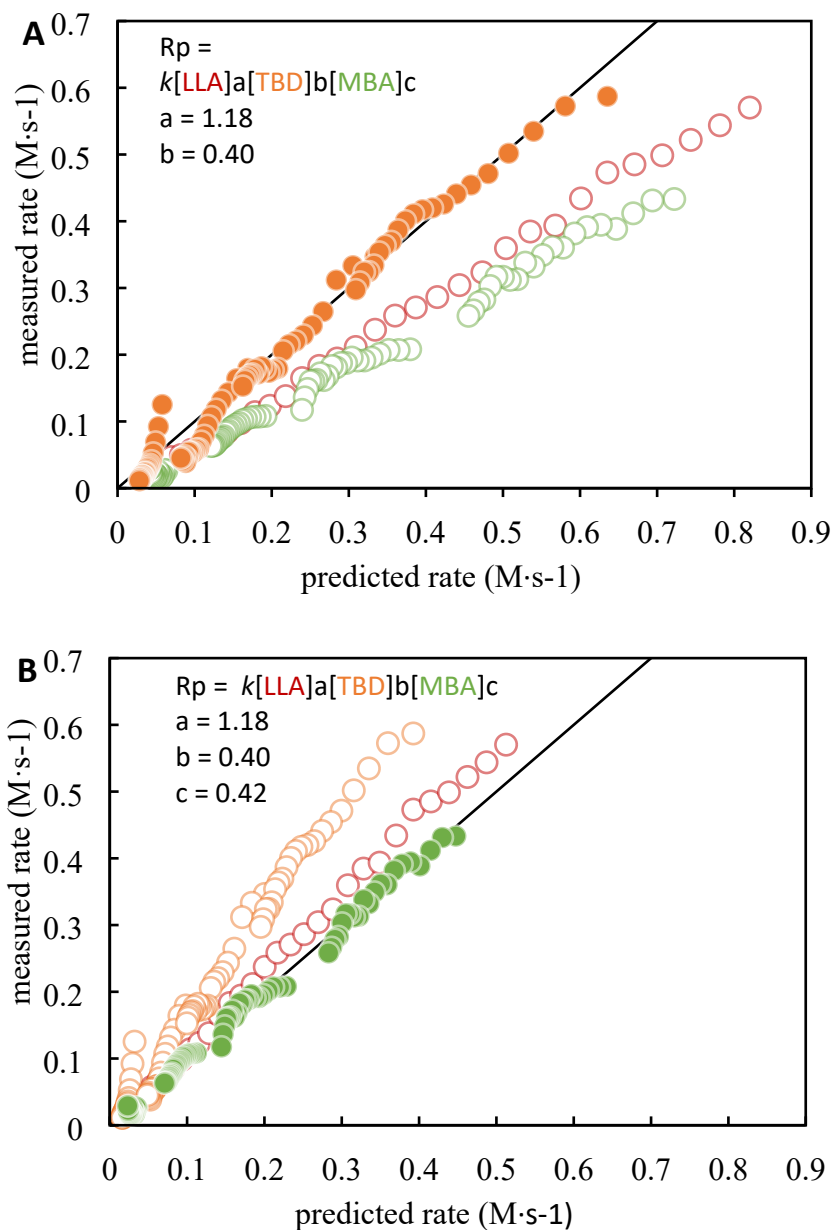

**Figure S6.** Comparison of predicted and measured depolymerization-corrected initial rates  $(-d[\text{LLA}]/dt)_0 \times [\text{LLA}]_0/([\text{LLA}]_0 - [\text{LLA}]_{\text{eq}})$  for monomer-to-catalyst sweep (A) and degree of polymerization sweep (B) experiments. In each graph, the model is fit to the filled points, while the open circles represent the predictions of the model applied to the remaining experiments. In each panel, the exponent not determined by the corresponding dataset is obtained from the complementary dataset. Red: monomer concentration sweep (Tables S3-S7); orange: catalyst-to-monomer sweep (Tables S8-S10); green: DP sweep (Tables S11-S15). This is a depolymerization-corrected version of Figure 3, corrected using the equilibrium lactide concentrations shown in Table S18.

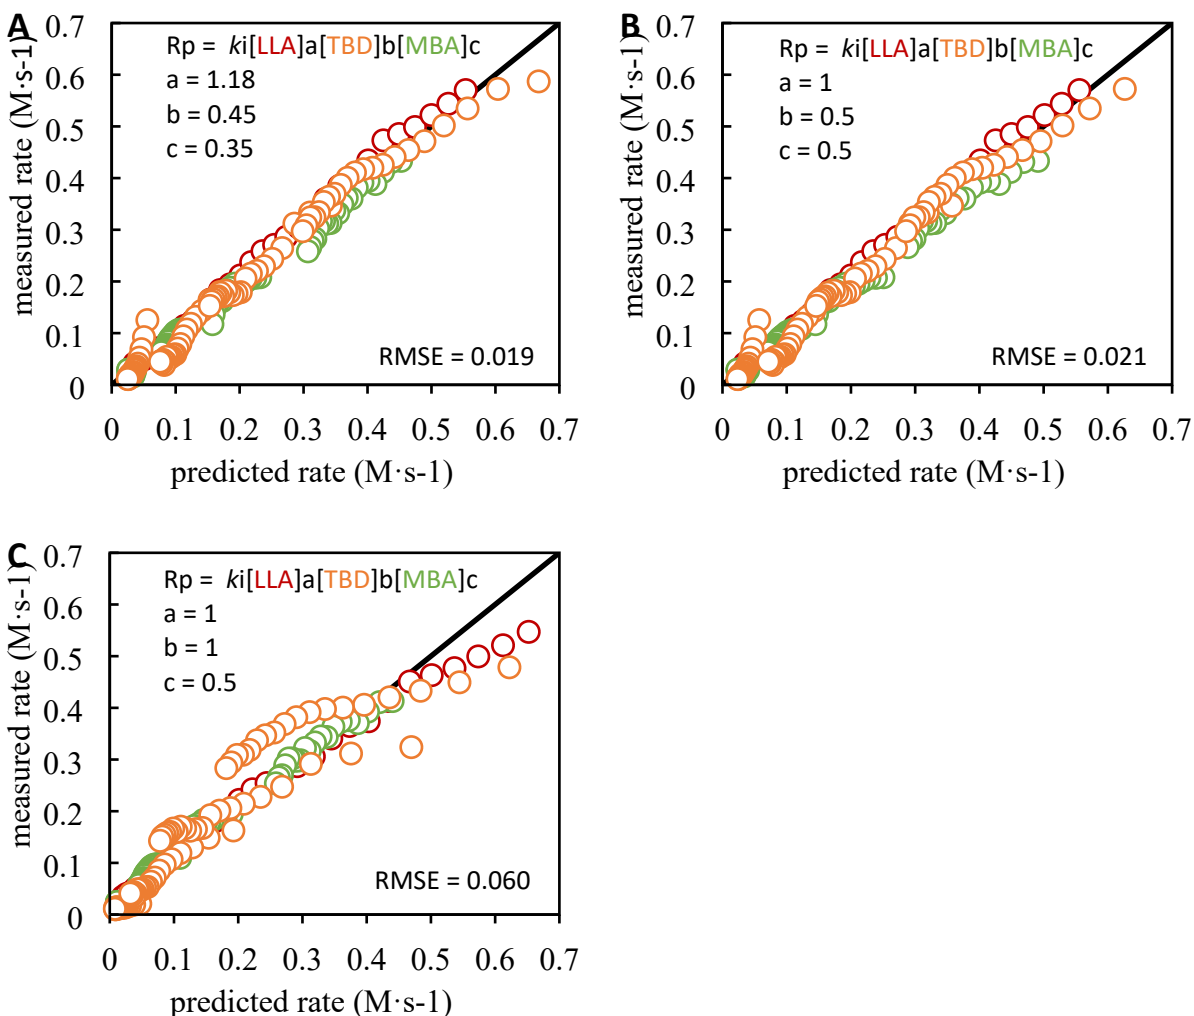

**Figure S7.** Comparison of predicted and measured depolymerization-corrected initial rates  $(-d[\text{LLA}]/dt)_0 \times [\text{LLA}]_0/([\text{LLA}]_0 - [\text{LLA}]_{\text{eq}})$  for all experiments, allowing  $k_i$  to vary depending on the experiment series ( $k_1$ : monomer-to-catalyst sweep;  $k_2$ : monomer concentration and DP sweep) (A) Empirical best fit from multiple weighted linear regression; (B) first-order in [LLA], half-order in [TBD] and [MBA]; (C) first-order in [LLA] and [TBD], half-order in [MBA]. Red: monomer concentration sweep (Tables S3-S7); orange: catalyst-to-monomer sweep (Tables S8-S10); green: DP sweep (Tables S11-S15). This is a depolymerization-corrected version of Figure 4, corrected using the equilibrium lactide concentrations shown in Table S18.
