# Supplementary material for: Comment on “Multidimensional kinetic study on the organocatalyzed ring-opening polymerization (ROP) of l-lactide via a robotic high-throughput flow platform” by B. Zhang and T. Junkers, Chem. Sci., 2026, 17, 4706
Source: Chem Sci. 2026 Jun 15;17(24):12142–6. doi: 10.1039/d6sc02040b (PMC13267183; doi:10.1039/d6sc02040b)
Supplement: SC-017-D6SC02040B-s001 [file SC-017-D6SC02040B-s001.xlsx]

## Sheet: Figure 1
t	1	5	10			t	1st order 0.2	1st order 0.4	1st order 0.6	1st order 0.8	spline 0.2	spline 0.4	spline 0.6	spline 0.8
[LLA]0	X1	X5	X10	kobs		0	0	0	0	0	0	0	0	0
0.2	12.47	20.36	25.4	0.0339645		0.1	0.339068	1.20638	2.81458	5.34859	1.56324	2.25478	3.97598	5.15734
0.4	19.88	56.21	63.5	0.121371		0.2	0.676987	2.3982	5.54994	10.4111	3.05159	4.44765	7.80467	10.1159					spline coefficients										M
0.6	33.49	76.9	89.59	0.285495		0.3	1.01376	3.57565	8.20831	15.2029	4.46678	6.5796	11.489	14.8797					a1	a2	a3		a4	a5	a6	a7			1	125	0	0	0	0	15	75
0.8	43.11	93.1	98.51	0.549694		0.4	1.34939	4.73889	10.7919	19.7383	5.81053	8.6516	15.0321	19.4527					0.288637	-3.83132	16.0127	0	-0.0332153	0.99646	-8.12622	40.2315			1	25	0	0	0	0	1	10
						0.5	1.68388	5.8881	13.3027	24.0312	7.08459	10.6646	18.4368	23.839					0.164237	-3.14492	22.8607	0	0.0454247	-1.36274	13.9498	14.8515			1	5	0	0	0	0	0	1
						0.6	2.01724	7.02345	15.7429	28.0944	8.29068	12.6197	21.7062	28.0426					0.497743	-7.51396	40.5062	0	0.00318733	-0.09562	3.41452	61.8195			1	1	0	0	1	0	0	0
						0.7	2.34947	8.1451	18.1143	31.9404	9.43053	14.5178	24.8432	32.0674					0.669657	-10.1404	52.5808	0	0.00637267	-0.19118	2.83448	82.9105			0	0	125	1000	0	30	-15	-75
						0.8	2.68057	9.25322	20.4191	35.5806	10.5059	16.3599	27.8509	35.9176															0	0	25	100	0	1	-1	-10
						0.9	3.01055	10.348	22.6589	39.0261	11.5185	18.147	30.7321	39.5971															0	0	5	10	0	0	0	-1
						1	3.33941	11.4295	24.8358	42.2874	12.47	19.88	33.49	43.11															0	0	1	1	0	0	0	0
						1.1	3.66716	12.498	26.9513	45.3742	13.3622	21.56	36.1274	46.4602
						1.2	3.99379	13.5536	29.0073	48.2959	14.1969	23.1879	38.6475	49.6519					(f1)1	(f1)5	(f2)5	(f2)10	(f1)0	(f2")10	(f1")5-(f2")5	(f1')5-(f2')5			M-1
						1.3	4.31932	14.5965	31.0055	51.0614	14.9757	24.7648	41.053	52.6889					12.47	20.36	20.36	25.4	0	0	0	0			0.0416667	-0.5	1.45833	0	-0.00833333	0.25	-2.29167	6.25
						1.4	4.64374	15.6268	32.9474	53.6789	15.7004	26.2916	43.3471	55.5754					19.88	56.21	56.21	63.5	0	0	0	0			-0.0123333	0.124	-0.111667	0	0.00406667	-0.122	1.11833	-3.05
						1.5	4.96707	16.6446	34.8346	56.1564	16.3727	27.7693	45.5328	58.3153					33.49	76.9	76.9	89.59	0	0	0	0			-0.004	0.024	-0.02	0	0.0024	-0.072	0.46	0.2
						1.6	5.28929	17.6502	36.6688	58.5014	16.9944	29.1988	47.613	60.9126					43.11	93.1	93.1	98.51	0	0	0	0			0.004	-0.024	0.02	0	-0.0024	0.072	-0.46	0.8
						1.7	5.61043	18.6437	38.4513	60.721	17.5671	30.5812	49.5906	63.3715															-0.0293333	0.376	-1.34667	1	0.00426667	-0.128	1.17333	-3.2
						1.8	5.93047	19.6251	40.1836	62.8219	18.0927	31.9175	51.4688	65.6958															-0.0333333	0.2	-0.166667	0	0.0866667	-1.6	8.83333	-15
	first-order model				spline fit	1.9	6.24943	20.5948	41.8672	64.8104	18.5728	33.2086	53.2504	67.8897															0.0666667	-0.4	0.333333	0	0.0266667	-0.8	7.33333	-20
						2	6.56731	21.5527	43.5034	66.6925	19.0092	34.4556	54.9385	69.9571															0.02	-0.12	0.1	0	-0.012	0.36	-3.3	9
						2.1	6.88411	22.4991	45.0935	68.474	19.4036	35.6593	56.5361	71.902
						2.2	7.19984	23.434	46.6389	70.1602	19.7577	36.8209	58.0461	73.7285
						2.3	7.51449	24.3577	48.1408	71.7562	20.0733	37.9412	59.4715	75.4406
						2.4	7.82808	25.2702	49.6004	73.2669	20.3522	39.0213	60.8153	77.0423
						2.5	8.14061	26.1717	51.019	74.6967	20.5959	40.0622	62.0805	78.5376
						2.6	8.45208	27.0624	52.3976	76.0501	20.8063	41.0647	63.2701	79.9305
						2.7	8.76249	27.9423	53.7374	77.3311	20.9852	42.03	64.3871	81.2252
						2.8	9.07184	28.8116	55.0395	78.5435	21.1341	42.9591	65.4344	82.4254
						2.9	9.38015	29.6704	56.3049	79.6912	21.2549	43.8528	66.4151	83.5354
						3	9.68742	30.5188	57.5348	80.7774	21.3494	44.7122	67.3321	84.5591
						3.1	9.99364	31.357	58.73	81.8055	21.4191	45.5382	68.1884	85.5005
						3.2	10.2988	32.1851	59.8916	82.7787	21.4659	46.3319	68.987	86.3637
						3.3	10.603	33.0032	61.0204	83.6998	21.4915	47.0942	69.7309	87.1526
						3.4	10.9061	33.8115	62.1175	84.5716	21.4976	47.8262	70.4231	87.8714
						3.5	11.2082	34.6099	63.1838	85.3968	21.486	48.5288	71.0665	88.5239
						3.6	11.5092	35.3988	64.22	86.1779	21.4584	49.2029	71.6642	89.1142
						3.7	11.8093	36.1781	65.2271	86.9172	21.4165	49.8497	72.2191	89.6464
						3.8	12.1083	36.9481	66.2058	87.6169	21.362	50.4699	72.7342	90.1244
						3.9	12.4063	37.7087	67.1569	88.2792	21.2967	51.0648	73.2126	90.5523
						4	12.7033	38.4602	68.0813	88.9061	21.2224	51.6352	73.6571	90.9341
						4.1	12.9993	39.2026	68.9797	89.4995	21.1406	52.1821	74.0708	91.2738
						4.2	13.2943	39.936	69.8528	90.0611	21.0533	52.7064	74.4567	91.5755
						4.3	13.5883	40.6606	70.7013	90.5927	20.9621	53.2093	74.8177	91.843
						4.4	13.8813	41.3765	71.5259	91.0959	20.8687	53.6917	75.1569	92.0806
						4.5	14.1733	42.0837	72.3274	91.5721	20.7749	54.1545	75.4771	92.2921
						4.6	14.4643	42.7824	73.1062	92.0229	20.6824	54.5988	75.7815	92.4816
						4.7	14.7543	43.4727	73.8632	92.4496	20.5929	55.0255	76.073	92.6531
						4.8	15.0434	44.1546	74.5988	92.8534	20.5082	55.4356	76.3546	92.8107
						4.9	15.3314	44.8283	75.3138	93.2356	20.43	55.8301	76.6293	92.9583
						5	15.6185	45.4939	76.0086	93.5974	20.36	56.21	76.9	93.1
						5.1	15.9046	46.1514	76.6838	93.9399	20.2997	56.5762	77.1693	93.2391
						5.2	16.1898	46.801	77.3401	94.264	20.2491	56.929	77.4376	93.3764
						5.3	16.4739	47.4428	77.9779	94.5708	20.2081	57.2687	77.705	93.5118
						5.4	16.7572	48.0769	78.5977	94.8612	20.1765	57.5956	77.9715	93.6454
						5.5	17.0394	48.7033	79.2001	95.1361	20.154	57.91	78.2371	93.7772
						5.6	17.3207	49.3221	79.7855	95.3962	20.1405	58.2121	78.5019	93.9073
						5.7	17.601	49.9335	80.3545	95.6424	20.1358	58.5022	78.7658	94.0358
						5.8	17.8804	50.5374	80.9074	95.8755	20.1396	58.7806	79.0289	94.1626
						5.9	18.1589	51.1342	81.4448	96.0961	20.1519	59.0475	79.2912	94.2878
						6	18.4364	51.7237	81.967	96.3049	20.1722	59.3033	79.5527	94.4114
						6.1	18.7129	52.3061	82.4746	96.5026	20.2006	59.5482	79.8135	94.5335
						6.2	18.9885	52.8814	82.9678	96.6896	20.2367	59.7824	80.0735	94.6541
						6.3	19.2632	53.4499	83.4472	96.8667	20.2804	60.0063	80.3328	94.7733
						6.4	19.537	54.0114	83.9131	97.0343	20.3315	60.2201	80.5914	94.891
						6.5	19.8098	54.5662	84.3659	97.1929	20.3898	60.4241	80.8492	95.0074
						6.6	20.0817	55.1143	84.8059	97.343	20.455	60.6185	81.1064	95.1224
						6.7	20.3527	55.6558	85.2336	97.4851	20.527	60.8037	81.363	95.2361
						6.8	20.6227	56.1908	85.6492	97.6196	20.6056	60.9799	81.6189	95.3486
						6.9	20.8919	56.7193	86.0531	97.747	20.6905	61.1474	81.8743	95.4598
						7	21.1601	57.2414	86.4457	97.8675	20.7817	61.3064	82.129	95.5699
						7.1	21.4274	57.7572	86.8272	97.9815	20.8788	61.4572	82.3831	95.6788
						7.2	21.6939	58.2668	87.1979	98.0895	20.9817	61.6002	82.6367	95.7866
						7.3	21.9594	58.7703	87.5582	98.1917	21.0901	61.7355	82.8898	95.8933
						7.4	22.224	59.2677	87.9084	98.2884	21.204	61.8634	83.1424	95.999
						7.5	22.4877	59.7591	88.2488	98.3799	21.323	61.9843	83.3944	96.1037
						7.6	22.7505	60.2445	88.5795	98.4666	21.447	62.0983	83.646	96.2075
						7.7	23.0124	60.7241	88.9009	98.5486	21.5758	62.2058	83.8971	96.3103
						7.8	23.2735	61.198	89.2133	98.6262	21.7092	62.3071	84.1478	96.4122
						7.9	23.5336	61.6661	89.5169	98.6997	21.847	62.4023	84.398	96.5133
						8	23.7929	62.1285	89.812	98.7693	21.989	62.4918	84.6479	96.6137
						8.1	24.0513	62.5854	90.0987	98.8351	22.1349	62.5759	84.8973	96.7132
						8.2	24.3088	63.0367	90.3774	98.8974	22.2846	62.6548	85.1464	96.812
						8.3	24.5655	63.4827	90.6482	98.9564	22.4379	62.7288	85.3952	96.9101
						8.4	24.8212	63.9232	90.9115	99.0122	22.5946	62.7981	85.6436	97.0076
						8.5	25.0761	64.3584	91.1673	99.065	22.7545	62.8631	85.8918	97.1045
						8.6	25.3302	64.7884	91.4159	99.115	22.9174	62.924	86.1396	97.2008
						8.7	25.5834	65.2132	91.6575	99.1624	23.0831	62.9811	86.3872	97.2965
						8.8	25.8357	65.6328	91.8923	99.2072	23.2513	63.0346	86.6345	97.3918
						8.9	26.0872	66.0474	92.1205	99.2496	23.422	63.0849	86.8816	97.4866
						9	26.3378	66.457	92.3423	99.2897	23.5948	63.1322	87.1285	97.5809
						9.1	26.5875	66.8617	92.5578	99.3277	23.7697	63.1767	87.3752	97.6749
						9.2	26.8365	67.2615	92.7673	99.3637	23.9463	63.2188	87.6217	97.7686
						9.3	27.0845	67.6564	92.9708	99.3977	24.1245	63.2588	87.8681	97.8619
						9.4	27.3318	68.0466	93.1687	99.4299	24.3041	63.2968	88.1143	97.955
						9.5	27.5782	68.4321	93.3609	99.4604	24.485	63.3331	88.3604	98.0479
						9.6	27.8237	68.8129	93.5478	99.4893	24.6668	63.3681	88.6065	98.1405
						9.7	28.0685	69.1891	93.7294	99.5166	24.8494	63.4021	88.8524	98.233
						9.8	28.3123	69.5608	93.9059	99.5424	25.0326	63.4352	89.0983	98.3254
						9.9	28.5554	69.928	94.0774	99.5669	25.2162	63.4677	89.3442	98.4177
						10	28.7977	70.2908	94.2441	99.5901	25.4	63.5	89.59	98.51

## Sheet: Figure 2_S1
[LLA]0	log[LLA]0	log(dLLA/dt)_35	log(dLLA/dt)_30	log(dLLA/dt)_20	log(dLLA/dt)_10	log(dLLA/dt)_0	w35	w30	w20	w10	w0	r35	r30	r20	r10	r0						35°C			XTWX			XTWY
0.2	-0.69897	-1.49451	-1.5278	-1.45949	-1.20223	-1.15381	0.00102562	0.000879834	0.00120508	0.00394032	0.00492468	0.00856901	-0.0128243	0.0018861	-0.0260113	-0.0521345						intercept	-0.172474		1.46377	-0.255647		-0.785455
0.22	-0.657577	-1.39577	-1.38691	-1.4008	-1.11376	-0.962828	0.00161606	0.00168336	0.00157908	0.00592205	0.0118671	0.0115875	-0.00949581	-0.000172971	-0.0252533	-0.0290248						slope	2.08488		-0.255647	0.0552962		0.159378
0.24	-0.619789	-1.30875	-1.30048	-1.36755	-1.03363	-0.853275	0.00241263	0.00250635	0.00184038	0.00856523	0.0196539	0.0148147	-0.00912052	-0.00480314	-0.0236807	-0.0137982						RMSE	0.00923929		(XTWX)-1
0.26	-0.585027	-1.2982	-1.26133	-1.29747	-0.948777	-0.791226	0.00253284	0.00300149	0.00254137	0.0126604	0.0261545	0.00979349	-0.0136688	-0.00579552	-0.0183016	-0.008653						log[M]	fit		3.54783	16.4024
0.28	-0.552842	-1.26472	-1.19992	-1.22623	-0.880957	-0.732068	0.00295497	0.00398256	0.00352813	0.0173016	0.0343451	0.00705333	-0.0152203	-0.00602984	-0.0144211	-0.00177379						-0.75	-1.73613		16.4024	93.9163
0.3	-0.522879	-1.18394	-1.09415	-1.18404	-0.825627	-0.674299	0.00428669	0.00648193	0.0042847	0.0223227	0.0448129	0.0108481	-0.00828509	-0.00990876	-0.0122112	0.00755325						-0.04	-0.255869
0.32	-0.49485	-1.18087	-1.00816	-1.12186	-0.761149	-0.646141	0.00434775	0.00963104	0.00570535	0.0300402	0.0510173	0.00344537	-0.00171228	-0.0104918	-0.00446727	0.00439173						30°C			XTWX			XTWY
0.34	-0.468521	-1.13647	-0.954094	-1.05481	-0.723137	-0.62513	0.00533401	0.0123541	0.00776919	0.035787	0.0562006	0.00212264	-0.00033589	-0.00926476	-0.00527289	-0.00204078						intercept	-0.10099		2.54174	-0.468423		-1.10831
0.36	-0.443697	-1.10152	-0.893867	-0.984586	-0.68007	-0.599654	0.00626544	0.0163029	0.0107356	0.0436376	0.0631963	-0.000731703	0.00398961	-0.00590212	-0.00268511	-0.00562292						slope	1.81805		-0.468423	0.10586		0.239765
0.38	-0.420216	-1.08665	-0.853967	-0.947421	-0.647854	-0.567591	0.00670967	0.0195914	0.0127396	0.0506164	0.0732518	-0.00750588	0.00349974	-0.00947965	-0.00419474	-0.00452937						RMSE	0.00870182		(XTWX)-1
0.4	-0.39794	-1.03885	-0.820679	-0.897222	-0.624038	-0.529604	0.00836177	0.0228372	0.016053	0.0564838	0.0872553	-0.00806814	0.00131151	-0.00921299	-0.00955484	0.00178814						log[M]	fit		2.1322	9.43487
0.42	-0.376751	-0.961392	-0.780263	-0.81764	-0.588283	-0.496813	0.0119458	0.0275089	0.023159	0.0665937	0.101478	-0.000869121	0.00215417	0.00197276	-0.00763901	0.00628861						-0.75	-1.46453		9.43487	51.1951
0.44	-0.356547	-0.925378	-0.755198	-0.770418	-0.549347	-0.476601	0.0141008	0.0308748	0.0287848	0.0796719	0.111378	-0.00263924	-0.00243923	0.00442511	-0.00233785	0.00256296						-0.04	-0.173712
0.46	-0.337242	-0.934706	-0.722808	-0.743423	-0.519671	-0.45271	0.0135079	0.0358414	0.0325952	0.0913392	0.124331	-0.0169501	-0.00382857	-0.000456343	-0.00169449	0.00230683						20°C			XTWX			XTWY
0.48	-0.318759	-0.864309	-0.691302	-0.705061	-0.48138	-0.438541	0.0186803	0.0414377	0.0388936	0.108953	0.132715	-0.00885458	-0.00512235	-0.000281502	0.00643907	-0.00534877						intercept	-0.0510881		2.63875	-0.465159		-1.08824
0.5	-0.30103	-0.809558	-0.663875	-0.653778	-0.447494	-0.408261	0.0240372	0.0470165	0.0492542	0.127354	0.152573	-0.00341919	-0.00792904	0.00720093	0.0131052	0.00139348						slope	2.04968		-0.465159	0.0993949		0.227492
0.52	-0.283997	-0.774963	-0.624132	-0.615442	-0.423908	-0.376502	0.0281886	0.0564595	0.0587646	0.141966	0.176602	-0.00406565	-0.00376195	0.00970702	0.0125139	0.0112577						RMSE	0.00869061		(XTWX)-1
0.54	-0.267606	-0.740841	-0.580283	-0.594403	-0.402359	-0.362551	0.0329852	0.0690931	0.0647431	0.156777	0.188321	-0.00441916	0.00433869	0.0030238	0.0107929	0.00500468						log[M]	fit		2.16523	10.1331
0.56	-0.251812	-0.742699	-0.553447	-0.569105	-0.378086	-0.344296	0.0327041	0.0781818	0.0727427	0.175318	0.204837	-0.0198488	0.00342273	-0.00117211	0.012292	0.00346709						-0.75	-1.58835		10.1331	57.4829
0.58	-0.236572	-0.686546	-0.52197	-0.541828	-0.351637	-0.321571	0.0423554	0.0903775	0.0824792	0.198028	0.227435	-0.0101207	0.00624685	-0.00388983	0.0169583	0.00742191						-0.04	-0.133075
0.6	-0.221849	-0.614327	-0.492793	-0.514464	-0.334851	-0.297122	0.0590671	0.103375	0.0935561	0.213943	0.25454	0.0112985	0.00842271	-0.00615816	0.0125097	0.0144958						10°C			XTWX			XTWY
0.62	-0.207608	-0.590511	-0.462976	-0.467623	-0.315721	-0.287198	0.0659141	0.11859	0.116079	0.233646	0.266443	0.00860215	0.0120402	0.00698416	0.0110004	0.0054328						intercept	-0.0189932		5.00305	-0.995613		-1.56597
0.64	-0.19382	-0.58986	-0.446036	-0.437696	-0.293003	-0.276921	0.0661118	0.128212	0.133232	0.259414	0.279357	-0.00799332	0.00599118	0.00885094	0.0142739	-0.00310849						slope	1.47742		-0.995613	0.246413		0.382967
0.66	-0.180456	-0.565445	-0.430307	-0.427046	-0.272944	-0.255038	0.0739794	0.137843	0.139929	0.28452	0.308975	-0.01069	-0.00106096	-0.00527446	0.0153245	0.00313015						RMSE	0.015453		(XTWX)-1
0.68	-0.167491	-0.523461	-0.390905	-0.38369	-0.255344	-0.238717	0.0897591	0.165268	0.170852	0.308541	0.333093	-0.00123634	0.0134318	0.0100606	0.0140232	0.00317393						log[M]	fit		1.02005	4.12144
0.7	-0.154902	-0.47665	-0.373947	-0.345855	-0.247099	-0.218551	0.111353	0.178693	0.203372	0.32048	0.36551	0.0141192	0.00834823	0.0229983	0.00097649	0.00919715						-0.75	-1.12706		4.12144	20.7106
0.72	-0.142668	-0.460204	-0.35852	-0.334162	-0.231935	-0.197421	0.120114	0.191849	0.214623	0.343662	0.402864	0.00766614	0.00185771	0.0098663	-0.00292397	0.0177691						-0.04	-0.0780902
0.74	-0.130768	-0.450646	-0.335166	-0.321643	-0.208887	-0.193696	0.125519	0.213632	0.22736	0.382142	0.409833	-0.00454489	0.00378018	-0.00277672	0.00468798	0.00150665						0°C			XTWX			XTWY
0.76	-0.119186	-0.421284	-0.318934	-0.301451	-0.200848	-0.184535	0.143691	0.230215	0.249516	0.396556	0.427494	-0.000280709	-0.00139087	-0.00702901	-0.00841556	-0.00672921						intercept	-0.0295186		5.83633	-1.22834		-1.72405
0.78	-0.107905	-0.388681	-0.310505	-0.283084	-0.20253	-0.167184	0.16697	0.239326	0.271539	0.393495	0.463055	0.00816208	-0.0152578	-0.0131512	-0.0358166	-0.00211368						slope	1.26331		-1.22834	0.327692		0.450236
0.8	-0.09691	-0.376083	-0.293605	-0.261951	-0.181572	-0.181847	0.176943	0.258697	0.299293	0.433367	0.432819	-0.00151706	-0.0196077	-0.0156235	-0.0300756	-0.0468905						RMSE	0.0157412		(XTWX)-1
																						log[M]	fit		0.811699	3.04261
																						-0.75	-0.977003		3.04261	14.4567
																						-0.04	-0.0800511

## Sheet: Figure 3A
[LLA]0	[I]0	[cat]0	-d[LLA]/dt	y^	res	I	ln[LLA]	ln[cat]	ln[I]	ln(-d[LLA]/dt)	W	y^	res	wres			Parameters		errors			Statistics				parity line
0.2	0.002	0.001	0.0347143	0.0429558	-0.00824147											ln k	2.34308	+/-	0.0917644		N	84				0	0
0.22	0.0022	0.0011	0.0397377	0.0525438	-0.0128061											a+c	1.71973	+/-	0.0448019		SSWR	0.0213665				0.7	0.7
0.24	0.0024	0.0012	0.0428996	0.0631543	-0.0202547											b	0.394175	+/-	0.0140743		se	0.0162414
0.26	0.0026	0.0013	0.050412	0.0747975	-0.0243855											c	0.417482		fixed		RMSE	0.0190769
0.28	0.0028	0.0014	0.059398	0.0874828	-0.0280847
0.3	0.003	0.0015	0.0654577	0.101219	-0.0357613											k	10.4133	×/÷	1.09611
0.32	0.0032	0.0016	0.0755338	0.116014	-0.0404807
0.34	0.0034	0.0017	0.088143	0.131877	-0.0437339
0.36	0.0036	0.0018	0.103613	0.148814	-0.045201
0.38	0.0038	0.0019	0.11287	0.166832	-0.0539624
0.4	0.004	0.002	0.1267	0.185939	-0.0592387
0.42	0.0042	0.0021	0.152181	0.20614	-0.0539594											XTWX				XTWY
0.44	0.0044	0.0022	0.169661	0.227442	-0.0577813											4.4239	-1.97577	-29.4295		-4.63263
0.46	0.0046	0.0023	0.180541	0.249851	-0.069309											-1.97577	1.02019	13.2379		2.34311
0.48	0.0048	0.0024	0.197215	0.273371	-0.0761564											-29.4295	13.2379	197.173		31.5306
0.5	0.005	0.0025	0.221933	0.298009	-0.0760761
0.52	0.0052	0.0026	0.242414	0.32377	-0.0813556											(XTWX)-1
0.54	0.0054	0.0027	0.254447	0.350658	-0.0962116											31.9227	-0.0198955	4.76604
0.56	0.0056	0.0028	0.269709	0.378679	-0.108971											-0.0198955	7.60929	-0.513846
0.58	0.0058	0.0029	0.287192	0.407838	-0.120646											4.76604	-0.513846	0.750937
0.6	0.006	0.003	0.305869	0.438138	-0.132269
0.62	0.0062	0.0031	0.340703	0.469585	-0.128881
0.64	0.0064	0.0032	0.365009	0.502182	-0.137173
0.66	0.0066	0.0033	0.374071	0.535934	-0.161863
0.68	0.0068	0.0034	0.413343	0.570845	-0.157502
0.7	0.007	0.0035	0.450967	0.606919	-0.155951
0.72	0.0072	0.0036	0.463274	0.644159	-0.180884
0.74	0.0074	0.0037	0.476823	0.682569	-0.205746
0.76	0.0076	0.0038	0.499516	0.722154	-0.222638
0.78	0.0078	0.0039	0.521094	0.762916	-0.241822
0.8	0.008	0.004	0.547077	0.804859	-0.257782
0.2	0.002	0.001	0.0209744	0.0429558	-0.0219814	1	-1.60944	-6.21461	-6.90776	-3.86445	0.000439924	-3.14758	-0.71687	-0.0150359
0.2	0.002	0.0008	0.0193015	0.0393389	-0.0200373	1	-1.60944	-6.21461	-7.1309	-3.94757	0.000372549	-3.23554	-0.712029	-0.0137432
0.2	0.002	0.000666667	0.017318	0.0366109	-0.019293	1	-1.60944	-6.21461	-7.31322	-4.05601	0.000299912	-3.30741	-0.748602	-0.0129643
0.2	0.002	0.000571429	0.015404	0.0344526	-0.0190486	1	-1.60944	-6.21461	-7.46737	-4.17313	0.000237284	-3.36817	-0.804955	-0.0123995
0.2	0.002	0.0005	0.0136949	0.0326861	-0.0189911	1	-1.60944	-6.21461	-7.6009	-4.29073	0.000187551	-3.42081	-0.869923	-0.0119135
0.2	0.002	0.000444444	0.0133879	0.0312032	-0.0178153	1	-1.60944	-6.21461	-7.71869	-4.3134	0.000179237	-3.46723	-0.846168	-0.0113284
0.2	0.002	0.0004	0.0134653	0.0299339	-0.0164686	1	-1.60944	-6.21461	-7.82405	-4.30764	0.000181315	-3.50876	-0.798873	-0.0107571
0.2	0.002	0.000363636	0.0134021	0.0288302	-0.0154281	1	-1.60944	-6.21461	-7.91936	-4.31234	0.000179616	-3.54633	-0.766011	-0.0102662
0.2	0.002	0.000333333	0.0124348	0.0278581	-0.0154233	1	-1.60944	-6.21461	-8.00637	-4.38725	0.000154625	-3.58063	-0.806623	-0.0100302
0.2	0.002	0.000307692	0.0126651	0.0269929	-0.0143278	1	-1.60944	-6.21461	-8.08641	-4.36891	0.000160405	-3.61218	-0.756724	-0.00958398
0.2	0.002	0.000285714	0.01331	0.0262158	-0.0129058	1	-1.60944	-6.21461	-8.16052	-4.31924	0.000177155	-3.64139	-0.677849	-0.00902215
0.2	0.002	0.000266667	0.0113329	0.0255125	-0.0141795	1	-1.60944	-6.21461	-8.22951	-4.48004	0.000128435	-3.66859	-0.811454	-0.00919616
0.2	0.002	0.00025	0.0124328	0.0248716	-0.0124388	1	-1.60944	-6.21461	-8.29405	-4.38742	0.000154575	-3.69403	-0.69339	-0.00862077
0.2	0.002	0.000235294	0.0136895	0.0242843	-0.0105948	1	-1.60944	-6.21461	-8.35467	-4.29112	0.000187403	-3.71792	-0.573199	-0.00784683
0.2	0.002	0.000222222	0.0140942	0.0237433	-0.0096491	1	-1.60944	-6.21461	-8.41183	-4.26199	0.000198646	-3.74045	-0.521537	-0.00735065
0.2	0.002	0.000210526	0.0128937	0.0232426	-0.0103489	1	-1.60944	-6.21461	-8.4659	-4.35101	0.000166248	-3.76177	-0.589247	-0.0075976
0.2	0.002	0.0002	0.0123892	0.0227774	-0.0103882	1	-1.60944	-6.21461	-8.51719	-4.39093	0.000153493	-3.78199	-0.608942	-0.00754433
0.2	0.002	0.000190476	0.0104541	0.0223436	-0.0118895	1	-1.60944	-6.21461	-8.56598	-4.56076	0.000109288	-3.80122	-0.759544	-0.00794035
0.2	0.002	0.000181818	0.0102134	0.0219376	-0.0117242	1	-1.60944	-6.21461	-8.6125	-4.58405	0.000104314	-3.81955	-0.764501	-0.00780815
0.2	0.002	0.000173913	0.0133115	0.0215565	-0.00824501	1	-1.60944	-6.21461	-8.65696	-4.31912	0.000177197	-3.83708	-0.482048	-0.0064168
0.2	0.002	0.000166667	0.0112618	0.0211979	-0.00993613	1	-1.60944	-6.21461	-8.69951	-4.48634	0.000126828	-3.85385	-0.632487	-0.00712294
0.35	0.0035	0.00175	0.162778	0.140211	0.0225674	1	-1.04982	-5.65499	-6.34814	-1.81537	0.0264967	-1.96461	0.149242	0.0242933
0.35	0.0035	0.0014	0.148717	0.128405	0.0203121	1	-1.04982	-5.65499	-6.57128	-1.90571	0.0221168	-2.05257	0.146857	0.0218401
0.35	0.0035	0.00116667	0.129804	0.119501	0.0103031	1	-1.04982	-5.65499	-6.7536	-2.04173	0.016849	-2.12443	0.0827017	0.010735
0.35	0.0035	0.001	0.119214	0.112456	0.00675813	1	-1.04982	-5.65499	-6.90776	-2.12684	0.0142119	-2.1852	0.0583594	0.00695725
0.35	0.0035	0.000875	0.107045	0.10669	0.00035534	1	-1.04982	-5.65499	-7.04129	-2.23451	0.0114586	-2.23783	0.00332506	0.000355932
0.35	0.0035	0.000777778	0.0970024	0.10185	-0.00484725	1	-1.04982	-5.65499	-7.15907	-2.33302	0.00940946	-2.28426	-0.048762	-0.00473003
0.35	0.0035	0.0007	0.0850684	0.0977064	-0.012638	1	-1.04982	-5.65499	-7.26443	-2.4643	0.00723663	-2.32579	-0.138512	-0.011783
0.35	0.0035	0.000636364	0.0715515	0.0941038	-0.0225523	1	-1.04982	-5.65499	-7.35974	-2.63734	0.00511962	-2.36336	-0.273981	-0.0196037
0.35	0.0035	0.000583333	0.0636025	0.0909309	-0.0273285	1	-1.04982	-5.65499	-7.44675	-2.7551	0.00404527	-2.39765	-0.357448	-0.0227346
0.35	0.0035	0.000538462	0.0535372	0.0881068	-0.0345696	1	-1.04982	-5.65499	-7.52679	-2.92738	0.00286623	-2.42921	-0.498172	-0.0266708
0.35	0.0035	0.0005	0.0528634	0.0855703	-0.0327069	1	-1.04982	-5.65499	-7.6009	-2.94004	0.00279453	-2.45842	-0.481627	-0.0254604
0.35	0.0035	0.000466667	0.0492	0.0832745	-0.0340745	1	-1.04982	-5.65499	-7.6699	-3.01186	0.00242064	-2.48561	-0.526248	-0.0258914
0.35	0.0035	0.0004375	0.0473744	0.0811828	-0.0338084	1	-1.04982	-5.65499	-7.73443	-3.04967	0.00224434	-2.51105	-0.538621	-0.0255168
0.35	0.0035	0.000411765	0.0486925	0.0792658	-0.0305732	1	-1.04982	-5.65499	-7.79506	-3.02223	0.00237096	-2.53495	-0.487281	-0.0237269
0.35	0.0035	0.000388889	0.0489504	0.0774998	-0.0285495	1	-1.04982	-5.65499	-7.85222	-3.01695	0.00239614	-2.55748	-0.459469	-0.0224912
0.35	0.0035	0.000368421	0.0404191	0.0758656	-0.0354465	1	-1.04982	-5.65499	-7.90628	-3.20845	0.0016337	-2.57879	-0.629661	-0.0254503
0.35	0.0035	0.00035	0.0348781	0.0743472	-0.039469	1	-1.04982	-5.65499	-7.95758	-3.35589	0.00121648	-2.59901	-0.756885	-0.0263987
0.35	0.0035	0.000333333	0.0438765	0.072931	-0.0290545	1	-1.04982	-5.65499	-8.00637	-3.12638	0.00192514	-2.61824	-0.508135	-0.0222952
0.35	0.0035	0.000318182	0.0376396	0.0716058	-0.0339662	1	-1.04982	-5.65499	-8.05289	-3.2797	0.00141674	-2.63658	-0.64312	-0.0242068
0.35	0.0035	0.000304348	0.0417063	0.0703621	-0.0286557	1	-1.04982	-5.65499	-8.09734	-3.1771	0.00173942	-2.6541	-0.523001	-0.0218125
0.35	0.0035	0.000291667	0.0407967	0.0691915	-0.0283948	1	-1.04982	-5.65499	-8.1399	-3.19915	0.00166437	-2.67088	-0.528278	-0.021552
0.5	0.005	0.0025	0.324023	0.298009	0.0260135	1	-0.693147	-5.29832	-5.99146	-1.12694	0.104991	-1.21063	0.0836892	0.0271172
0.5	0.005	0.002	0.311626	0.272917	0.0387091	1	-0.693147	-5.29832	-6.21461	-1.16595	0.0971106	-1.29859	0.132637	0.041333
0.5	0.005	0.00166667	0.291538	0.253991	0.037547	1	-0.693147	-5.29832	-6.39693	-1.23258	0.0849945	-1.37046	0.137872	0.0401948
0.5	0.005	0.00142857	0.247332	0.239018	0.00831421	1	-0.693147	-5.29832	-6.55108	-1.39702	0.061173	-1.43122	0.0341936	0.00845716
0.5	0.005	0.00125	0.227744	0.226762	0.000981907	1	-0.693147	-5.29832	-6.68461	-1.47953	0.0518674	-1.48385	0.00432077	0.00098403
0.5	0.005	0.00111111	0.214447	0.216475	-0.0020284	1	-0.693147	-5.29832	-6.80239	-1.53969	0.0459873	-1.53028	-0.0094143	-0.00201886
0.5	0.005	0.001	0.206055	0.207669	-0.00161396	1	-0.693147	-5.29832	-6.90776	-1.57961	0.0424586	-1.57181	-0.00780213	-0.00160767
0.5	0.005	0.000909091	0.201053	0.200012	0.00104095	1	-0.693147	-5.29832	-7.00307	-1.60419	0.0404221	-1.60938	0.00519097	0.00104366
0.5	0.005	0.000833333	0.192289	0.193268	-0.000978906	1	-0.693147	-5.29832	-7.09008	-1.64876	0.0369751	-1.64368	-0.00507789	-0.000976422
0.5	0.005	0.000769231	0.167579	0.187265	-0.0196868	1	-0.693147	-5.29832	-7.17012	-1.7863	0.0280826	-1.67523	-0.111075	-0.0186137
0.5	0.005	0.000714286	0.165319	0.181874	-0.0165555	1	-0.693147	-5.29832	-7.24423	-1.79988	0.0273303	-1.70444	-0.0954399	-0.015778
0.5	0.005	0.000666667	0.162287	0.176995	-0.0147082	1	-0.693147	-5.29832	-7.31322	-1.81839	0.0263369	-1.73164	-0.0867568	-0.0140795
0.5	0.005	0.000625	0.167115	0.172549	-0.00543388	1	-0.693147	-5.29832	-7.37776	-1.78907	0.0279274	-1.75707	-0.0319984	-0.00534741
0.5	0.005	0.000588235	0.170113	0.168474	0.00163885	1	-0.693147	-5.29832	-7.43838	-1.77129	0.0289385	-1.78097	0.00968056	0.00164679
0.5	0.005	0.000555556	0.160167	0.164721	-0.00455454	1	-0.693147	-5.29832	-7.49554	-1.83154	0.0256533	-1.8035	-0.0280395	-0.00449099
0.5	0.005	0.000526316	0.166465	0.161248	0.00521743	1	-0.693147	-5.29832	-7.54961	-1.79297	0.0277106	-1.82481	0.0318442	0.00530094
0.5	0.005	0.0005	0.159919	0.15802	0.00189847	1	-0.693147	-5.29832	-7.6009	-1.83309	0.025574	-1.84503	0.0119425	0.00190983
0.5	0.005	0.00047619	0.158211	0.15501	0.00320079	1	-0.693147	-5.29832	-7.64969	-1.84383	0.0250307	-1.86426	0.0204386	0.00323361
0.5	0.005	0.000454545	0.154554	0.152194	0.00236065	1	-0.693147	-5.29832	-7.69621	-1.86721	0.023887	-1.8826	0.0153918	0.00237887
0.5	0.005	0.000434783	0.150757	0.14955	0.00120663	1	-0.693147	-5.29832	-7.74066	-1.89209	0.0227276	-1.90012	0.00803603	0.00121149
0.5	0.005	0.000416667	0.142757	0.147062	-0.00430578	1	-0.693147	-5.29832	-7.78322	-1.94661	0.0203794	-1.9169	-0.0297158	-0.00424212
0.7	0.007	0.0035	0.559762	0.606919	-0.047157	1	-0.356675	-4.96185	-5.65499	-0.580244	0.313333	-0.499361	-0.0808837	-0.0452756
0.7	0.007	0.0028	0.545885	0.555816	-0.00993113	1	-0.356675	-4.96185	-5.87814	-0.605348	0.29799	-0.587318	-0.0180292	-0.00984188
0.7	0.007	0.00233333	0.509825	0.517273	-0.00744752	1	-0.356675	-4.96185	-6.06046	-0.673687	0.259922	-0.659185	-0.0145023	-0.00739365
0.7	0.007	0.002	0.478473	0.486778	-0.00830494	1	-0.356675	-4.96185	-6.21461	-0.737156	0.228936	-0.719948	-0.0172083	-0.00823368
0.7	0.007	0.00175	0.449424	0.461819	-0.0123953	1	-0.356675	-4.96185	-6.34814	-0.799789	0.201982	-0.772582	-0.0272069	-0.0122274
0.7	0.007	0.00155556	0.433138	0.440868	-0.00772982	1	-0.356675	-4.96185	-6.46592	-0.836698	0.187609	-0.819009	-0.0176887	-0.00766166
0.7	0.007	0.0014	0.420349	0.422934	-0.00258468	1	-0.356675	-4.96185	-6.57128	-0.86667	0.176693	-0.86054	-0.00613006	-0.00257676
0.7	0.007	0.00127273	0.405909	0.407339	-0.00143058	1	-0.356675	-4.96185	-6.66659	-0.901627	0.164762	-0.898109	-0.0035182	-0.00142807
0.7	0.007	0.00116667	0.400416	0.393605	0.00681059	1	-0.356675	-4.96185	-6.7536	-0.915252	0.160333	-0.932407	0.0171551	0.00686917
0.7	0.007	0.00107692	0.397765	0.381381	0.0163841	1	-0.356675	-4.96185	-6.83365	-0.921895	0.158217	-0.963958	0.0420627	0.0167311
0.7	0.007	0.001	0.391737	0.370401	0.0213362	1	-0.356675	-4.96185	-6.90776	-0.937164	0.153458	-0.993169	0.0560049	0.0219392
0.7	0.007	0.000933333	0.381888	0.360464	0.0214244	1	-0.356675	-4.96185	-6.97675	-0.962628	0.145838	-1.02036	0.0577363	0.0220488
0.7	0.007	0.000875	0.368724	0.351409	0.0173149	1	-0.356675	-4.96185	-7.04129	-0.997707	0.135957	-1.0458	0.0480972	0.0177346
0.7	0.007	0.000823529	0.352356	0.343111	0.00924487	1	-0.356675	-4.96185	-7.10191	-1.04311	0.124155	-1.0697	0.0265876	0.00936831
0.7	0.007	0.000777778	0.346834	0.335467	0.0113667	1	-0.356675	-4.96185	-7.15907	-1.05891	0.120294	-1.09223	0.0333218	0.0115571
0.7	0.007	0.000736842	0.337222	0.328393	0.00882882	1	-0.356675	-4.96185	-7.21314	-1.08701	0.113719	-1.11354	0.0265298	0.00894645
0.7	0.007	0.0007	0.318539	0.32182	-0.00328191	1	-0.356675	-4.96185	-7.26443	-1.14401	0.101467	-1.13376	-0.0102503	-0.00326512
0.7	0.007	0.000666667	0.309249	0.31569	-0.00644107	1	-0.356675	-4.96185	-7.31322	-1.17361	0.0956351	-1.15299	-0.0206141	-0.00637491
0.7	0.007	0.000636364	0.308837	0.309954	-0.00111683	1	-0.356675	-4.96185	-7.35974	-1.17494	0.0953806	-1.17133	-0.0036097	-0.00111481
0.7	0.007	0.000608696	0.29434	0.304571	-0.0102306	1	-0.356675	-4.96185	-7.40419	-1.22302	0.086636	-1.18885	-0.0341675	-0.0100569
0.7	0.007	0.000583333	0.283408	0.299504	-0.0160958	1	-0.356675	-4.96185	-7.44675	-1.26087	0.0803201	-1.20563	-0.0552396	-0.0156553
0.2	0.004	0.000666667	0.0234392	0.0489828	-0.0255435
0.2	0.00363636	0.000666667	0.0219941	0.0470607	-0.0250666
0.2	0.00333333	0.000666667	0.0229548	0.0453719	-0.0224171
0.2	0.00307692	0.000666667	0.0158921	0.043872	-0.0279798
0.2	0.00285714	0.000666667	0.0135894	0.0425275	-0.0289381
0.2	0.00266667	0.000666667	0.0168447	0.0413128	-0.0244681
0.2	0.0025	0.000666667	0.01426	0.040208	-0.025948
0.2	0.00235294	0.000666667	0.0213216	0.0391972	-0.0178755
0.2	0.00222222	0.000666667	0.0152986	0.0382674	-0.0229688
0.2	0.00210526	0.000666667	0.0158685	0.0374082	-0.0215397
0.2	0.002	0.000666667	0.0129944	0.0366109	-0.0236165
0.2	0.00190476	0.000666667	0.01898	0.0358683	-0.0168883
0.2	0.00181818	0.000666667	0.013556	0.0351743	-0.0216183
0.2	0.00173913	0.000666667	0.0194156	0.0345237	-0.0151081
0.2	0.00166667	0.000666667	0.0143331	0.0339121	-0.019579
0.2	0.0016	0.000666667	0.0159978	0.0333356	-0.0173378
0.2	0.00153846	0.000666667	0.020576	0.032791	-0.0122149
0.2	0.00148148	0.000666667	0.0172862	0.0322753	-0.0149891
0.2	0.00142857	0.000666667	0.0188263	0.0317861	-0.0129598
0.2	0.00137931	0.000666667	0.0245816	0.031321	-0.00673943
0.2	0.00133333	0.000666667	0.024369	0.0308782	-0.00650922
0.35	0.007	0.00116667	0.0981835	0.159883	-0.0616997
0.35	0.00636364	0.00116667	0.0973752	0.153609	-0.0562342
0.35	0.00583333	0.00116667	0.096968	0.148097	-0.0511292
0.35	0.00538462	0.00116667	0.096277	0.143201	-0.0469242
0.35	0.005	0.00116667	0.0939497	0.138813	-0.0448629
0.35	0.00466667	0.00116667	0.0922609	0.134848	-0.0425871
0.35	0.004375	0.00116667	0.0886155	0.131242	-0.0426264
0.35	0.00411765	0.00116667	0.0863437	0.127942	-0.0415987
0.35	0.00388889	0.00116667	0.083599	0.124907	-0.0413085
0.35	0.00368421	0.00116667	0.0814546	0.122103	-0.0406484
0.35	0.0035	0.00116667	0.0782398	0.119501	-0.0412609
0.35	0.00333333	0.00116667	0.0760348	0.117077	-0.041042
0.35	0.00318182	0.00116667	0.0706513	0.114811	-0.0441602
0.35	0.00304348	0.00116667	0.0686254	0.112688	-0.0440624
0.35	0.00291667	0.00116667	0.067059	0.110691	-0.0436325
0.35	0.0028	0.00116667	0.0647192	0.10881	-0.0440906
0.35	0.00269231	0.00116667	0.0617666	0.107032	-0.0452655
0.35	0.00259259	0.00116667	0.0593671	0.105349	-0.0459819
0.35	0.0025	0.00116667	0.0579248	0.103752	-0.0458272
0.35	0.00241379	0.00116667	0.0579825	0.102234	-0.0442516
0.35	0.00233333	0.00116667	0.0572388	0.100789	-0.0435499
0.5	0.01	0.00166667	0.194565	0.339822	-0.145256
0.5	0.00909091	0.00166667	0.193546	0.326487	-0.132941
0.5	0.00833333	0.00166667	0.193648	0.314771	-0.121124
0.5	0.00769231	0.00166667	0.188328	0.304365	-0.116037
0.5	0.00714286	0.00166667	0.182878	0.295038	-0.112159
0.5	0.00666667	0.00166667	0.178918	0.286611	-0.107693
0.5	0.00625	0.00166667	0.178831	0.278946	-0.100116
0.5	0.00588235	0.00166667	0.182987	0.271933	-0.088946
0.5	0.00555556	0.00166667	0.175421	0.265483	-0.0900617
0.5	0.00526316	0.00166667	0.175421	0.259522	-0.0841013
0.5	0.005	0.00166667	0.169155	0.253991	-0.084836
0.5	0.0047619	0.00166667	0.171111	0.248839	-0.0777285
0.5	0.00454545	0.00166667	0.157394	0.244025	-0.0866305
0.5	0.00434783	0.00166667	0.151424	0.239511	-0.0880875
0.5	0.00416667	0.00166667	0.160899	0.235268	-0.0743689
0.5	0.004	0.00166667	0.151775	0.231268	-0.0794936
0.5	0.00384615	0.00166667	0.150078	0.22749	-0.0774123
0.5	0.0037037	0.00166667	0.149829	0.223913	-0.0740837
0.5	0.00357143	0.00166667	0.138987	0.220518	-0.0815317
0.5	0.00344828	0.00166667	0.127188	0.217292	-0.0901046
0.5	0.00333333	0.00166667	0.109727	0.21422	-0.104494
0.7	0.014	0.00233333	0.413153	0.692073	-0.27892
0.7	0.0127273	0.00233333	0.411064	0.664917	-0.253853
0.7	0.0116667	0.00233333	0.392723	0.641056	-0.248334
0.7	0.0107692	0.00233333	0.370467	0.619863	-0.249396
0.7	0.01	0.00233333	0.37626	0.600867	-0.224607
0.7	0.00933333	0.00233333	0.37298	0.583706	-0.210725
0.7	0.00875	0.00233333	0.363891	0.568096	-0.204205
0.7	0.00823529	0.00233333	0.343637	0.553814	-0.210176
0.7	0.00777778	0.00233333	0.344569	0.540677	-0.196108
0.7	0.00736842	0.00233333	0.333061	0.528537	-0.195476
0.7	0.007	0.00233333	0.316566	0.517273	-0.200706
0.7	0.00666667	0.00233333	0.322234	0.506781	-0.184546
0.7	0.00636364	0.00233333	0.298566	0.496975	-0.198409
0.7	0.00608696	0.00233333	0.2976	0.487783	-0.190183
0.7	0.00583333	0.00233333	0.302019	0.479141	-0.177122
0.7	0.0056	0.00233333	0.302085	0.470996	-0.168912
0.7	0.00538462	0.00233333	0.28883	0.463301	-0.174471
0.7	0.00518519	0.00233333	0.269567	0.456015	-0.186448
0.7	0.005	0.00233333	0.265516	0.449103	-0.183587
0.7	0.00482759	0.00233333	0.253977	0.442532	-0.188555
0.7	0.00466667	0.00233333	0.246248	0.436276	-0.190028

## Sheet: Figure 3B
[LLA]0	[I]0	[cat]0	-d[LLA]/dt	-d[LLA]/dt^	res	1	ln[LLA]	ln[I]	ln[cat]	ln(-d[LLA]/dt)	W	y^	res	wres			Parameters		errors			Statistics				parity line
0.2	0.002	0.001	0.0347143	0.0281987	0.0065156											ln k	1.51788	+/-	0.0679495		N	84				0	0
0.22	0.0022	0.0011	0.0397377	0.0343293	0.0054084											a+b	1.64654	+/-	0.0297424		SSWR	0.00591864				0.7	0.7
0.24	0.0024	0.0012	0.0428996	0.0410829	0.00181669											c	0.417482	+/-	0.0149856		se	0.00854808
0.26	0.0026	0.0013	0.050412	0.0484631	0.00194892											b	0.394175		fixed		RMSE	0.00907356
0.28	0.0028	0.0014	0.059398	0.056473	0.00292501
0.3	0.003	0.0015	0.0654577	0.0651157	0.000341919											k	4.56256	×/÷	1.07031
0.32	0.0032	0.0016	0.0755338	0.074394	0.00113976
0.34	0.0034	0.0017	0.088143	0.0843105	0.00383255
0.36	0.0036	0.0018	0.103613	0.0948676	0.00874536
0.38	0.0038	0.0019	0.11287	0.106068	0.00680221
0.4	0.004	0.002	0.1267	0.117913	0.00878715
0.42	0.0042	0.0021	0.152181	0.130406	0.0217748											XTWX				XTWY
0.44	0.0044	0.0022	0.169661	0.143548	0.0261125											3.03466	-1.38052	-14.9229		-3.89686
0.46	0.0046	0.0023	0.180541	0.157342	0.0231996											-1.38052	0.739925	6.90233		2.00445
0.48	0.0048	0.0024	0.197215	0.171789	0.0254258											-14.9229	6.90233	73.824		19.5339
0.5	0.005	0.0025	0.221933	0.186891	0.0350424
0.52	0.0052	0.0026	0.242414	0.202649	0.0397651											(XTWX)-1
0.54	0.0054	0.0027	0.254447	0.219066	0.0353808											63.1881	-9.8418	13.6931
0.56	0.0056	0.0028	0.269709	0.236143	0.0335658											-9.8418	12.1064	-3.12135
0.58	0.0058	0.0029	0.287192	0.253881	0.0333109											13.6931	-3.12135	3.07333
0.6	0.006	0.003	0.305869	0.272282	0.0335871
0.62	0.0062	0.0031	0.340703	0.291348	0.0493555
0.64	0.0064	0.0032	0.365009	0.311079	0.0539296
0.66	0.0066	0.0033	0.374071	0.331478	0.0425927
0.68	0.0068	0.0034	0.413343	0.352545	0.0607972
0.7	0.007	0.0035	0.450967	0.374282	0.0766852
0.72	0.0072	0.0036	0.463274	0.39669	0.0665841
0.74	0.0074	0.0037	0.476823	0.41977	0.0570525
0.76	0.0076	0.0038	0.499516	0.443524	0.0559919
0.78	0.0078	0.0039	0.521094	0.467952	0.0531417
0.8	0.008	0.004	0.547077	0.493056	0.0540213
0.2	0.002	0.001	0.0209744	0.0281987	-0.00722434
0.2	0.002	0.0008	0.0193015	0.0258484	-0.0065469
0.2	0.002	0.000666667	0.017318	0.0240743	-0.00675633
0.2	0.002	0.000571429	0.015404	0.0226696	-0.00726559
0.2	0.002	0.0005	0.0136949	0.0215193	-0.00782433
0.2	0.002	0.000444444	0.0133879	0.0205531	-0.0071652
0.2	0.002	0.0004	0.0134653	0.0197257	-0.00626037
0.2	0.002	0.000363636	0.0134021	0.0190059	-0.00560384
0.2	0.002	0.000333333	0.0124348	0.0183718	-0.00593697
0.2	0.002	0.000307692	0.0126651	0.0178072	-0.00514206
0.2	0.002	0.000285714	0.01331	0.0172999	-0.00398989
0.2	0.002	0.000266667	0.0113329	0.0168406	-0.00550764
0.2	0.002	0.00025	0.0124328	0.016422	-0.00398919
0.2	0.002	0.000235294	0.0136895	0.0160383	-0.00234873
0.2	0.002	0.000222222	0.0140942	0.0156847	-0.0015905
0.2	0.002	0.000210526	0.0128937	0.0153574	-0.0024637
0.2	0.002	0.0002	0.0123892	0.0150533	-0.00266404
0.2	0.002	0.000190476	0.0104541	0.0147695	-0.00431544
0.2	0.002	0.000181818	0.0102134	0.014504	-0.0042906
0.2	0.002	0.000173913	0.0133115	0.0142547	-0.000943186
0.2	0.002	0.000166667	0.0112618	0.0140201	-0.00275827
0.35	0.0035	0.00175	0.162778	0.0895088	0.0732693
0.35	0.0035	0.0014	0.148717	0.0820485	0.0666685
0.35	0.0035	0.00116667	0.129804	0.076417	0.0533867
0.35	0.0035	0.001	0.119214	0.0719583	0.0472555
0.35	0.0035	0.000875	0.107045	0.0683068	0.0387382
0.35	0.0035	0.000777778	0.0970024	0.0652401	0.0317623
0.35	0.0035	0.0007	0.0850684	0.0626137	0.0224547
0.35	0.0035	0.000636364	0.0715515	0.060329	0.0112225
0.35	0.0035	0.000583333	0.0636025	0.0583161	0.00528637
0.35	0.0035	0.000538462	0.0535372	0.0565238	-0.00298656
0.35	0.0035	0.0005	0.0528634	0.0549135	-0.00205016
0.35	0.0035	0.000466667	0.0492	0.0534556	-0.00425562
0.35	0.0035	0.0004375	0.0473744	0.052127	-0.00475253
0.35	0.0035	0.000411765	0.0486925	0.0509089	-0.00221642
0.35	0.0035	0.000388889	0.0489504	0.0497866	-0.00083629
0.35	0.0035	0.000368421	0.0404191	0.0487478	-0.00832872
0.35	0.0035	0.00035	0.0348781	0.0477823	-0.0129042
0.35	0.0035	0.000333333	0.0438765	0.0468817	-0.00300526
0.35	0.0035	0.000318182	0.0376396	0.0460388	-0.00839925
0.35	0.0035	0.000304348	0.0417063	0.0452476	-0.00354123
0.35	0.0035	0.000291667	0.0407967	0.0445027	-0.00370604
0.5	0.005	0.0025	0.324023	0.186891	0.137132
0.5	0.005	0.002	0.311626	0.171314	0.140312
0.5	0.005	0.00166667	0.291538	0.159555	0.131983
0.5	0.005	0.00142857	0.247332	0.150246	0.0970859
0.5	0.005	0.00125	0.227744	0.142622	0.0851225
0.5	0.005	0.00111111	0.214447	0.136219	0.0782281
0.5	0.005	0.001	0.206055	0.130735	0.0753202
0.5	0.005	0.000909091	0.201053	0.125964	0.0750883
0.5	0.005	0.000833333	0.192289	0.121762	0.0705276
0.5	0.005	0.000769231	0.167579	0.118019	0.0495593
0.5	0.005	0.000714286	0.165319	0.114657	0.0506617
0.5	0.005	0.000666667	0.162287	0.111613	0.0506734
0.5	0.005	0.000625	0.167115	0.108839	0.0582762
0.5	0.005	0.000588235	0.170113	0.106296	0.0638176
0.5	0.005	0.000555556	0.160167	0.103952	0.0562141
0.5	0.005	0.000526316	0.166465	0.101783	0.0646817
0.5	0.005	0.0005	0.159919	0.0997675	0.0601512
0.5	0.005	0.00047619	0.158211	0.097887	0.060324
0.5	0.005	0.000454545	0.154554	0.0961271	0.0584272
0.5	0.005	0.000434783	0.150757	0.094475	0.0562818
0.5	0.005	0.000416667	0.142757	0.0929198	0.0498367
0.7	0.007	0.0035	0.559762	0.374282	0.185479
0.7	0.007	0.0028	0.545885	0.343087	0.202798
0.7	0.007	0.00233333	0.509825	0.319539	0.190286
0.7	0.007	0.002	0.478473	0.300895	0.177578
0.7	0.007	0.00175	0.449424	0.285626	0.163798
0.7	0.007	0.00155556	0.433138	0.272802	0.160336
0.7	0.007	0.0014	0.420349	0.26182	0.158529
0.7	0.007	0.00127273	0.405909	0.252266	0.153642
0.7	0.007	0.00116667	0.400416	0.24385	0.156566
0.7	0.007	0.00107692	0.397765	0.236355	0.16141
0.7	0.007	0.001	0.391737	0.229622	0.162116
0.7	0.007	0.000933333	0.381888	0.223525	0.158362
0.7	0.007	0.000875	0.368724	0.21797	0.150755
0.7	0.007	0.000823529	0.352356	0.212876	0.13948
0.7	0.007	0.000777778	0.346834	0.208184	0.13865
0.7	0.007	0.000736842	0.337222	0.20384	0.133383
0.7	0.007	0.0007	0.318539	0.199803	0.118736
0.7	0.007	0.000666667	0.309249	0.196037	0.113213
0.7	0.007	0.000636364	0.308837	0.192512	0.116325
0.7	0.007	0.000608696	0.29434	0.189203	0.105137
0.7	0.007	0.000583333	0.283408	0.186089	0.0973191
0.2	0.004	0.000666667	0.0234392	0.0321535	-0.00871425	1	-1.60944	-5.52146	-7.31322	-3.75334	0.000549398	-3.43723	-0.31611	-0.00740937
0.2	0.00363636	0.000666667	0.0219941	0.0308992	-0.00890514	1	-1.60944	-5.61677	-7.31322	-3.81698	0.000483739	-3.47702	-0.339958	-0.00747706
0.2	0.00333333	0.000666667	0.0229548	0.0297969	-0.00684212	1	-1.60944	-5.70378	-7.31322	-3.77423	0.000526923	-3.51335	-0.260878	-0.0059884
0.2	0.00307692	0.000666667	0.0158921	0.0288177	-0.0129255	1	-1.60944	-5.78383	-7.31322	-4.14193	0.00025256	-3.54677	-0.595164	-0.00945843
0.2	0.00285714	0.000666667	0.0135894	0.0279397	-0.0143504	1	-1.60944	-5.85793	-7.31322	-4.29847	0.000184671	-3.57771	-0.720762	-0.0097947
0.2	0.00266667	0.000666667	0.0168447	0.0271465	-0.0103018	1	-1.60944	-5.92693	-7.31322	-4.08372	0.000283744	-3.60651	-0.477211	-0.00803847
0.2	0.0025	0.000666667	0.01426	0.0264248	-0.0121648	1	-1.60944	-5.99146	-7.31322	-4.25029	0.000203349	-3.63345	-0.616842	-0.00879619
0.2	0.00235294	0.000666667	0.0213216	0.0257644	-0.00444276	1	-1.60944	-6.05209	-7.31322	-3.84803	0.000454612	-3.65876	-0.189271	-0.00403557
0.2	0.00222222	0.000666667	0.0152986	0.0251569	-0.00985826	1	-1.60944	-6.10925	-7.31322	-4.17999	0.000234047	-3.68262	-0.497369	-0.00760905
0.2	0.00210526	0.000666667	0.0158685	0.0245954	-0.00872688	1	-1.60944	-6.16331	-7.31322	-4.14342	0.000251809	-3.7052	-0.438223	-0.00695394
0.2	0.002	0.000666667	0.0129944	0.0240743	-0.0110799	1	-1.60944	-6.21461	-7.31322	-4.34323	0.000168855	-3.72661	-0.616624	-0.00801267
0.2	0.00190476	0.000666667	0.01898	0.0235889	-0.00460885	1	-1.60944	-6.2634	-7.31322	-3.96437	0.000360242	-3.74698	-0.217388	-0.00412603
0.2	0.00181818	0.000666667	0.013556	0.0231352	-0.00957915	1	-1.60944	-6.30992	-7.31322	-4.30092	0.000183766	-3.7664	-0.534523	-0.00724601
0.2	0.00173913	0.000666667	0.0194156	0.0227098	-0.0032942	1	-1.60944	-6.35437	-7.31322	-3.94168	0.000376966	-3.78496	-0.15672	-0.00304281
0.2	0.00166667	0.000666667	0.0143331	0.0223099	-0.00797679	1	-1.60944	-6.39693	-7.31322	-4.24519	0.000205437	-3.80273	-0.442459	-0.0063418
0.2	0.0016	0.000666667	0.0159978	0.0219329	-0.00593507	1	-1.60944	-6.43775	-7.31322	-4.1353	0.00025593	-3.81977	-0.315535	-0.00504787
0.2	0.00153846	0.000666667	0.020576	0.0215767	-0.00100063	1	-1.60944	-6.47697	-7.31322	-3.88363	0.000423373	-3.83614	-0.0474854	-0.000977061
0.2	0.00148148	0.000666667	0.0172862	0.0212394	-0.00395314	1	-1.60944	-6.51471	-7.31322	-4.05784	0.000298814	-3.8519	-0.205946	-0.00356003
0.2	0.00142857	0.000666667	0.0188263	0.0209193	-0.00209306	1	-1.60944	-6.55108	-7.31322	-3.9725	0.000354428	-3.86708	-0.105421	-0.00198468
0.2	0.00137931	0.000666667	0.0245816	0.0206151	0.0039665	1	-1.60944	-6.58617	-7.31322	-3.70576	0.000604255	-3.88173	0.175975	0.00432574
0.2	0.00133333	0.000666667	0.024369	0.0203254	0.00404362	1	-1.60944	-6.62007	-7.31322	-3.71444	0.000593848	-3.89588	0.181441	0.00442155
0.35	0.007	0.00116667	0.0981835	0.102062	-0.00387862	1	-1.04982	-4.96185	-6.7536	-2.32092	0.00964	-2.28217	-0.0387435	-0.00380397
0.35	0.00636364	0.00116667	0.0973752	0.0980808	-0.000705546	1	-1.04982	-5.05716	-6.7536	-2.32918	0.00948194	-2.32196	-0.00721951	-0.000703002
0.35	0.00583333	0.00116667	0.096968	0.0945819	0.00238614	1	-1.04982	-5.14417	-6.7536	-2.33337	0.0094028	-2.35829	0.0249154	0.00241599
0.35	0.00538462	0.00116667	0.096277	0.0914735	0.00480348	1	-1.04982	-5.22421	-6.7536	-2.34053	0.00926926	-2.39171	0.05118	0.00492745
0.35	0.005	0.00116667	0.0939497	0.0886868	0.00526296	1	-1.04982	-5.29832	-6.7536	-2.365	0.00882655	-2.42264	0.0576491	0.00541612
0.35	0.00466667	0.00116667	0.0922609	0.0861688	0.00609218	1	-1.04982	-5.36731	-6.7536	-2.38313	0.00851208	-2.45145	0.0683132	0.00630264
0.35	0.004375	0.00116667	0.0886155	0.0838781	0.00473746	1	-1.04982	-5.43185	-6.7536	-2.42345	0.00785271	-2.47839	0.0549429	0.00486879
0.35	0.00411765	0.00116667	0.0863437	0.0817818	0.00456189	1	-1.04982	-5.49247	-6.7536	-2.44942	0.00745523	-2.5037	0.0542811	0.00468683
0.35	0.00388889	0.00116667	0.083599	0.0798533	0.00374568	1	-1.04982	-5.54963	-6.7536	-2.48172	0.0069888	-2.52756	0.04584	0.00383218
0.35	0.00368421	0.00116667	0.0814546	0.0780711	0.00338355	1	-1.04982	-5.6037	-6.7536	-2.50771	0.00663486	-2.55014	0.0424265	0.00345583
0.35	0.0035	0.00116667	0.0782398	0.076417	0.00182272	1	-1.04982	-5.65499	-6.7536	-2.54798	0.00612146	-2.57155	0.0235723	0.00184429
0.35	0.00333333	0.00116667	0.0760348	0.0748762	0.00115852	1	-1.04982	-5.70378	-6.7536	-2.57656	0.00578128	-2.59192	0.0153539	0.00116743
0.35	0.00318182	0.00116667	0.0706513	0.0734361	-0.00278479	1	-1.04982	-5.7503	-6.7536	-2.65	0.00499161	-2.61134	-0.038659	-0.00273131
0.35	0.00304348	0.00116667	0.0686254	0.0720858	-0.0034604	1	-1.04982	-5.79475	-6.7536	-2.67909	0.00470945	-2.6299	-0.0491944	-0.00337599
0.35	0.00291667	0.00116667	0.067059	0.0708163	-0.00375733	1	-1.04982	-5.83731	-6.7536	-2.70218	0.00449691	-2.64767	-0.0545168	-0.00365584
0.35	0.0028	0.00116667	0.0647192	0.0696197	-0.00490048	1	-1.04982	-5.87814	-6.7536	-2.7377	0.00418857	-2.66471	-0.0729894	-0.00472382
0.35	0.00269231	0.00116667	0.0617666	0.068489	-0.00672242	1	-1.04982	-5.91736	-6.7536	-2.78439	0.00381511	-2.68108	-0.103311	-0.00638115
0.35	0.00259259	0.00116667	0.0593671	0.0674184	-0.00805131	1	-1.04982	-5.9551	-6.7536	-2.82402	0.00352445	-2.69684	-0.127178	-0.00755018
0.35	0.0025	0.00116667	0.0579248	0.0664025	-0.00847767	1	-1.04982	-5.99146	-6.7536	-2.84861	0.00335529	-2.71202	-0.136589	-0.00791187
0.35	0.00241379	0.00116667	0.0579825	0.0654368	-0.00745428	1	-1.04982	-6.02656	-6.7536	-2.84761	0.00336197	-2.72667	-0.120943	-0.00701259
0.35	0.00233333	0.00116667	0.0572388	0.0645172	-0.00727835	1	-1.04982	-6.06046	-6.7536	-2.86052	0.00327628	-2.74082	-0.119699	-0.00685143
0.5	0.01	0.00166667	0.194565	0.213101	-0.0185361	1	-0.693147	-4.60517	-6.39693	-1.63699	0.0378556	-1.54599	-0.0910003	-0.0177055
0.5	0.00909091	0.00166667	0.193546	0.204788	-0.0112421	1	-0.693147	-4.70048	-6.39693	-1.64224	0.0374602	-1.58578	-0.0564607	-0.0109278
0.5	0.00833333	0.00166667	0.193648	0.197483	-0.00383539	1	-0.693147	-4.78749	-6.39693	-1.64172	0.0374994	-1.6221	-0.0196125	-0.00379791
0.5	0.00769231	0.00166667	0.188328	0.190993	-0.00266486	1	-0.693147	-4.86753	-6.39693	-1.66957	0.0354674	-1.65552	-0.0140509	-0.00264618
0.5	0.00714286	0.00166667	0.182878	0.185174	-0.00229568	1	-0.693147	-4.94164	-6.39693	-1.69893	0.0334445	-1.68646	-0.0124749	-0.00228139
0.5	0.00666667	0.00166667	0.178918	0.179917	-0.000998725	1	-0.693147	-5.01064	-6.39693	-1.72083	0.0320116	-1.71526	-0.00556651	-0.000995948
0.5	0.00625	0.00166667	0.178831	0.175134	0.003697	1	-0.693147	-5.07517	-6.39693	-1.72132	0.0319804	-1.74221	0.0208898	0.00373574
0.5	0.00588235	0.00166667	0.182987	0.170757	0.0122306	1	-0.693147	-5.1358	-6.39693	-1.69834	0.0334844	-1.76751	0.0691771	0.0126585
0.5	0.00555556	0.00166667	0.175421	0.16673	0.008691	1	-0.693147	-5.19296	-6.39693	-1.74056	0.0307726	-1.79138	0.050813	0.00891368
0.5	0.00526316	0.00166667	0.175421	0.163009	0.012412	1	-0.693147	-5.24702	-6.39693	-1.74057	0.0307725	-1.81395	0.0733831	0.0128729
0.5	0.005	0.00166667	0.169155	0.159555	0.00959969	1	-0.693147	-5.29832	-6.39693	-1.77694	0.0286135	-1.83536	0.0584248	0.00988285
0.5	0.0047619	0.00166667	0.171111	0.156338	0.0147725	1	-0.693147	-5.34711	-6.39693	-1.76544	0.0292789	-1.85573	0.0902888	0.0154494
0.5	0.00454545	0.00166667	0.157394	0.153331	0.00406271	1	-0.693147	-5.39363	-6.39693	-1.849	0.0247729	-1.87515	0.0261513	0.00411606
0.5	0.00434783	0.00166667	0.151424	0.150512	0.000911378	1	-0.693147	-5.43808	-6.39693	-1.88767	0.0229291	-1.89371	0.00603692	0.000914131
0.5	0.00416667	0.00166667	0.160899	0.147861	0.0130374	1	-0.693147	-5.48064	-6.39693	-1.82698	0.0258884	-1.91148	0.0845	0.013596
0.5	0.004	0.00166667	0.151775	0.145363	0.00641194	1	-0.693147	-5.52146	-6.39693	-1.88536	0.0230356	-1.92852	0.0431647	0.00655132
0.5	0.00384615	0.00166667	0.150078	0.143002	0.00707564	1	-0.693147	-5.56068	-6.39693	-1.8966	0.0225233	-1.9449	0.0482941	0.00724787
0.5	0.0037037	0.00166667	0.149829	0.140767	0.00906219	1	-0.693147	-5.59842	-6.39693	-1.89826	0.0224487	-1.96065	0.06239	0.00934782
0.5	0.00357143	0.00166667	0.138987	0.138646	0.000341113	1	-0.693147	-5.63479	-6.39693	-1.97338	0.0193173	-1.97583	0.00245731	0.000341533
0.5	0.00344828	0.00166667	0.127188	0.136629	-0.0094417	1	-0.693147	-5.66988	-6.39693	-2.06209	0.0161767	-1.99048	-0.0716083	-0.00910769
0.5	0.00333333	0.00166667	0.109727	0.134709	-0.0249825	1	-0.693147	-5.70378	-6.39693	-2.20976	0.0120399	-2.00464	-0.205126	-0.0225078
0.7	0.014	0.00233333	0.413153	0.426774	-0.0136212	1	-0.356675	-4.2687	-6.06046	-0.883937	0.170695	-0.8515	-0.0324371	-0.0134015
0.7	0.0127273	0.00233333	0.411064	0.410126	0.00093755	1	-0.356675	-4.36401	-6.06046	-0.889007	0.168973	-0.891291	0.00228339	0.00093862
0.7	0.0116667	0.00233333	0.392723	0.395495	-0.00277286	1	-0.356675	-4.45102	-6.06046	-0.934652	0.154231	-0.927616	-0.00703581	-0.00276312
0.7	0.0107692	0.00233333	0.370467	0.382498	-0.0120306	1	-0.356675	-4.53106	-6.06046	-0.99299	0.137246	-0.961033	-0.0319579	-0.0118393
0.7	0.01	0.00233333	0.37626	0.370845	0.00541532	1	-0.356675	-4.60517	-6.06046	-0.977474	0.141572	-0.991971	0.0144971	0.00545467
0.7	0.00933333	0.00233333	0.37298	0.360316	0.0126645	1	-0.356675	-4.67416	-6.06046	-0.98623	0.139114	-1.02077	0.0345448	0.0128845
0.7	0.00875	0.00233333	0.363891	0.350737	0.0131539	1	-0.356675	-4.7387	-6.06046	-1.0109	0.132417	-1.04772	0.0368173	0.0133975
0.7	0.00823529	0.00233333	0.343637	0.341972	0.00166571	1	-0.356675	-4.79933	-6.06046	-1.06817	0.118087	-1.07303	0.00485908	0.00166976
0.7	0.00777778	0.00233333	0.344569	0.333908	0.0106608	1	-0.356675	-4.85648	-6.06046	-1.06546	0.118728	-1.09689	0.0314283	0.0108292
0.7	0.00736842	0.00233333	0.333061	0.326455	0.00660617	1	-0.356675	-4.91055	-6.06046	-1.09943	0.11093	-1.11946	0.020034	0.00667257
0.7	0.007	0.00233333	0.316566	0.319539	-0.00297258	1	-0.356675	-4.96185	-6.06046	-1.15022	0.100214	-1.14088	-0.00934627	-0.00295871
0.7	0.00666667	0.00233333	0.322234	0.313096	0.00913828	1	-0.356675	-5.01064	-6.06046	-1.13248	0.103835	-1.16125	0.028769	0.00927036
0.7	0.00636364	0.00233333	0.298566	0.307074	-0.00850831	1	-0.356675	-5.05716	-6.06046	-1.20877	0.0891414	-1.18067	-0.0280988	-0.00838933
0.7	0.00608696	0.00233333	0.2976	0.301428	-0.00382813	1	-0.356675	-5.10161	-6.06046	-1.21201	0.0885656	-1.19922	-0.0127813	-0.00380371
0.7	0.00583333	0.00233333	0.302019	0.296119	0.00589917	1	-0.356675	-5.14417	-6.06046	-1.19727	0.0912152	-1.21699	0.0197257	0.00595754
0.7	0.0056	0.00233333	0.302085	0.291116	0.0109689	1	-0.356675	-5.18499	-6.06046	-1.19705	0.0912551	-1.23403	0.0369864	0.011173
0.7	0.00538462	0.00233333	0.28883	0.286388	0.00244208	1	-0.356675	-5.22421	-6.06046	-1.24192	0.0834227	-1.25041	0.00849103	0.00245246
0.7	0.00518519	0.00233333	0.269567	0.281911	-0.0123436	1	-0.356675	-5.26195	-6.06046	-1.31094	0.0726665	-1.26616	-0.044773	-0.0120693
0.7	0.005	0.00233333	0.265516	0.277663	-0.0121471	1	-0.356675	-5.29832	-6.06046	-1.32608	0.0704987	-1.28135	-0.0447334	-0.0118774
0.7	0.00482759	0.00233333	0.253977	0.273625	-0.0196474	1	-0.356675	-5.33341	-6.06046	-1.37051	0.0645045	-1.296	-0.0745126	-0.0189245
0.7	0.00466667	0.00233333	0.246248	0.269779	-0.0235316	1	-0.356675	-5.36731	-6.06046	-1.40142	0.060638	-1.31015	-0.0912664	-0.0224742

## Sheet: Figure 4A
[LLA]0	[I]0	[cat]0	-d[LLA]/dt	-d[LLA]/dt^	res	i = 1	ln[LLA]	ln[I]	ln[cat]	i = 2	ln(-d[LLA]/dt)	W	y^	res	wres			Parameters		errors			Statistics			parity line
0.2	0.002	0.001	0.0347143	0.0289762	0.00573811	1	-1.60944	-6.21461	-6.90776	0	-3.3606	0.00120508	-3.54128	0.180677	0.00627209		ln k1	3.79717	+/-	0.196961		N	199			0	0
0.22	0.0022	0.0011	0.0397377	0.0354213	0.00431641	1	-1.51413	-6.1193	-6.81245	0	-3.22546	0.00157908	-3.34044	0.114987	0.00456933		a	1.31607	+/-	0.0538491		SSWR	0.0491771			0.7	0.7
0.24	0.0024	0.0012	0.0428996	0.0425493	0.000350301	1	-1.42712	-6.03229	-6.72543	0	-3.14889	0.00184038	-3.15709	0.00819911	0.000351739		b	0.352981	+/-	0.0357573		se	0.0211439
0.26	0.0026	0.0013	0.050412	0.0503667	4.53256e-05	1	-1.34707	-5.95224	-6.64539	0	-2.98753	0.00254137	-2.98843	0.000899507	4.5346e-05		c	0.438157	+/-	0.0169408		RMSE	0.0174162
0.28	0.0028	0.0014	0.059398	0.0588794	0.000518672	1	-1.27297	-5.87814	-6.57128	0	-2.82349	0.00352813	-2.83226	0.00877048	0.000520949		ln k2	4.23857	+/-	0.0457552
0.3	0.003	0.0015	0.0654577	0.0680929	-0.00263524	1	-1.20397	-5.80914	-6.50229	0	-2.72635	0.0042847	-2.68688	-0.0394695	-0.00258358
0.32	0.0032	0.0016	0.0755338	0.0780125	-0.00247872	1	-1.13943	-5.7446	-6.43775	0	-2.58318	0.00570535	-2.55089	-0.0322891	-0.00243892		k1 (M&I sweeps)	44.5749	×/÷	1.2177
0.34	0.0034	0.0017	0.088143	0.088643	-0.00050001	1	-1.07881	-5.68398	-6.37713	0	-2.42879	0.00776919	-2.42314	-0.00565668	-0.000498597		k2 (cat sweep)	69.3087	×/÷	1.04682
0.36	0.0036	0.0018	0.103613	0.0999892	0.00362381	1	-1.02165	-5.62682	-6.31997	0	-2.26709	0.0107356	-2.30269	0.0356007	0.00368869
0.38	0.0038	0.0019	0.11287	0.112055	0.000814685	1	-0.967584	-5.57275	-6.2659	0	-2.18152	0.0127396	-2.18876	0.00724408	0.000817639
0.4	0.004	0.002	0.1267	0.124846	0.00185474	1	-0.916291	-5.52146	-6.21461	0	-2.06593	0.016053	-2.08068	0.014747	0.00186845
0.42	0.0042	0.0021	0.152181	0.138364	0.0138167	1	-0.867501	-5.47267	-6.16582	0	-1.88269	0.023159	-1.97787	0.0951808	0.0144847		XTWX						XTWY
0.44	0.0044	0.0022	0.169661	0.152615	0.0170461	1	-0.820981	-5.42615	-6.1193	0	-1.77395	0.0287848	-1.87984	0.105885	0.0179645		5.67341	-2.45159	-28.1459	-33.7416	0		-6.40262
0.46	0.0046	0.0023	0.180541	0.167601	0.0129406	1	-0.776529	-5.3817	-6.07485	0	-1.71179	0.0325952	-1.78617	0.0743752	0.0134278		-2.45159	2.2871	22.4807	28.0539	-1.97577		5.5537
0.48	0.0048	0.0024	0.197215	0.183326	0.0138883	1	-0.733969	-5.33914	-6.03229	0	-1.62346	0.0388936	-1.69649	0.0730249	0.0144016		-28.1459	22.4807	253.215	316.304	-22.3486		55.9567
0.5	0.005	0.0025	0.221933	0.199794	0.0221387	1	-0.693147	-5.29832	-5.99146	0	-1.50538	0.0492542	-1.61047	0.105087	0.0233224		-33.7416	28.0539	316.304	398.34	-29.4295		70.2443
0.52	0.0052	0.0026	0.242414	0.217008	0.0254062	1	-0.653926	-5.2591	-5.95224	0	-1.41711	0.0587646	-1.52782	0.110714	0.0268386		0	-1.97577	-22.3486	-29.4295	4.4239		-4.63263
0.54	0.0054	0.0027	0.254447	0.234971	0.019476	1	-0.616186	-5.22136	-5.9145	0	-1.36866	0.0647431	-1.44829	0.0796307	0.0202618
0.56	0.0056	0.0028	0.269709	0.253685	0.0160232	1	-0.579818	-5.18499	-5.87814	0	-1.31041	0.0727427	-1.37166	0.0612472	0.0165189
0.58	0.0058	0.0029	0.287192	0.273155	0.014037	1	-0.544727	-5.1499	-5.84304	0	-1.2476	0.0824792	-1.29772	0.0501115	0.0143916		(XTWX)-1
0.6	0.006	0.003	0.305869	0.293382	0.012487	1	-0.510826	-5.116	-5.80914	0	-1.1846	0.0935561	-1.22628	0.0416814	0.0127491		86.7743	-16.2671	13.8044	4.22773	90.5961
0.62	0.0062	0.0031	0.340703	0.31437	0.0263331	1	-0.478036	-5.08321	-5.77635	0	-1.07674	0.116079	-1.15718	0.0804407	0.0274064		-16.2671	6.48615	-2.93476	-0.758406	-16.9742
0.64	0.0064	0.0032	0.365009	0.336122	0.0288876	1	-0.446287	-5.05146	-5.7446	0	-1.00783	0.133232	-1.09028	0.0824495	0.0300948		13.8044	-2.93476	2.85996	0.148682	14.1263
0.66	0.0066	0.0033	0.374071	0.358639	0.0154323	1	-0.415515	-5.02069	-5.71383	0	-0.98331	0.139929	-1.02544	0.0421302	0.0157597		4.22773	-0.758406	0.148682	0.641942	4.68285
0.68	0.0068	0.0034	0.413343	0.381924	0.0314187	1	-0.385662	-4.99083	-5.68398	0	-0.883479	0.170852	-0.962534	0.0790553	0.0326769		90.5961	-16.9742	14.1263	4.68285	95.1601
0.7	0.007	0.0035	0.450967	0.40598	0.0449874	1	-0.356675	-4.96185	-5.65499	0	-0.79636	0.203372	-0.901451	0.105091	0.0473926
0.72	0.0072	0.0036	0.463274	0.430809	0.0324648	1	-0.328504	-4.93367	-5.62682	0	-0.769436	0.214623	-0.842089	0.0726534	0.0336585
0.74	0.0074	0.0037	0.476823	0.456414	0.0204084	1	-0.301105	-4.90628	-5.59942	0	-0.74061	0.22736	-0.784354	0.0437438	0.0208581
0.76	0.0076	0.0038	0.499516	0.482797	0.0167187	1	-0.274437	-4.87961	-5.57275	0	-0.694116	0.249516	-0.728159	0.0340426	0.0170048
0.78	0.0078	0.0039	0.521094	0.50996	0.0111337	1	-0.248461	-4.85363	-5.54678	0	-0.651825	0.271539	-0.673423	0.0215975	0.0112543
0.8	0.008	0.004	0.547077	0.537905	0.00917195	1	-0.223144	-4.82831	-5.52146	0	-0.603166	0.299293	-0.620073	0.0169075	0.00924971
0.2	0.002	0.001	0.0209744	0.0450546	-0.0240802	0	-1.60944	-6.21461	-6.90776	1	-3.86445	0.000439924	-3.09988	-0.764573	-0.0160364
0.2	0.002	0.0008	0.0193015	0.040858	-0.0215564	0	-1.60944	-6.21461	-7.1309	1	-3.94757	0.000372549	-3.19765	-0.749918	-0.0144746
0.2	0.002	0.000666667	0.017318	0.037721	-0.020403	0	-1.60944	-6.21461	-7.31322	1	-4.05601	0.000299912	-3.27754	-0.778472	-0.0134816
0.2	0.002	0.000571429	0.015404	0.0352574	-0.0198533	0	-1.60944	-6.21461	-7.46737	1	-4.17313	0.000237284	-3.34508	-0.828045	-0.0127552
0.2	0.002	0.0005	0.0136949	0.0332537	-0.0195588	0	-1.60944	-6.21461	-7.6009	1	-4.29073	0.000187551	-3.40359	-0.887141	-0.0121493
0.2	0.002	0.000444444	0.0133879	0.0315811	-0.0181932	0	-1.60944	-6.21461	-7.71869	1	-4.3134	0.000179237	-3.4552	-0.858205	-0.0114896
0.2	0.002	0.0004	0.0134653	0.0301563	-0.016691	0	-1.60944	-6.21461	-7.82405	1	-4.30764	0.000181315	-3.50136	-0.806276	-0.0108568
0.2	0.002	0.000363636	0.0134021	0.0289229	-0.0155208	0	-1.60944	-6.21461	-7.91936	1	-4.31234	0.000179616	-3.54312	-0.769222	-0.0103092
0.2	0.002	0.000333333	0.0124348	0.027841	-0.0154061	0	-1.60944	-6.21461	-8.00637	1	-4.38725	0.000154625	-3.58125	-0.806007	-0.0100226
0.2	0.002	0.000307692	0.0126651	0.0268815	-0.0142164	0	-1.60944	-6.21461	-8.08641	1	-4.36891	0.000160405	-3.61632	-0.752588	-0.0095316
0.2	0.002	0.000285714	0.01331	0.0260226	-0.0127127	0	-1.60944	-6.21461	-8.16052	1	-4.31924	0.000177155	-3.64879	-0.670454	-0.00892372
0.2	0.002	0.000266667	0.0113329	0.0252478	-0.0139148	0	-1.60944	-6.21461	-8.22951	1	-4.48004	0.000128435	-3.67902	-0.801024	-0.00907795
0.2	0.002	0.00025	0.0124328	0.0245438	-0.012111	0	-1.60944	-6.21461	-8.29405	1	-4.38742	0.000154575	-3.7073	-0.680121	-0.00845581
0.2	0.002	0.000235294	0.0136895	0.0239004	-0.0102109	0	-1.60944	-6.21461	-8.35467	1	-4.29112	0.000187403	-3.73386	-0.557264	-0.00762869
0.2	0.002	0.000222222	0.0140942	0.0233093	-0.00921508	0	-1.60944	-6.21461	-8.41183	1	-4.26199	0.000198646	-3.7589	-0.503088	-0.00709063
0.2	0.002	0.000210526	0.0128937	0.0227636	-0.00986984	0	-1.60944	-6.21461	-8.4659	1	-4.35101	0.000166248	-3.78259	-0.56842	-0.00732906
0.2	0.002	0.0002	0.0123892	0.0222577	-0.00986845	0	-1.60944	-6.21461	-8.51719	1	-4.39093	0.000153493	-3.80507	-0.585859	-0.00725835
0.2	0.002	0.000190476	0.0104541	0.0217869	-0.0113328	0	-1.60944	-6.21461	-8.56598	1	-4.56076	0.000109288	-3.82645	-0.734315	-0.0076766
0.2	0.002	0.000181818	0.0102134	0.0213473	-0.0111339	0	-1.60944	-6.21461	-8.6125	1	-4.58405	0.000104314	-3.84683	-0.737226	-0.00752958
0.2	0.002	0.000173913	0.0133115	0.0209356	-0.00762403	0	-1.60944	-6.21461	-8.65696	1	-4.31912	0.000177197	-3.86631	-0.452819	-0.00602771
0.2	0.002	0.000166667	0.0112618	0.0205488	-0.00928698	0	-1.60944	-6.21461	-8.69951	1	-4.48634	0.000126828	-3.88495	-0.601385	-0.00677268
0.35	0.0035	0.00175	0.162778	0.146511	0.0162672	0	-1.04982	-5.65499	-6.34814	1	-1.81537	0.0264967	-1.92066	0.105288	0.0171386
0.35	0.0035	0.0014	0.148717	0.132864	0.0158528	0	-1.04982	-5.65499	-6.57128	1	-1.90571	0.0221168	-2.01843	0.112718	0.016763
0.35	0.0035	0.00116667	0.129804	0.122663	0.00714054	0	-1.04982	-5.65499	-6.7536	1	-2.04173	0.016849	-2.09831	0.0565812	0.00734445
0.35	0.0035	0.001	0.119214	0.114652	0.004562	0	-1.04982	-5.65499	-6.90776	1	-2.12684	0.0142119	-2.16586	0.0390188	0.00465158
0.35	0.0035	0.000875	0.107045	0.108136	-0.00109124	0	-1.04982	-5.65499	-7.04129	1	-2.23451	0.0114586	-2.22436	-0.0101426	-0.00108572
0.35	0.0035	0.000777778	0.0970024	0.102697	-0.00569482	0	-1.04982	-5.65499	-7.15907	1	-2.33302	0.00940946	-2.27597	-0.0570494	-0.00553392
0.35	0.0035	0.0007	0.0850684	0.098064	-0.0129956	0	-1.04982	-5.65499	-7.26443	1	-2.4643	0.00723663	-2.32213	-0.142165	-0.0120938
0.35	0.0035	0.000636364	0.0715515	0.0940531	-0.0225016	0	-1.04982	-5.65499	-7.35974	1	-2.63734	0.00511962	-2.3639	-0.273442	-0.0195652
0.35	0.0035	0.000583333	0.0636025	0.0905349	-0.0269324	0	-1.04982	-5.65499	-7.44675	1	-2.7551	0.00404527	-2.40202	-0.353083	-0.0224569
0.35	0.0035	0.000538462	0.0535372	0.0874147	-0.0338775	0	-1.04982	-5.65499	-7.52679	1	-2.92738	0.00286623	-2.43709	-0.490286	-0.0262486
0.35	0.0035	0.0005	0.0528634	0.0846219	-0.0317585	0	-1.04982	-5.65499	-7.6009	1	-2.94004	0.00279453	-2.46956	-0.470482	-0.0248713
0.35	0.0035	0.000466667	0.0492	0.082102	-0.032902	0	-1.04982	-5.65499	-7.6699	1	-3.01186	0.00242064	-2.49979	-0.512069	-0.0251938
0.35	0.0035	0.0004375	0.0473744	0.0798129	-0.0324385	0	-1.04982	-5.65499	-7.73443	1	-3.04967	0.00224434	-2.52807	-0.521602	-0.0247106
0.35	0.0035	0.000411765	0.0486925	0.0777207	-0.0290282	0	-1.04982	-5.65499	-7.79506	1	-3.02223	0.00237096	-2.55463	-0.467596	-0.0227684
0.35	0.0035	0.000388889	0.0489504	0.0757984	-0.0268481	0	-1.04982	-5.65499	-7.85222	1	-3.01695	0.00239614	-2.57968	-0.437271	-0.0214046
0.35	0.0035	0.000368421	0.0404191	0.0740239	-0.0336048	0	-1.04982	-5.65499	-7.90628	1	-3.20845	0.0016337	-2.60337	-0.605085	-0.024457
0.35	0.0035	0.00035	0.0348781	0.0723788	-0.0375006	0	-1.04982	-5.65499	-7.95758	1	-3.35589	0.00121648	-2.62584	-0.730053	-0.0254629
0.35	0.0035	0.000333333	0.0438765	0.0708479	-0.0269714	0	-1.04982	-5.65499	-8.00637	1	-3.12638	0.00192514	-2.64722	-0.479157	-0.0210237
0.35	0.0035	0.000318182	0.0376396	0.0694184	-0.0317788	0	-1.04982	-5.65499	-8.05289	1	-3.2797	0.00141674	-2.6676	-0.612096	-0.023039
0.35	0.0035	0.000304348	0.0417063	0.0680794	-0.0263731	0	-1.04982	-5.65499	-8.09734	1	-3.1771	0.00173942	-2.68708	-0.490022	-0.020437
0.35	0.0035	0.000291667	0.0407967	0.0668217	-0.026025	0	-1.04982	-5.65499	-8.1399	1	-3.19915	0.00166437	-2.70573	-0.493426	-0.0201302
0.5	0.005	0.0025	0.324023	0.310656	0.0133661	0	-0.693147	-5.29832	-5.99146	1	-1.12694	0.104991	-1.16907	0.0421255	0.0136496
0.5	0.005	0.002	0.311626	0.281721	0.0299051	0	-0.693147	-5.29832	-6.21461	1	-1.16595	0.0971106	-1.26684	0.100887	0.031439
0.5	0.005	0.00166667	0.291538	0.260091	0.0314476	0	-0.693147	-5.29832	-6.39693	1	-1.23258	0.0849945	-1.34673	0.114141	0.0332764
0.5	0.005	0.00142857	0.247332	0.243104	0.00422813	0	-0.693147	-5.29832	-6.55108	1	-1.39702	0.061173	-1.41427	0.0172428	0.00426469
0.5	0.005	0.00125	0.227744	0.229288	-0.0015441	0	-0.693147	-5.29832	-6.68461	1	-1.47953	0.0518674	-1.47278	-0.00675709	-0.00153889
0.5	0.005	0.00111111	0.214447	0.217755	-0.00330884	0	-0.693147	-5.29832	-6.80239	1	-1.53969	0.0459873	-1.52438	-0.0153118	-0.00328357
0.5	0.005	0.001	0.206055	0.207931	-0.00187653	0	-0.693147	-5.29832	-6.90776	1	-1.57961	0.0424586	-1.57055	-0.00906573	-0.00186804
0.5	0.005	0.000909091	0.201053	0.199427	0.00162579	0	-0.693147	-5.29832	-7.00307	1	-1.60419	0.0404221	-1.61231	0.00811929	0.0016324
0.5	0.005	0.000833333	0.192289	0.191967	0.000322267	0	-0.693147	-5.29832	-7.09008	1	-1.64876	0.0369751	-1.65043	0.00167736	0.000322537
0.5	0.005	0.000769231	0.167579	0.185351	-0.0177724	0	-0.693147	-5.29832	-7.17012	1	-1.7863	0.0280826	-1.6855	-0.100799	-0.0168917
0.5	0.005	0.000714286	0.165319	0.179429	-0.0141104	0	-0.693147	-5.29832	-7.24423	1	-1.79988	0.0273303	-1.71797	-0.0819049	-0.0135404
0.5	0.005	0.000666667	0.162287	0.174086	-0.0117997	0	-0.693147	-5.29832	-7.31322	1	-1.81839	0.0263369	-1.7482	-0.0701873	-0.0113904
0.5	0.005	0.000625	0.167115	0.169232	-0.00211733	0	-0.693147	-5.29832	-7.37776	1	-1.78907	0.0279274	-1.77648	-0.0125903	-0.00210403
0.5	0.005	0.000588235	0.170113	0.164796	0.00531707	0	-0.693147	-5.29832	-7.43838	1	-1.77129	0.0289385	-1.80305	0.031755	0.00540194
0.5	0.005	0.000555556	0.160167	0.16072	-0.000553711	0	-0.693147	-5.29832	-7.49554	1	-1.83154	0.0256533	-1.82809	-0.00345113	-0.000552756
0.5	0.005	0.000526316	0.166465	0.156958	0.00950758	0	-0.693147	-5.29832	-7.54961	1	-1.79297	0.0277106	-1.85178	0.0588105	0.00978989
0.5	0.005	0.0005	0.159919	0.153469	0.00644937	0	-0.693147	-5.29832	-7.6009	1	-1.83309	0.025574	-1.87425	0.0411648	0.00658302
0.5	0.005	0.00047619	0.158211	0.150223	0.00798771	0	-0.693147	-5.29832	-7.64969	1	-1.84383	0.0250307	-1.89563	0.0518068	0.0081964
0.5	0.005	0.000454545	0.154554	0.147192	0.00736206	0	-0.693147	-5.29832	-7.69621	1	-1.86721	0.023887	-1.91602	0.048806	0.00754318
0.5	0.005	0.000434783	0.150757	0.144353	0.00640367	0	-0.693147	-5.29832	-7.74066	1	-1.89209	0.0227276	-1.93549	0.0434053	0.00654365
0.5	0.005	0.000416667	0.142757	0.141686	0.00107026	0	-0.693147	-5.29832	-7.78322	1	-1.94661	0.0203794	-1.95414	0.00752534	0.00107429
0.7	0.007	0.0035	0.559762	0.631251	-0.0714896	0	-0.356675	-4.96185	-5.65499	1	-0.580244	0.313333	-0.460051	-0.120193	-0.0672794
0.7	0.007	0.0028	0.545885	0.572454	-0.0265691	0	-0.356675	-4.96185	-5.87814	1	-0.605348	0.29799	-0.557823	-0.0475242	-0.0259428
0.7	0.007	0.00233333	0.509825	0.528502	-0.0186767	0	-0.356675	-4.96185	-6.06046	1	-0.673687	0.259922	-0.637709	-0.0359785	-0.0183427
0.7	0.007	0.002	0.478473	0.493984	-0.0155116	0	-0.356675	-4.96185	-6.21461	1	-0.737156	0.228936	-0.705251	-0.0319046	-0.0152655
0.7	0.007	0.00175	0.449424	0.465912	-0.0164881	0	-0.356675	-4.96185	-6.34814	1	-0.799789	0.201982	-0.763759	-0.0360303	-0.0161929
0.7	0.007	0.00155556	0.433138	0.442477	-0.00933886	0	-0.356675	-4.96185	-6.46592	1	-0.836698	0.187609	-0.815366	-0.0213318	-0.00923961
0.7	0.007	0.0014	0.420349	0.422515	-0.00216581	0	-0.356675	-4.96185	-6.57128	1	-0.86667	0.176693	-0.861531	-0.00513918	-0.00216025
0.7	0.007	0.00127273	0.405909	0.405234	0.000675115	0	-0.356675	-4.96185	-6.66659	1	-0.901627	0.164762	-0.903292	0.0016646	0.000675678
0.7	0.007	0.00116667	0.400416	0.390075	0.0103409	0	-0.356675	-4.96185	-6.7536	1	-0.915252	0.160333	-0.941416	0.0261648	0.0104768
0.7	0.007	0.00107692	0.397765	0.376632	0.021133	0	-0.356675	-4.96185	-6.83365	1	-0.921895	0.158217	-0.976488	0.0545928	0.0217151
0.7	0.007	0.001	0.391737	0.364598	0.0271387	0	-0.356675	-4.96185	-6.90776	1	-0.937164	0.153458	-1.00896	0.0717945	0.0281246
0.7	0.007	0.000933333	0.381888	0.353742	0.0281463	0	-0.356675	-4.96185	-6.97675	1	-0.962628	0.145838	-1.03919	0.0765603	0.0292374
0.7	0.007	0.000875	0.368724	0.343879	0.0248454	0	-0.356675	-4.96185	-7.04129	1	-0.997707	0.135957	-1.06747	0.0697597	0.0257221
0.7	0.007	0.000823529	0.352356	0.334864	0.0174917	0	-0.356675	-4.96185	-7.10191	1	-1.04311	0.124155	-1.09403	0.0509165	0.0179407
0.7	0.007	0.000777778	0.346834	0.326582	0.0202518	0	-0.356675	-4.96185	-7.15907	1	-1.05891	0.120294	-1.11907	0.0601646	0.0208671
0.7	0.007	0.000736842	0.337222	0.318936	0.0182859	0	-0.356675	-4.96185	-7.21314	1	-1.08701	0.113719	-1.14276	0.0557506	0.0188004
0.7	0.007	0.0007	0.318539	0.311848	0.00669019	0	-0.356675	-4.96185	-7.26443	1	-1.14401	0.101467	-1.16524	0.0212265	0.00676144
0.7	0.007	0.000666667	0.309249	0.305252	0.00399682	0	-0.356675	-4.96185	-7.31322	1	-1.17361	0.0956351	-1.18662	0.0130085	0.00402287
0.7	0.007	0.000636364	0.308837	0.299093	0.00974399	0	-0.356675	-4.96185	-7.35974	1	-1.17494	0.0953806	-1.207	0.032059	0.00990102
0.7	0.007	0.000608696	0.29434	0.293324	0.00101556	0	-0.356675	-4.96185	-7.40419	1	-1.22302	0.086636	-1.22648	0.00345627	0.00101732
0.7	0.007	0.000583333	0.283408	0.287905	-0.00449728	0	-0.356675	-4.96185	-7.44675	1	-1.26087	0.0803201	-1.24512	-0.015744	-0.00446197
0.2	0.004	0.000666667	0.0234392	0.0309844	-0.00754519	1	-1.60944	-5.52146	-7.31322	0	-3.75334	0.000549398	-3.47427	-0.279073	-0.00654127
0.2	0.00363636	0.000666667	0.0219941	0.0299594	-0.0079653	1	-1.60944	-5.61677	-7.31322	0	-3.81698	0.000483739	-3.50791	-0.309069	-0.00679769
0.2	0.00333333	0.000666667	0.0229548	0.0290532	-0.0060984	1	-1.60944	-5.70378	-7.31322	0	-3.77423	0.000526923	-3.53863	-0.235602	-0.00540819
0.2	0.00307692	0.000666667	0.0158921	0.0282438	-0.0123517	1	-1.60944	-5.78383	-7.31322	0	-4.14193	0.00025256	-3.56688	-0.575051	-0.00913878
0.2	0.00285714	0.000666667	0.0135894	0.0275146	-0.0139252	1	-1.60944	-5.85793	-7.31322	0	-4.29847	0.000184671	-3.59304	-0.705429	-0.00958633
0.2	0.00266667	0.000666667	0.0168447	0.0268526	-0.0100079	1	-1.60944	-5.92693	-7.31322	0	-4.08372	0.000283744	-3.61739	-0.466327	-0.00785514
0.2	0.0025	0.000666667	0.01426	0.0262478	-0.0119878	1	-1.60944	-5.99146	-7.31322	0	-4.25029	0.000203349	-3.64017	-0.610122	-0.00870035
0.2	0.00235294	0.000666667	0.0213216	0.0256921	-0.00437045	1	-1.60944	-6.05209	-7.31322	0	-3.84803	0.000454612	-3.66157	-0.186461	-0.00397565
0.2	0.00222222	0.000666667	0.0152986	0.0251789	-0.00988032	1	-1.60944	-6.10925	-7.31322	0	-4.17999	0.000234047	-3.68175	-0.498246	-0.00762246
0.2	0.00210526	0.000666667	0.0158685	0.0247029	-0.00883444	1	-1.60944	-6.16331	-7.31322	0	-4.14342	0.000251809	-3.70083	-0.442586	-0.00702318
0.2	0.002	0.000666667	0.0129944	0.0242597	-0.0112653	1	-1.60944	-6.21461	-7.31322	0	-4.34323	0.000168855	-3.71894	-0.624296	-0.00811237
0.2	0.00190476	0.000666667	0.01898	0.0238455	-0.00486545	1	-1.60944	-6.2634	-7.31322	0	-3.96437	0.000360242	-3.73616	-0.228207	-0.00433138
0.2	0.00181818	0.000666667	0.013556	0.0234571	-0.00990109	1	-1.60944	-6.30992	-7.31322	0	-4.30092	0.000183766	-3.75258	-0.548342	-0.00743335
0.2	0.00173913	0.000666667	0.0194156	0.0230919	-0.00367634	1	-1.60944	-6.35437	-7.31322	0	-3.94168	0.000376966	-3.76827	-0.173407	-0.00336679
0.2	0.00166667	0.000666667	0.0143331	0.0227476	-0.00841456	1	-1.60944	-6.39693	-7.31322	0	-4.24519	0.000205437	-3.78329	-0.461892	-0.00662032
0.2	0.0016	0.000666667	0.0159978	0.0224222	-0.0064244	1	-1.60944	-6.43775	-7.31322	0	-4.1353	0.00025593	-3.7977	-0.3376	-0.00540086
0.2	0.00153846	0.000666667	0.020576	0.0221139	-0.00153788	1	-1.60944	-6.47697	-7.31322	0	-3.88363	0.000423373	-3.81155	-0.0720802	-0.00148312
0.2	0.00148148	0.000666667	0.0172862	0.0218213	-0.00453504	1	-1.60944	-6.51471	-7.31322	0	-4.05784	0.000298814	-3.82487	-0.232975	-0.00402726
0.2	0.00142857	0.000666667	0.0188263	0.0215429	-0.00271668	1	-1.60944	-6.55108	-7.31322	0	-3.9725	0.000354428	-3.83771	-0.134795	-0.00253769
0.2	0.00137931	0.000666667	0.0245816	0.0212777	0.00330385	1	-1.60944	-6.58617	-7.31322	0	-3.70576	0.000604255	-3.85009	0.144336	0.00354802
0.2	0.00133333	0.000666667	0.024369	0.0210246	0.00334436	1	-1.60944	-6.62007	-7.31322	0	-3.71444	0.000593848	-3.86206	0.147617	0.00359727
0.35	0.007	0.00116667	0.0981835	0.100757	-0.00257336	1	-1.04982	-4.96185	-6.7536	0	-2.32092	0.00964	-2.29504	-0.0258721	-0.00254022
0.35	0.00636364	0.00116667	0.0973752	0.0974235	-4.82805e-05	1	-1.04982	-5.05716	-6.7536	0	-2.32918	0.00948194	-2.32869	-0.000495697	-4.82686e-05
0.35	0.00583333	0.00116667	0.096968	0.0944768	0.00249122	1	-1.04982	-5.14417	-6.7536	0	-2.33337	0.0094028	-2.3594	0.0260269	0.00252378
0.35	0.00538462	0.00116667	0.096277	0.0918449	0.00443215	1	-1.04982	-5.22421	-6.7536	0	-2.34053	0.00926926	-2.38765	0.0471287	0.00453741
0.35	0.005	0.00116667	0.0939497	0.0894735	0.00447628	1	-1.04982	-5.29832	-6.7536	0	-2.365	0.00882655	-2.41381	0.0488179	0.00458643
0.35	0.00466667	0.00116667	0.0922609	0.0873208	0.00494011	1	-1.04982	-5.36731	-6.7536	0	-2.38313	0.00851208	-2.43817	0.0550319	0.00507729
0.35	0.004375	0.00116667	0.0886155	0.0853541	0.00326145	1	-1.04982	-5.43185	-6.7536	0	-2.42345	0.00785271	-2.46095	0.0374988	0.00332298
0.35	0.00411765	0.00116667	0.0863437	0.0835469	0.00279671	1	-1.04982	-5.49247	-6.7536	0	-2.44942	0.00745523	-2.48235	0.0329267	0.00284301
0.35	0.00388889	0.00116667	0.083599	0.0818782	0.00172081	1	-1.04982	-5.54963	-6.7536	0	-2.48172	0.0069888	-2.50252	0.0207989	0.00173877
0.35	0.00368421	0.00116667	0.0814546	0.0803304	0.00112422	1	-1.04982	-5.6037	-6.7536	0	-2.50771	0.00663486	-2.52161	0.013898	0.00113205
0.35	0.0035	0.00116667	0.0782398	0.0788891	-0.000649304	1	-1.04982	-5.65499	-6.7536	0	-2.54798	0.00612146	-2.53971	-0.00826465	-0.000646624
0.35	0.00333333	0.00116667	0.0760348	0.0775421	-0.00150731	1	-1.04982	-5.70378	-6.7536	0	-2.57656	0.00578128	-2.55693	-0.01963	-0.00149256
0.35	0.00318182	0.00116667	0.0706513	0.0762792	-0.00562788	1	-1.04982	-5.7503	-6.7536	0	-2.65	0.00499161	-2.57336	-0.0766435	-0.00541496
0.35	0.00304348	0.00116667	0.0686254	0.0750916	-0.00646621	1	-1.04982	-5.79475	-6.7536	0	-2.67909	0.00470945	-2.58905	-0.090046	-0.00617945
0.35	0.00291667	0.00116667	0.067059	0.073972	-0.00691298	1	-1.04982	-5.83731	-6.7536	0	-2.70218	0.00449691	-2.60407	-0.0981136	-0.0065794
0.35	0.0028	0.00116667	0.0647192	0.0729137	-0.00819454	1	-1.04982	-5.87814	-6.7536	0	-2.7377	0.00418857	-2.61848	-0.119219	-0.00771577
0.35	0.00269231	0.00116667	0.0617666	0.0719113	-0.0101447	1	-1.04982	-5.91736	-6.7536	0	-2.78439	0.00381511	-2.63232	-0.15207	-0.00939286
0.35	0.00259259	0.00116667	0.0593671	0.0709596	-0.0115926	1	-1.04982	-5.9551	-6.7536	0	-2.82402	0.00352445	-2.64564	-0.178372	-0.0105894
0.35	0.0025	0.00116667	0.0579248	0.0700546	-0.0121297	1	-1.04982	-5.99146	-6.7536	0	-2.84861	0.00335529	-2.65848	-0.190128	-0.0110131
0.35	0.00241379	0.00116667	0.0579825	0.0691922	-0.0112097	1	-1.04982	-6.02656	-6.7536	0	-2.84761	0.00336197	-2.67087	-0.176746	-0.0102482
0.35	0.00233333	0.00116667	0.0572388	0.0683691	-0.0111303	1	-1.04982	-6.06046	-6.7536	0	-2.86052	0.00327628	-2.68283	-0.177689	-0.0101707
0.5	0.01	0.00166667	0.194565	0.213641	-0.019076	1	-0.693147	-4.60517	-6.39693	0	-1.63699	0.0378556	-1.54346	-0.0935305	-0.0181978
0.5	0.00909091	0.00166667	0.193546	0.206573	-0.013027	1	-0.693147	-4.70048	-6.39693	0	-1.64224	0.0374602	-1.5771	-0.0651384	-0.0126073
0.5	0.00833333	0.00166667	0.193648	0.200325	-0.00667769	1	-0.693147	-4.78749	-6.39693	0	-1.64172	0.0374994	-1.60781	-0.0339025	-0.00656513
0.5	0.00769231	0.00166667	0.188328	0.194744	-0.00641658	1	-0.693147	-4.86753	-6.39693	0	-1.66957	0.0354674	-1.63607	-0.0335038	-0.00630969
0.5	0.00714286	0.00166667	0.182878	0.189716	-0.00683778	1	-0.693147	-4.94164	-6.39693	0	-1.69893	0.0334445	-1.66223	-0.0367077	-0.00671305
0.5	0.00666667	0.00166667	0.178918	0.185152	-0.00623398	1	-0.693147	-5.01064	-6.39693	0	-1.72083	0.0320116	-1.68658	-0.0342494	-0.00612783
0.5	0.00625	0.00166667	0.178831	0.180982	-0.0021509	1	-0.693147	-5.07517	-6.39693	0	-1.72132	0.0319804	-1.70936	-0.0119558	-0.00213807
0.5	0.00588235	0.00166667	0.182987	0.17715	0.00583751	1	-0.693147	-5.1358	-6.39693	0	-1.69834	0.0334844	-1.73076	0.0324211	0.00593265
0.5	0.00555556	0.00166667	0.175421	0.173612	0.00180976	1	-0.693147	-5.19296	-6.39693	0	-1.74056	0.0307726	-1.75093	0.0103702	0.00181916
0.5	0.00526316	0.00166667	0.175421	0.17033	0.00509134	1	-0.693147	-5.24702	-6.39693	0	-1.74057	0.0307725	-1.77002	0.029453	0.00516668
0.5	0.005	0.00166667	0.169155	0.167273	0.00188167	1	-0.693147	-5.29832	-6.39693	0	-1.77694	0.0286135	-1.78813	0.0111862	0.00189221
0.5	0.0047619	0.00166667	0.171111	0.164417	0.00669346	1	-0.693147	-5.34711	-6.39693	0	-1.76544	0.0292789	-1.80535	0.0399033	0.00682789
0.5	0.00454545	0.00166667	0.157394	0.16174	-0.00434549	1	-0.693147	-5.39363	-6.39693	0	-1.849	0.0247729	-1.82177	-0.0272347	-0.00428659
0.5	0.00434783	0.00166667	0.151424	0.159222	-0.00779809	1	-0.693147	-5.43808	-6.39693	0	-1.88767	0.0229291	-1.83746	-0.0502163	-0.00760393
0.5	0.00416667	0.00166667	0.160899	0.156848	0.00405131	1	-0.693147	-5.48064	-6.39693	0	-1.82698	0.0258884	-1.85248	0.0255017	0.00410319
0.5	0.004	0.00166667	0.151775	0.154604	-0.00282881	1	-0.693147	-5.52146	-6.39693	0	-1.88536	0.0230356	-1.86689	-0.0184667	-0.00280277
0.5	0.00384615	0.00166667	0.150078	0.152478	-0.00240029	1	-0.693147	-5.56068	-6.39693	0	-1.8966	0.0225233	-1.88073	-0.0158671	-0.00238129
0.5	0.0037037	0.00166667	0.149829	0.15046	-0.000631417	1	-0.693147	-5.59842	-6.39693	0	-1.89826	0.0224487	-1.89406	-0.0042054	-0.00063009
0.5	0.00357143	0.00166667	0.138987	0.148541	-0.00955446	1	-0.693147	-5.63479	-6.39693	0	-1.97338	0.0193173	-1.90689	-0.0664838	-0.00924037
0.5	0.00344828	0.00166667	0.127188	0.146713	-0.0195251	1	-0.693147	-5.66988	-6.39693	0	-2.06209	0.0161767	-1.91928	-0.142813	-0.018164
0.5	0.00333333	0.00166667	0.109727	0.144967	-0.0352408	1	-0.693147	-5.70378	-6.39693	0	-2.20976	0.0120399	-1.93125	-0.278517	-0.0305607
0.7	0.014	0.00233333	0.413153	0.434117	-0.0209642	1	-0.356675	-4.2687	-6.06046	0	-0.883937	0.170695	-0.834441	-0.0494965	-0.0204496
0.7	0.0127273	0.00233333	0.411064	0.419755	-0.00869153	1	-0.356675	-4.36401	-6.06046	0	-0.889007	0.168973	-0.868084	-0.0209236	-0.00860091
0.7	0.0116667	0.00233333	0.392723	0.407059	-0.0143366	1	-0.356675	-4.45102	-6.06046	0	-0.934652	0.154231	-0.898797	-0.035855	-0.0140811
0.7	0.0107692	0.00233333	0.370467	0.395719	-0.025252	1	-0.356675	-4.53106	-6.06046	0	-0.99299	0.137246	-0.927051	-0.0659399	-0.0244286
0.7	0.01	0.00233333	0.37626	0.385502	-0.00924161	1	-0.356675	-4.60517	-6.06046	0	-0.977474	0.141572	-0.953209	-0.0242649	-0.00912994
0.7	0.00933333	0.00233333	0.37298	0.376227	-0.00324677	1	-0.356675	-4.67416	-6.06046	0	-0.98623	0.139114	-0.977562	-0.00866727	-0.00323272
0.7	0.00875	0.00233333	0.363891	0.367753	-0.00386214	1	-0.356675	-4.7387	-6.06046	0	-1.0109	0.132417	-1.00034	-0.0105575	-0.00384179
0.7	0.00823529	0.00233333	0.343637	0.359967	-0.0163299	1	-0.356675	-4.79933	-6.06046	0	-1.06817	0.118087	-1.02174	-0.0464261	-0.0159537
0.7	0.00777778	0.00233333	0.344569	0.352777	-0.00820865	1	-0.356675	-4.85648	-6.06046	0	-1.06546	0.118728	-1.04192	-0.0235436	-0.0081124
0.7	0.00736842	0.00233333	0.333061	0.346108	-0.013047	1	-0.356675	-4.91055	-6.06046	0	-1.09943	0.11093	-1.061	-0.0384252	-0.012798
0.7	0.007	0.00233333	0.316566	0.339898	-0.0233321	1	-0.356675	-4.96185	-6.06046	0	-1.15022	0.100214	-1.07911	-0.071114	-0.0225123
0.7	0.00666667	0.00233333	0.322234	0.334095	-0.0118604	1	-0.356675	-5.01064	-6.06046	0	-1.13248	0.103835	-1.09633	-0.0361457	-0.0116474
0.7	0.00636364	0.00233333	0.298566	0.328653	-0.0300878	1	-0.356675	-5.05716	-6.06046	0	-1.20877	0.0891414	-1.11275	-0.096014	-0.0286665
0.7	0.00608696	0.00233333	0.2976	0.323537	-0.0259372	1	-0.356675	-5.10161	-6.06046	0	-1.21201	0.0885656	-1.12844	-0.0835637	-0.0248685
0.7	0.00583333	0.00233333	0.302019	0.318713	-0.0166942	1	-0.356675	-5.14417	-6.06046	0	-1.19727	0.0912152	-1.14346	-0.0538018	-0.0162491
0.7	0.0056	0.00233333	0.302085	0.314153	-0.0120688	1	-0.356675	-5.18499	-6.06046	0	-1.19705	0.0912551	-1.15787	-0.0391742	-0.0118339
0.7	0.00538462	0.00233333	0.28883	0.309834	-0.0210043	1	-0.356675	-5.22421	-6.06046	0	-1.24192	0.0834227	-1.17172	-0.0701993	-0.0202757
0.7	0.00518519	0.00233333	0.269567	0.305734	-0.0361667	1	-0.356675	-5.26195	-6.06046	0	-1.31094	0.0726665	-1.18504	-0.125898	-0.0339379
0.7	0.005	0.00233333	0.265516	0.301834	-0.0363185	1	-0.356675	-5.29832	-6.06046	0	-1.32608	0.0704987	-1.19788	-0.128204	-0.0340401
0.7	0.00482759	0.00233333	0.253977	0.298119	-0.0441413	1	-0.356675	-5.33341	-6.06046	0	-1.37051	0.0645045	-1.21026	-0.160246	-0.040699
0.7	0.00466667	0.00233333	0.246248	0.294572	-0.0483247	1	-0.356675	-5.36731	-6.06046	0	-1.40142	0.060638	-1.22223	-0.179187	-0.0441244

## Sheet: Figure 4B
[LLA]0	[I]0	[cat]0	coLLAplex	I1	I2	-d[LLA]/dt	W	y	y^	-d[LLA]/dt^	res	wres			Parameters		errors			Statistics
0.2	0.002	0.001	0.00141421	1	0	0.0347143	0.00120508	4.81002	4.75775	0.0329466	0.00176768	0.00181428		ln k1	4.75775	+/-	0.00767342		N	199
0.22	0.0022	0.0011	0.00155563	1	0	0.0397377	0.00157908	4.75454	4.75775	0.0398654	-0.000127723	-0.000127518		ln k2	5.25152	+/-	0.00868977		SSWR	0.0658095
0.24	0.0024	0.0012	0.00169706	1	0	0.0428996	0.00184038	4.65708	4.75775	0.0474431	-0.00454353	-0.00431867							se	0.0182773
0.26	0.0026	0.0013	0.00183848	1	0	0.050412	0.00254137	4.65837	4.75775	0.0556798	-0.00526778	-0.00501033		k1 (M&I sweeps)	116.484	×/÷	1.0077		RMSE	0.0201704
0.28	0.0028	0.0014	0.0019799	1	0	0.059398	0.00352813	4.67418	4.75775	0.0645754	-0.00517734	-0.00496401		k2 (cat sweep)	190.856	×/÷	1.00873
0.3	0.003	0.0015	0.00212132	1	0	0.0654577	0.0042847	4.63334	4.75775	0.0741299	-0.00867224	-0.00814394
0.32	0.0032	0.0016	0.00226274	1	0	0.0755338	0.00570535	4.64744	4.75775	0.0843433	-0.00880958	-0.00833259
0.34	0.0034	0.0017	0.00240416	1	0	0.088143	0.00776919	4.68057	4.75775	0.0952157	-0.00707271	-0.00680326
0.36	0.0036	0.0018	0.00254558	1	0	0.103613	0.0107356	4.72795	4.75775	0.106747	-0.00313406	-0.00308759		XTWX			XTWY
0.38	0.0038	0.0019	0.00268701	1	0	0.11287	0.0127396	4.70539	4.75775	0.118937	-0.00606728	-0.00590983		5.67341	0		26.9927
0.4	0.004	0.002	0.00282843	1	0	0.1267	0.016053	4.7184	4.75775	0.131786	-0.00508607	-0.00498663		0	4.4239		23.2322
0.42	0.0042	0.0021	0.00296985	1	0	0.152181	0.023159	4.80406	4.75775	0.145295	0.00688633	0.007047
0.44	0.0044	0.0022	0.00311127	1	0	0.169661	0.0287848	4.81975	4.75775	0.159462	0.0101992	0.0105187		(XTWX)-1
0.46	0.0046	0.0023	0.00325269	1	0	0.180541	0.0325952	4.79301	4.75775	0.174288	0.00625389	0.00636477		0.176261	0
0.48	0.0048	0.0024	0.00339411	1	0	0.197215	0.0388936	4.79622	4.75775	0.189773	0.00744205	0.0075861		0	0.226045
0.5	0.005	0.0025	0.00353553	1	0	0.221933	0.0492542	4.83266	4.75775	0.205916	0.0160166	0.0166239
0.52	0.0052	0.0026	0.00367696	1	0	0.242414	0.0587646	4.84249	4.75775	0.222719	0.019695	0.0205412
0.54	0.0054	0.0027	0.00381838	1	0	0.254447	0.0647431	4.81545	4.75775	0.240181	0.0142658	0.0146813
0.56	0.0056	0.0028	0.0039598	1	0	0.269709	0.0727427	4.80097	4.75775	0.258301	0.011407	0.0116553
0.58	0.0058	0.0029	0.00410122	1	0	0.287192	0.0824792	4.79359	4.75775	0.277081	0.0101109	0.0102932
0.6	0.006	0.003	0.00424264	1	0	0.305869	0.0935561	4.7888	4.75775	0.29652	0.00934985	0.00949573
0.62	0.0062	0.0031	0.00438406	1	0	0.340703	0.116079	4.83107	4.75775	0.316617	0.0240864	0.0249802
0.64	0.0064	0.0032	0.00452548	1	0	0.365009	0.133232	4.83648	4.75775	0.337373	0.0276357	0.0287379
0.66	0.0066	0.0033	0.0046669	1	0	0.374071	0.139929	4.79946	4.75775	0.358789	0.0152822	0.0156031
0.68	0.0068	0.0034	0.00480833	1	0	0.413343	0.170852	4.83959	4.75775	0.380863	0.0324796	0.0338268
0.7	0.007	0.0035	0.00494975	1	0	0.450967	0.203372	4.86873	4.75775	0.403596	0.0473714	0.0500486
0.72	0.0072	0.0036	0.00509117	1	0	0.463274	0.214623	4.83932	4.75775	0.426988	0.0362861	0.037786
0.74	0.0074	0.0037	0.00523259	1	0	0.476823	0.22736	4.81334	4.75775	0.451039	0.0257836	0.0265069
0.76	0.0076	0.0038	0.00537401	1	0	0.499516	0.249516	4.8065	4.75775	0.475749	0.0237667	0.0243507
0.78	0.0078	0.0039	0.00551543	1	0	0.521094	0.271539	4.79684	4.75775	0.501118	0.0199757	0.0203686
0.8	0.008	0.004	0.00565685	1	0	0.547077	0.299293	4.79487	4.75775	0.527146	0.0199312	0.0203033
0.2	0.002	0.001	0.00141421	0	1	0.0209744	0.000439924	4.30617	5.25152	0.0539823	-0.0330079	-0.0198282
0.2	0.002	0.0008	0.00126491	0	1	0.0193015	0.000372549	4.33462	5.25152	0.0482832	-0.0289817	-0.0176976
0.2	0.002	0.000666667	0.0011547	0	1	0.017318	0.000299912	4.31734	5.25152	0.0440764	-0.0267584	-0.0161781
0.2	0.002	0.000571429	0.00106904	0	1	0.015404	0.000237284	4.2773	5.25152	0.0408068	-0.0254027	-0.0150069
0.2	0.002	0.0005	0.001	0	1	0.0136949	0.000187551	4.22646	5.25152	0.0381712	-0.0244763	-0.0140381
0.2	0.002	0.000444444	0.000942809	0	1	0.0133879	0.000179237	4.26268	5.25152	0.0359882	-0.0226003	-0.0132385
0.2	0.002	0.0004	0.000894427	0	1	0.0134653	0.000181315	4.32113	5.25152	0.0341414	-0.0206761	-0.012528
0.2	0.002	0.000363636	0.000852803	0	1	0.0134021	0.000179616	4.36408	5.25152	0.0325525	-0.0191504	-0.0118936
0.2	0.002	0.000333333	0.000816497	0	1	0.0124348	0.000154625	4.33267	5.25152	0.0311667	-0.0187319	-0.0114257
0.2	0.002	0.000307692	0.000784465	0	1	0.0126651	0.000160405	4.39104	5.25152	0.029944	-0.0172789	-0.010898
0.2	0.002	0.000285714	0.000755929	0	1	0.01331	0.000177155	4.47776	5.25152	0.0288547	-0.0155448	-0.0102987
0.2	0.002	0.000266667	0.000730297	0	1	0.0113329	0.000128435	4.35146	5.25152	0.0278763	-0.0165434	-0.0102004
0.2	0.002	0.00025	0.000707107	0	1	0.0124328	0.000154575	4.47635	5.25152	0.0269911	-0.0145583	-0.00963754
0.2	0.002	0.000235294	0.000685994	0	1	0.0136895	0.000187403	4.60296	5.25152	0.0261853	-0.0124957	-0.00887855
0.2	0.002	0.000222222	0.000666667	0	1	0.0140942	0.000198646	4.66067	5.25152	0.0254475	-0.0113533	-0.00832761
0.2	0.002	0.000210526	0.000648886	0	1	0.0128937	0.000166248	4.59868	5.25152	0.0247688	-0.011875	-0.00841757
0.2	0.002	0.0002	0.000632456	0	1	0.0123892	0.000153493	4.58441	5.25152	0.0241416	-0.0117524	-0.00826497
0.2	0.002	0.000190476	0.000617213	0	1	0.0104541	0.000109288	4.43897	5.25152	0.0235598	-0.0131057	-0.00849445
0.2	0.002	0.000181818	0.000603023	0	1	0.0102134	0.000104314	4.43894	5.25152	0.0230181	-0.0128047	-0.00829922
0.2	0.002	0.000173913	0.000589768	0	1	0.0133115	0.000177197	4.7261	5.25152	0.0225122	-0.00920064	-0.00699421
0.2	0.002	0.000166667	0.00057735	0	1	0.0112618	0.000126828	4.58016	5.25152	0.0220382	-0.0107764	-0.00756072
0.35	0.0035	0.00175	0.00247487	0	1	0.162778	0.0264967	5.23602	5.25152	0.165321	-0.00254263	-0.00252297
0.35	0.0035	0.0014	0.00221359	0	1	0.148717	0.0221168	5.25725	5.25152	0.147867	0.000849673	0.00085211
0.35	0.0035	0.00116667	0.00202073	0	1	0.129804	0.016849	5.21239	5.25152	0.134984	-0.00518008	-0.00507939
0.35	0.0035	0.001	0.00187083	0	1	0.119214	0.0142119	5.20436	5.25152	0.124971	-0.00575689	-0.0056222
0.35	0.0035	0.000875	0.00175	0	1	0.107045	0.0114586	5.16346	5.25152	0.116899	-0.00985437	-0.00942683
0.35	0.0035	0.000777778	0.00164992	0	1	0.0970024	0.00940946	5.12383	5.25152	0.110214	-0.0132114	-0.0123859
0.35	0.0035	0.0007	0.00156525	0	1	0.0850684	0.00723663	5.04523	5.25152	0.104558	-0.0194896	-0.0175485
0.35	0.0035	0.000636364	0.00149241	0	1	0.0715515	0.00511962	4.91985	5.25152	0.0996922	-0.0281407	-0.0237315
0.35	0.0035	0.000583333	0.00142887	0	1	0.0636025	0.00404527	4.84559	5.25152	0.095448	-0.0318455	-0.0258181
0.35	0.0035	0.000538462	0.00137281	0	1	0.0535372	0.00286623	4.71334	5.25152	0.0917034	-0.0381662	-0.0288128
0.35	0.0035	0.0005	0.00132288	0	1	0.0528634	0.00279453	4.73772	5.25152	0.0883677	-0.0355043	-0.027161
0.35	0.0035	0.000466667	0.00127802	0	1	0.0492	0.00242064	4.7004	5.25152	0.0853713	-0.0361712	-0.0271149
0.35	0.0035	0.0004375	0.00123744	0	1	0.0473744	0.00224434	4.69486	5.25152	0.0826604	-0.0352859	-0.0263713
0.35	0.0035	0.000411765	0.00120049	0	1	0.0486925	0.00237096	4.75262	5.25152	0.0801923	-0.0314998	-0.0242928
0.35	0.0035	0.000388889	0.00116667	0	1	0.0489504	0.00239614	4.78648	5.25152	0.0779329	-0.0289826	-0.022764
0.35	0.0035	0.000368421	0.00113555	0	1	0.0404191	0.0016337	4.62201	5.25152	0.0758544	-0.0354353	-0.0254443
0.35	0.0035	0.00035	0.0011068	0	1	0.0348781	0.00121648	4.50021	5.25152	0.0739337	-0.0390555	-0.0262042
0.35	0.0035	0.000333333	0.00108012	0	1	0.0438765	0.00192514	4.75412	5.25152	0.0721519	-0.0282754	-0.021824
0.35	0.0035	0.000318182	0.00105529	0	1	0.0376396	0.00141674	4.62406	5.25152	0.070493	-0.0328534	-0.0236172
0.35	0.0035	0.000304348	0.00103209	0	1	0.0417063	0.00173942	4.74889	5.25152	0.0689435	-0.0272372	-0.020963
0.35	0.0035	0.000291667	0.00101036	0	1	0.0407967	0.00166437	4.74811	5.25152	0.0674919	-0.0266952	-0.0205373
0.5	0.005	0.0025	0.00353553	0	1	0.324023	0.104991	5.2111	5.25152	0.337389	-0.0133668	-0.0130984
0.5	0.005	0.002	0.00316228	0	1	0.311626	0.0971106	5.28366	5.25152	0.30177	0.00985553	0.0100147
0.5	0.005	0.00166667	0.00288675	0	1	0.291538	0.0849945	5.30819	5.25152	0.275477	0.016061	0.0165203
0.5	0.005	0.00142857	0.00267261	0	1	0.247332	0.061173	5.22082	5.25152	0.255042	-0.00771057	-0.00759282
0.5	0.005	0.00125	0.0025	0	1	0.227744	0.0518674	5.20508	5.25152	0.23857	-0.0108261	-0.0105766
0.5	0.005	0.00111111	0.00235702	0	1	0.214447	0.0459873	5.20381	5.25152	0.224926	-0.0104796	-0.0102316
0.5	0.005	0.001	0.00223607	0	1	0.206055	0.0424586	5.21657	5.25152	0.213384	-0.00732888	-0.00720155
0.5	0.005	0.000909091	0.00213201	0	1	0.201053	0.0404221	5.23965	5.25152	0.203453	-0.0024008	-0.00238658
0.5	0.005	0.000833333	0.00204124	0	1	0.192289	0.0369751	5.23859	5.25152	0.194792	-0.0025027	-0.00248656
0.5	0.005	0.000769231	0.00196116	0	1	0.167579	0.0280826	5.14106	5.25152	0.18715	-0.0195713	-0.0185103
0.5	0.005	0.000714286	0.00188982	0	1	0.165319	0.0273303	5.16454	5.25152	0.180342	-0.0150234	-0.0143795
0.5	0.005	0.000666667	0.00182574	0	1	0.162287	0.0263369	5.18052	5.25152	0.174227	-0.0119406	-0.0115217
0.5	0.005	0.000625	0.00176777	0	1	0.167115	0.0279274	5.24211	5.25152	0.168695	-0.00157964	-0.00157222
0.5	0.005	0.000588235	0.00171499	0	1	0.170113	0.0289385	5.29021	5.25152	0.163658	0.00645541	0.00658109
0.5	0.005	0.000555556	0.00166667	0	1	0.160167	0.0256533	5.25854	5.25152	0.159047	0.00111967	0.0011236
0.5	0.005	0.000526316	0.00162221	0	1	0.166465	0.0277106	5.32414	5.25152	0.154805	0.0116603	0.0120888
0.5	0.005	0.0005	0.00158114	0	1	0.159919	0.025574	5.30967	5.25152	0.150885	0.0090336	0.00929878
0.5	0.005	0.00047619	0.00154303	0	1	0.158211	0.0250307	5.32333	5.25152	0.147249	0.0109622	0.0113605
0.5	0.005	0.000454545	0.00150756	0	1	0.154554	0.023887	5.3232	5.25152	0.143863	0.0106911	0.0110788
0.5	0.005	0.000434783	0.00147442	0	1	0.150757	0.0227276	5.32055	5.25152	0.140701	0.0100558	0.0104069
0.5	0.005	0.000416667	0.00144338	0	1	0.142757	0.0203794	5.2873	5.25152	0.137739	0.00501791	0.00510822
0.7	0.007	0.0035	0.00494975	0	1	0.559762	0.313333	5.08485	5.25152	0.661283	-0.101521	-0.093296
0.7	0.007	0.0028	0.00442719	0	1	0.545885	0.29799	5.17132	5.25152	0.591469	-0.0455849	-0.0437813
0.7	0.007	0.00233333	0.00404145	0	1	0.509825	0.259922	5.19414	5.25152	0.539935	-0.0301101	-0.0292545
0.7	0.007	0.002	0.00374166	0	1	0.478473	0.228936	5.20775	5.25152	0.499883	-0.0214101	-0.0209449
0.7	0.007	0.00175	0.0035	0	1	0.449424	0.201982	5.21188	5.25152	0.467598	-0.018174	-0.0178161
0.7	0.007	0.00155556	0.00329983	0	1	0.433138	0.187609	5.23386	5.25152	0.440855	-0.00771702	-0.00764908
0.7	0.007	0.0014	0.0031305	0	1	0.420349	0.176693	5.25657	5.25152	0.418232	0.00211687	0.00212222
0.7	0.007	0.00127273	0.00298481	0	1	0.405909	0.164762	5.26927	5.25152	0.398769	0.00714001	0.00720356
0.7	0.007	0.00116667	0.00285774	0	1	0.400416	0.160333	5.29915	5.25152	0.381792	0.018624	0.019071
0.7	0.007	0.00107692	0.00274563	0	1	0.397765	0.158217	5.33253	5.25152	0.366814	0.0309508	0.0322213
0.7	0.007	0.001	0.00264575	0	1	0.391737	0.153458	5.35431	5.25152	0.353471	0.0382665	0.0402669
0.7	0.007	0.000933333	0.00255604	0	1	0.381888	0.145838	5.36334	5.25152	0.341485	0.0404029	0.0427039
0.7	0.007	0.000875	0.00247487	0	1	0.368724	0.135957	5.36053	5.25152	0.330641	0.0380826	0.0401961
0.7	0.007	0.000823529	0.00240098	0	1	0.352356	0.124155	5.34544	5.25152	0.320769	0.0315867	0.0330933
0.7	0.007	0.000777778	0.00233333	0	1	0.346834	0.120294	5.35822	5.25152	0.311732	0.0351021	0.0370082
0.7	0.007	0.000736842	0.0022711	0	1	0.337222	0.113719	5.35715	5.25152	0.303417	0.0338048	0.0356216
0.7	0.007	0.0007	0.00221359	0	1	0.318539	0.101467	5.3258	5.25152	0.295735	0.0228038	0.0236612
0.7	0.007	0.000666667	0.00216025	0	1	0.309249	0.0956351	5.3206	5.25152	0.288608	0.0206417	0.0213629
0.7	0.007	0.000636364	0.00211058	0	1	0.308837	0.0953806	5.34253	5.25152	0.281972	0.0268654	0.0281064
0.7	0.007	0.000608696	0.00206419	0	1	0.29434	0.086636	5.31667	5.25152	0.275774	0.0185659	0.0191773
0.7	0.007	0.000583333	0.00202073	0	1	0.283408	0.0803201	5.30011	5.25152	0.269968	0.0134403	0.0137695
0.2	0.004	0.000666667	0.00163299	1	0	0.0234392	0.000549398	4.27343	4.75775	0.0380435	-0.0146042	-0.0113521
0.2	0.00363636	0.000666667	0.001557	1	0	0.0219941	0.000483739	4.25745	4.75775	0.036273	-0.014279	-0.0110037
0.2	0.00333333	0.000666667	0.00149071	1	0	0.0229548	0.000526923	4.34371	4.75775	0.0347288	-0.011774	-0.00950425
0.2	0.00307692	0.000666667	0.00143223	1	0	0.0158921	0.00025256	4.01603	4.75775	0.0333663	-0.0174742	-0.0117876
0.2	0.00285714	0.000666667	0.00138013	1	0	0.0135894	0.000184671	3.89655	4.75775	0.0321526	-0.0185632	-0.0117032
0.2	0.00266667	0.000666667	0.00133333	1	0	0.0168447	0.000283744	4.14579	4.75775	0.0310624	-0.0142177	-0.0103083
0.2	0.0025	0.000666667	0.00129099	1	0	0.01426	0.000203349	4.01149	4.75775	0.030076	-0.015816	-0.0106418
0.2	0.00235294	0.000666667	0.00125245	1	0	0.0213216	0.000454612	4.44406	4.75775	0.029178	-0.00785638	-0.00668845
0.2	0.00222222	0.000666667	0.00121716	1	0	0.0152986	0.000234047	4.14068	4.75775	0.0283559	-0.0130573	-0.00944038
0.2	0.00210526	0.000666667	0.0011847	1	0	0.0158685	0.000251809	4.20429	4.75775	0.0275996	-0.0117311	-0.00878269
0.2	0.002	0.000666667	0.0011547	1	0	0.0129944	0.000168855	4.03012	4.75775	0.0269008	-0.0139064	-0.0094552
0.2	0.00190476	0.000666667	0.00112687	1	0	0.01898	0.000360242	4.43338	4.75775	0.0262525	-0.00727246	-0.00615662
0.2	0.00181818	0.000666667	0.00110096	1	0	0.013556	0.000183766	4.12008	4.75775	0.0256489	-0.0120929	-0.00864427
0.2	0.00173913	0.000666667	0.00107676	1	0	0.0194156	0.000376966	4.50155	4.75775	0.0250851	-0.00566953	-0.00497424
0.2	0.00166667	0.000666667	0.00105409	1	0	0.0143331	0.000205437	4.21933	4.75775	0.024557	-0.0102239	-0.0077173
0.2	0.0016	0.000666667	0.0010328	1	0	0.0159978	0.00025593	4.34962	4.75775	0.0240608	-0.00806301	-0.00652923
0.2	0.00153846	0.000666667	0.00101274	1	0	0.020576	0.000423373	4.62091	4.75775	0.0235936	-0.00301753	-0.00281577
0.2	0.00148148	0.000666667	0.000993808	1	0	0.0172862	0.000298814	4.46556	4.75775	0.0231525	-0.00586629	-0.00505092
0.2	0.00142857	0.000666667	0.0009759	1	0	0.0188263	0.000354428	4.56909	4.75775	0.0227353	-0.00390906	-0.00355189
0.2	0.00137931	0.000666667	0.000958927	1	0	0.0245816	0.000604255	4.85338	4.75775	0.0223399	0.0022417	0.00235059
0.2	0.00133333	0.000666667	0.000942809	1	0	0.024369	0.000593848	4.86164	4.75775	0.0219644	0.00240459	0.00253166
0.35	0.007	0.00116667	0.00285774	1	0	0.0981835	0.00964	4.58663	4.75775	0.116508	-0.0183246	-0.0168014
0.35	0.00636364	0.00116667	0.00272475	1	0	0.0973752	0.00948194	4.62602	4.75775	0.111086	-0.0137109	-0.0128276
0.35	0.00583333	0.00116667	0.00260875	1	0	0.096968	0.0094028	4.66533	4.75775	0.106357	-0.00938887	-0.0089617
0.35	0.00538462	0.00116667	0.0025064	1	0	0.096277	0.00926926	4.6982	4.75775	0.102184	-0.00590739	-0.00573325
0.35	0.005	0.00116667	0.00241523	1	0	0.0939497	0.00882655	4.71079	4.75775	0.0984674	-0.00451761	-0.00441236
0.35	0.00466667	0.00116667	0.00233333	1	0	0.0922609	0.00851208	4.72715	4.75775	0.0951285	-0.00286757	-0.00282391
0.35	0.004375	0.00116667	0.00225924	1	0	0.0886155	0.00785271	4.7191	4.75775	0.0921078	-0.00349227	-0.00342521
0.35	0.00411765	0.00116667	0.00219179	1	0	0.0863437	0.00745523	4.72344	4.75775	0.0893577	-0.00301401	-0.0029626
0.35	0.00388889	0.00116667	0.00213003	1	0	0.083599	0.0069888	4.71972	4.75775	0.08684	-0.00324103	-0.00317978
0.35	0.00368421	0.00116667	0.00207322	1	0	0.0814546	0.00663486	4.72076	4.75775	0.0845239	-0.00306927	-0.00301285
0.35	0.0035	0.00116667	0.00202073	1	0	0.0782398	0.00612146	4.70614	4.75775	0.0823837	-0.00414394	-0.00403793
0.35	0.00333333	0.00116667	0.00197203	1	0	0.0760348	0.00578128	4.70195	4.75775	0.0803983	-0.0043635	-0.00424289
0.35	0.00318182	0.00116667	0.00192669	1	0	0.0706513	0.00499161	4.65178	4.75775	0.0785498	-0.00789848	-0.00748735
0.35	0.00304348	0.00116667	0.00188434	1	0	0.0686254	0.00470945	4.64491	4.75775	0.0768232	-0.00819776	-0.00774393
0.35	0.00291667	0.00116667	0.00184466	1	0	0.067059	0.00449691	4.6431	4.75775	0.0752057	-0.00814668	-0.00768857
0.35	0.0028	0.00116667	0.00180739	1	0	0.0647192	0.00418857	4.62799	4.75775	0.0736862	-0.00896702	-0.00839783
0.35	0.00269231	0.00116667	0.00177229	1	0	0.0617666	0.00381511	4.60091	4.75775	0.0722553	-0.0104887	-0.00968764
0.35	0.00259259	0.00116667	0.00173916	1	0	0.0593671	0.00352445	4.58016	4.75775	0.0709046	-0.0115375	-0.0105433
0.35	0.0025	0.00116667	0.00170783	1	0	0.0579248	0.00335529	4.57375	4.75775	0.0696269	-0.0117021	-0.0106585
0.35	0.00241379	0.00116667	0.00167812	1	0	0.0579825	0.00336197	4.59229	4.75775	0.0684159	-0.0104334	-0.00959404
0.35	0.00233333	0.00116667	0.00164992	1	0	0.0572388	0.00327628	4.59633	4.75775	0.067266	-0.0100272	-0.00923964
0.5	0.01	0.00166667	0.00408248	1	0	0.194565	0.0378556	4.55721	4.75775	0.237772	-0.0432065	-0.0390188
0.5	0.00909091	0.00166667	0.00389249	1	0	0.193546	0.0374602	4.59961	4.75775	0.226706	-0.0331601	-0.0306072
0.5	0.00833333	0.00166667	0.00372678	1	0	0.193648	0.0374994	4.64364	4.75775	0.217055	-0.0234074	-0.0220973
0.5	0.00769231	0.00166667	0.00358057	1	0	0.188328	0.0354674	4.65581	4.75775	0.20854	-0.0202117	-0.0191989
0.5	0.00714286	0.00166667	0.00345033	1	0	0.182878	0.0334445	4.6635	4.75775	0.200954	-0.0180753	-0.0172368
0.5	0.00666667	0.00166667	0.00333333	1	0	0.178918	0.0320116	4.6761	4.75775	0.19414	-0.0152219	-0.0146089
0.5	0.00625	0.00166667	0.00322749	1	0	0.178831	0.0319804	4.70788	4.75775	0.187975	-0.0091443	-0.00891819
0.5	0.00588235	0.00166667	0.00313112	1	0	0.182987	0.0334844	4.76117	4.75775	0.182363	0.000624829	0.000625898
0.5	0.00555556	0.00166667	0.0030429	1	0	0.175421	0.0307726	4.74753	4.75775	0.177225	-0.00180325	-0.00179404
0.5	0.00526316	0.00166667	0.00296174	1	0	0.175421	0.0307725	4.77456	4.75775	0.172498	0.00292326	0.00294789
0.5	0.005	0.00166667	0.00288675	1	0	0.169155	0.0286135	4.76383	4.75775	0.16813	0.00102517	0.00102829
0.5	0.0047619	0.00166667	0.00281718	1	0	0.171111	0.0292789	4.79972	4.75775	0.164078	0.00703276	0.00718137
0.5	0.00454545	0.00166667	0.00275241	1	0	0.157394	0.0247729	4.73942	4.75775	0.160306	-0.00291158	-0.00288498
0.5	0.00434783	0.00166667	0.00269191	1	0	0.151424	0.0229291	4.72298	4.75775	0.156782	-0.00535853	-0.0052659
0.5	0.00416667	0.00166667	0.00263523	1	0	0.160899	0.0258884	4.80495	4.75775	0.153481	0.00741785	0.00759428
0.5	0.004	0.00166667	0.00258199	1	0	0.151775	0.0230356	4.76699	4.75775	0.15038	0.00139479	0.00140124
0.5	0.00384615	0.00166667	0.00253185	1	0	0.150078	0.0225233	4.77535	4.75775	0.14746	0.00261799	0.00264109
0.5	0.0037037	0.00166667	0.00248452	1	0	0.149829	0.0224487	4.79256	4.75775	0.144703	0.00512557	0.00521529
0.5	0.00357143	0.00166667	0.00243975	1	0	0.138987	0.0193173	4.73563	4.75775	0.142096	-0.00310912	-0.00307485
0.5	0.00344828	0.00166667	0.00239732	1	0	0.127188	0.0161767	4.66446	4.75775	0.139624	-0.0124369	-0.0118657
0.5	0.00333333	0.00166667	0.00235702	1	0	0.109727	0.0120399	4.53374	4.75775	0.137278	-0.027551	-0.0245802
0.7	0.014	0.00233333	0.00571548	1	0	0.413153	0.170695	4.63732	4.75775	0.466033	-0.0528796	-0.0497592
0.7	0.0127273	0.00233333	0.00544949	1	0	0.411064	0.168973	4.6799	4.75775	0.444345	-0.0332809	-0.0320023
0.7	0.0116667	0.00233333	0.00521749	1	0	0.392723	0.154231	4.67776	4.75775	0.425428	-0.0327051	-0.0314145
0.7	0.0107692	0.00233333	0.0050128	1	0	0.370467	0.137246	4.65944	4.75775	0.408738	-0.0382704	-0.0364201
0.7	0.01	0.00233333	0.00483046	1	0	0.37626	0.141572	4.71201	4.75775	0.393869	-0.0176092	-0.0172095
0.7	0.00933333	0.00233333	0.00466667	1	0	0.37298	0.139114	4.73776	4.75775	0.380514	-0.00753371	-0.00745863
0.7	0.00875	0.00233333	0.00451848	1	0	0.363891	0.132417	4.74535	4.75775	0.368431	-0.00454007	-0.00451198
0.7	0.00823529	0.00233333	0.00438357	1	0	0.343637	0.118087	4.7184	4.75775	0.357431	-0.0137934	-0.0135238
0.7	0.00777778	0.00233333	0.00426006	1	0	0.344569	0.118728	4.74968	4.75775	0.34736	-0.00279159	-0.00278035
0.7	0.00736842	0.00233333	0.00414644	1	0	0.333061	0.11093	4.74275	4.75775	0.338096	-0.00503417	-0.0049965
0.7	0.007	0.00233333	0.00404145	1	0	0.316566	0.100214	4.7176	4.75775	0.329535	-0.0129685	-0.0127099
0.7	0.00666667	0.00233333	0.00394405	1	0	0.322234	0.103835	4.75974	4.75775	0.321593	0.000641234	0.000641873
0.7	0.00636364	0.00233333	0.00385337	1	0	0.298566	0.0891414	4.70672	4.75775	0.314199	-0.0156335	-0.0152379
0.7	0.00608696	0.00233333	0.00376867	1	0	0.2976	0.0885656	4.7257	4.75775	0.307293	-0.00969303	-0.00953852
0.7	0.00583333	0.00233333	0.00368932	1	0	0.302019	0.0912152	4.76172	4.75775	0.300823	0.00119588	0.00119825
0.7	0.0056	0.00233333	0.00361478	1	0	0.302085	0.0912551	4.78235	4.75775	0.294745	0.00733965	0.00743029
0.7	0.00538462	0.00233333	0.00354459	1	0	0.28883	0.0834227	4.75709	4.75775	0.289021	-0.000191337	-0.000191273
0.7	0.00518519	0.00233333	0.00347833	1	0	0.269567	0.0726665	4.70694	4.75775	0.283618	-0.0140512	-0.0136972
0.7	0.005	0.00233333	0.00341565	1	0	0.265516	0.0704987	4.70998	4.75775	0.278508	-0.0129919	-0.0126841
0.7	0.00482759	0.00233333	0.00335624	1	0	0.253977	0.0645045	4.6831	4.75775	0.273664	-0.0196864	-0.0189607
0.7	0.00466667	0.00233333	0.00329983	1	0	0.246248	0.060638	4.66914	4.75775	0.269064	-0.0228163	-0.0218203

## Sheet: Figure 4C
[LLA]0	[I]0	[cat]0	-d[LLA]/dt	i=1	i=2	W	y	y^	-d[LLA]/dt^	res	wres			Parameters		errors			Statistics
0.2	0.002	0.001	0.0347143	1	0	0.00120508	8.26389	7.73141	0.0203823	0.014332	0.0184848		ln k1	7.73141	+/-	0.0229138		N	199
0.22	0.0022	0.0011	0.0397377	1	0	0.00157908	8.16077	7.73141	0.0258664	0.0138713	0.0170616		ln k2	8.57772	+/-	0.0259487		SSWR	0.586819
0.24	0.0024	0.0012	0.0428996	1	0	0.00184038	8.0198	7.73141	0.0321519	0.0107477	0.0123718							se	0.0545781
0.26	0.0026	0.0013	0.050412	1	0	0.00254137	7.98106	7.73141	0.0392747	0.0111373	0.0125853							RMSE	0.06041
0.28	0.0028	0.0014	0.059398	1	0	0.00352813	7.95982	7.73141	0.0472688	0.0121293	0.0135672		k1 (M&I sweeps)	2278.82	×/÷	1.02318
0.3	0.003	0.0015	0.0654577	1	0	0.0042847	7.88448	7.73141	0.0561671	0.00929051	0.0100197		k2 (cat sweep)	5311.97	×/÷	1.02629
0.32	0.0032	0.0016	0.0755338	1	0	0.00570535	7.86631	7.73141	0.0660015	0.00953222	0.0101896
0.34	0.0034	0.0017	0.088143	1	0	0.00776919	7.86913	7.73141	0.0768027	0.0113403	0.0121391
0.36	0.0036	0.0018	0.103613	1	0	0.0107356	7.88794	7.73141	0.0886003	0.0150126	0.0162182
0.38	0.0038	0.0019	0.11287	1	0	0.0127396	7.83834	7.73141	0.101423	0.0114466	0.0120695		XTWX			XTWY
0.4	0.004	0.002	0.1267	1	0	0.016053	7.8257	7.73141	0.1153	0.0114004	0.0119464		5.67341	0		43.8634
0.42	0.0042	0.0021	0.152181	1	0	0.023159	7.88697	7.73141	0.130257	0.0219235	0.0236729		0	4.4239		37.947
0.44	0.0044	0.0022	0.169661	1	0	0.0287848	7.8794	7.73141	0.146322	0.0233384	0.0251079
0.46	0.0046	0.0023	0.180541	1	0	0.0325952	7.83043	7.73141	0.163521	0.0170204	0.017877		(XTWX)-1
0.48	0.0048	0.0024	0.197215	1	0	0.0388936	7.81236	7.73141	0.181879	0.0153357	0.0159648		0.176261	0
0.5	0.005	0.0025	0.221933	1	0	0.0492542	7.82839	7.73141	0.201421	0.0205122	0.0215229		0	0.226045
0.52	0.0052	0.0026	0.242414	1	0	0.0587646	7.81861	7.73141	0.222171	0.020243	0.0211385
0.54	0.0054	0.0027	0.254447	1	0	0.0647431	7.7727	7.73141	0.244154	0.0102928	0.0105068
0.56	0.0056	0.0028	0.269709	1	0	0.0727427	7.74004	7.73141	0.267392	0.00231601	0.00232601
0.58	0.0058	0.0029	0.287192	1	0	0.0824792	7.71512	7.73141	0.29191	-0.00471818	-0.00467984
0.6	0.006	0.003	0.305869	1	0	0.0935561	7.69337	7.73141	0.317729	-0.0118599	-0.0116358
0.62	0.0062	0.0031	0.340703	1	0	0.116079	7.71925	7.73141	0.344872	-0.00416891	-0.00414361
0.64	0.0064	0.0032	0.365009	1	0	0.133232	7.70879	7.73141	0.373361	-0.00835205	-0.00825793
0.66	0.0066	0.0033	0.374071	1	0	0.139929	7.65638	7.73141	0.403217	-0.0291463	-0.0280666
0.68	0.0068	0.0034	0.413343	1	0	0.170852	7.68158	7.73141	0.434462	-0.0211191	-0.0205973
0.7	0.007	0.0035	0.450967	1	0	0.203372	7.69623	7.73141	0.467115	-0.0161481	-0.0158657
0.72	0.0072	0.0036	0.463274	1	0	0.214623	7.65273	7.73141	0.501199	-0.0379249	-0.0364525
0.74	0.0074	0.0037	0.476823	1	0	0.22736	7.61305	7.73141	0.536733	-0.0599104	-0.0564349
0.76	0.0076	0.0038	0.499516	1	0	0.249516	7.59288	7.73141	0.573737	-0.0742215	-0.0691991
0.78	0.0078	0.0039	0.521094	1	0	0.271539	7.57023	7.73141	0.612231	-0.0911378	-0.0839902
0.8	0.008	0.004	0.547077	1	0	0.299293	7.5556	7.73141	0.652235	-0.105158	-0.0961845
0.2	0.002	0.001	0.0209744	0	1	0.000439924	7.76004	8.57772	0.0475117	-0.0265373	-0.0171502
0.2	0.002	0.0008	0.0193015	0	1	0.000372549	7.90007	8.57772	0.0380093	-0.0187078	-0.0130796
0.2	0.002	0.000666667	0.017318	0	1	0.000299912	7.97395	8.57772	0.0316744	-0.0143565	-0.010456
0.2	0.002	0.000571429	0.015404	0	1	0.000237284	8.01099	8.57772	0.0271495	-0.0117455	-0.00872993
0.2	0.002	0.0005	0.0136949	0	1	0.000187551	8.02692	8.57772	0.0237558	-0.0100609	-0.0075432
0.2	0.002	0.000444444	0.0133879	0	1	0.000179237	8.12203	8.57772	0.0211163	-0.00772836	-0.00610076
0.2	0.002	0.0004	0.0134653	0	1	0.000181315	8.23315	8.57772	0.0190047	-0.00553933	-0.0046397
0.2	0.002	0.000363636	0.0134021	0	1	0.000179616	8.32375	8.57772	0.017277	-0.00387487	-0.00340364
0.2	0.002	0.000333333	0.0124348	0	1	0.000154625	8.33586	8.57772	0.0158372	-0.00340239	-0.0030075
0.2	0.002	0.000307692	0.0126651	0	1	0.000160405	8.43425	8.57772	0.014619	-0.00195387	-0.00181706
0.2	0.002	0.000285714	0.01331	0	1	0.000177155	8.55802	8.57772	0.0135748	-0.000264794	-0.000262194
0.2	0.002	0.000266667	0.0113329	0	1	0.000128435	8.46621	8.57772	0.0126698	-0.00133684	-0.00126369
0.2	0.002	0.00025	0.0124328	0	1	0.000154575	8.62337	8.57772	0.0118779	0.000554885	0.000567648
0.2	0.002	0.000235294	0.0136895	0	1	0.000187403	8.78029	8.57772	0.0111792	0.00251032	0.00277316
0.2	0.002	0.000222222	0.0140942	0	1	0.000198646	8.86658	8.57772	0.0105581	0.00353605	0.00407133
0.2	0.002	0.000210526	0.0128937	0	1	0.000166248	8.83163	8.57772	0.0100025	0.00289128	0.00327386
0.2	0.002	0.0002	0.0123892	0	1	0.000153493	8.84301	8.57772	0.00950233	0.0028869	0.00328675
0.2	0.002	0.000190476	0.0104541	0	1	0.000109288	8.72196	8.57772	0.00904984	0.00140426	0.00150797
0.2	0.002	0.000181818	0.0102134	0	1	0.000104314	8.74519	8.57772	0.00863848	0.00157492	0.00171047
0.2	0.002	0.000173913	0.0133115	0	1	0.000177197	9.05457	8.57772	0.0082629	0.00504864	0.00634768
0.2	0.002	0.000166667	0.0112618	0	1	0.000126828	8.92992	8.57772	0.00791861	0.00334319	0.00396641
0.35	0.0035	0.00175	0.162778	0	1	0.0264967	8.41009	8.57772	0.192484	-0.0297062	-0.0272859
0.35	0.0035	0.0014	0.148717	0	1	0.0221168	8.54289	8.57772	0.153987	-0.00527041	-0.00517917
0.35	0.0035	0.00116667	0.129804	0	1	0.016849	8.58919	8.57772	0.128323	0.00148087	0.00148938
0.35	0.0035	0.001	0.119214	0	1	0.0142119	8.65824	8.57772	0.109991	0.00922282	0.00959911
0.35	0.0035	0.000875	0.107045	0	1	0.0114586	8.6841	8.57772	0.0962422	0.0108029	0.0113877
0.35	0.0035	0.000777778	0.0970024	0	1	0.00940946	8.70337	8.57772	0.0855486	0.0114538	0.0121885
0.35	0.0035	0.0007	0.0850684	0	1	0.00723663	8.67745	8.57772	0.0769937	0.00807465	0.00848399
0.35	0.0035	0.000636364	0.0715515	0	1	0.00511962	8.59972	8.57772	0.0699943	0.0015572	0.00157439
0.35	0.0035	0.000583333	0.0636025	0	1	0.00404527	8.56897	8.57772	0.0641614	-0.00055897	-0.000556528
0.35	0.0035	0.000538462	0.0535372	0	1	0.00286623	8.47673	8.57772	0.0592259	-0.00568872	-0.00540632
0.35	0.0035	0.0005	0.0528634	0	1	0.00279453	8.53818	8.57772	0.0549955	-0.00213216	-0.00209028
0.35	0.0035	0.000466667	0.0492	0	1	0.00242064	8.53535	8.57772	0.0513291	-0.00212912	-0.00208434
0.35	0.0035	0.0004375	0.0473744	0	1	0.00224434	8.56208	8.57772	0.0481211	-0.000746653	-0.00074083
0.35	0.0035	0.000411765	0.0486925	0	1	0.00237096	8.65015	8.57772	0.0452904	0.0034021	0.00352679
0.35	0.0035	0.000388889	0.0489504	0	1	0.00239614	8.71259	8.57772	0.0427743	0.00617607	0.00660191
0.35	0.0035	0.000368421	0.0404191	0	1	0.0016337	8.57515	8.57772	0.040523	-0.000103904	-0.000103771
0.35	0.0035	0.00035	0.0348781	0	1	0.00121648	8.479	8.57772	0.0384969	-0.00361872	-0.00344305
0.35	0.0035	0.000333333	0.0438765	0	1	0.00192514	8.75731	8.57772	0.0366637	0.00721279	0.00787984
0.35	0.0035	0.000318182	0.0376396	0	1	0.00141674	8.65051	8.57772	0.0349971	0.00264244	0.00273977
0.35	0.0035	0.000304348	0.0417063	0	1	0.00173942	8.79756	8.57772	0.0334755	0.00823082	0.00916867
0.35	0.0035	0.000291667	0.0407967	0	1	0.00166437	8.81806	8.57772	0.0320807	0.00871598	0.00980532
0.5	0.005	0.0025	0.324023	0	1	0.104991	8.20683	8.57772	0.469516	-0.145493	-0.120176
0.5	0.005	0.002	0.311626	0	1	0.0971106	8.39096	8.57772	0.375613	-0.063987	-0.0581979
0.5	0.005	0.00166667	0.291538	0	1	0.0849945	8.50665	8.57772	0.313011	-0.0214724	-0.0207184
0.5	0.005	0.00142857	0.247332	0	1	0.061173	8.49636	8.57772	0.268295	-0.020963	-0.0201218
0.5	0.005	0.00125	0.227744	0	1	0.0518674	8.54739	8.57772	0.234758	-0.00701375	-0.00690791
0.5	0.005	0.00111111	0.214447	0	1	0.0459873	8.60501	8.57772	0.208674	0.00577288	0.00585201
0.5	0.005	0.001	0.206055	0	1	0.0424586	8.67045	8.57772	0.187806	0.0182485	0.0191077
0.5	0.005	0.000909091	0.201053	0	1	0.0404221	8.74118	8.57772	0.170733	0.0303196	0.0328651
0.5	0.005	0.000833333	0.192289	0	1	0.0369751	8.78363	8.57772	0.156505	0.0357838	0.0395943
0.5	0.005	0.000769231	0.167579	0	1	0.0280826	8.72612	8.57772	0.144466	0.0231122	0.0248696
0.5	0.005	0.000714286	0.165319	0	1	0.0273303	8.78665	8.57772	0.134147	0.0311714	0.0345411
0.5	0.005	0.000666667	0.162287	0	1	0.0263369	8.83713	8.57772	0.125204	0.0370823	0.0420999
0.5	0.005	0.000625	0.167115	0	1	0.0279274	8.93099	8.57772	0.117379	0.049736	0.0590375
0.5	0.005	0.000588235	0.170113	0	1	0.0289385	9.0094	8.57772	0.110474	0.0596389	0.0734347
0.5	0.005	0.000555556	0.160167	0	1	0.0256533	9.00631	8.57772	0.104337	0.0558296	0.0686456
0.5	0.005	0.000526316	0.166465	0	1	0.0277106	9.09895	8.57772	0.0988454	0.0676196	0.0867663
0.5	0.005	0.0005	0.159919	0	1	0.025574	9.11012	8.57772	0.0939032	0.0660155	0.0851409
0.5	0.005	0.00047619	0.158211	0	1	0.0250307	9.14817	8.57772	0.0894316	0.0687794	0.0902524
0.5	0.005	0.000454545	0.154554	0	1	0.023887	9.17131	8.57772	0.0853665	0.0691878	0.0917422
0.5	0.005	0.000434783	0.150757	0	1	0.0227276	9.19088	8.57772	0.0816549	0.0691019	0.092439
0.5	0.005	0.000416667	0.142757	0	1	0.0203794	9.17891	8.57772	0.0782526	0.0645039	0.0858249
0.7	0.007	0.0035	0.559762	0	1	0.313333	7.91235	8.57772	1.08886	-0.529094	-0.37245
0.7	0.007	0.0028	0.545885	0	1	0.29799	8.11039	8.57772	0.871085	-0.3252	-0.255109
0.7	0.007	0.00233333	0.509825	0	1	0.259922	8.22437	8.57772	0.725904	-0.216079	-0.180147
0.7	0.007	0.002	0.478473	0	1	0.228936	8.31505	8.57772	0.622203	-0.14373	-0.125679
0.7	0.007	0.00175	0.449424	0	1	0.201982	8.38595	8.57772	0.544428	-0.0950042	-0.0861857
0.7	0.007	0.00155556	0.433138	0	1	0.187609	8.46682	8.57772	0.483936	-0.0507976	-0.048033
0.7	0.007	0.0014	0.420349	0	1	0.176693	8.54221	8.57772	0.435542	-0.0151933	-0.0149252
0.7	0.007	0.00127273	0.405909	0	1	0.164762	8.60256	8.57772	0.395948	0.00996113	0.0100854
0.7	0.007	0.00116667	0.400416	0	1	0.160333	8.67595	8.57772	0.362952	0.037464	0.0393342
0.7	0.007	0.00107692	0.397765	0	1	0.158217	8.74935	8.57772	0.335033	0.0627321	0.0682695
0.7	0.007	0.001	0.391737	0	1	0.153458	8.80819	8.57772	0.311102	0.0806355	0.0902842
0.7	0.007	0.000933333	0.381888	0	1	0.145838	8.85172	8.57772	0.290362	0.0915264	0.104637
0.7	0.007	0.000875	0.368724	0	1	0.135957	8.88118	8.57772	0.272214	0.0965101	0.111893
0.7	0.007	0.000823529	0.352356	0	1	0.124155	8.8964	8.57772	0.256201	0.0961547	0.112288
0.7	0.007	0.000777778	0.346834	0	1	0.120294	8.93776	8.57772	0.241968	0.104866	0.124874
0.7	0.007	0.000736842	0.337222	0	1	0.113719	8.96372	8.57772	0.229233	0.107989	0.130169
0.7	0.007	0.0007	0.318539	0	1	0.101467	8.95802	8.57772	0.217771	0.100767	0.12114
0.7	0.007	0.000666667	0.309249	0	1	0.0956351	8.97721	8.57772	0.207401	0.101848	0.123543
0.7	0.007	0.000636364	0.308837	0	1	0.0953806	9.0224	8.57772	0.197974	0.110864	0.137334
0.7	0.007	0.000608696	0.29434	0	1	0.086636	9.01877	8.57772	0.189366	0.104974	0.129819
0.7	0.007	0.000583333	0.283408	0	1	0.0803201	9.02348	8.57772	0.181476	0.101932	0.126333
0.2	0.004	0.000666667	0.0234392	1	0	0.000549398	7.93004	7.73141	0.0192167	0.00422257	0.00465582
0.2	0.00363636	0.000666667	0.0219941	1	0	0.000483739	7.91406	7.73141	0.0183224	0.0036717	0.00401722
0.2	0.00333333	0.000666667	0.0229548	1	0	0.000526923	8.00032	7.73141	0.0175423	0.00541247	0.00617278
0.2	0.00307692	0.000666667	0.0158921	1	0	0.00025256	7.67264	7.73141	0.0168541	-0.000961991	-0.000933999
0.2	0.00285714	0.000666667	0.0135894	1	0	0.000184671	7.55316	7.73141	0.016241	-0.00265167	-0.00242236
0.2	0.00266667	0.000666667	0.0168447	1	0	0.000283744	7.8024	7.73141	0.0156903	0.00115436	0.00119582
0.2	0.0025	0.000666667	0.01426	1	0	0.000203349	7.6681	7.73141	0.0151921	-0.000932069	-0.000902874
0.2	0.00235294	0.000666667	0.0213216	1	0	0.000454612	8.10067	7.73141	0.0147385	0.00658313	0.0078732
0.2	0.00222222	0.000666667	0.0152986	1	0	0.000234047	7.79729	7.73141	0.0143233	0.000975348	0.00100783
0.2	0.00210526	0.000666667	0.0158685	1	0	0.000251809	7.8609	7.73141	0.0139412	0.00192727	0.00205474
0.2	0.002	0.000666667	0.0129944	1	0	0.000168855	7.68673	7.73141	0.0135882	-0.000593796	-0.000580629
0.2	0.00190476	0.000666667	0.01898	1	0	0.000360242	8.08999	7.73141	0.0132608	0.00571928	0.00680584
0.2	0.00181818	0.000666667	0.013556	1	0	0.000183766	7.77669	7.73141	0.0129559	0.000600165	0.000613856
0.2	0.00173913	0.000666667	0.0194156	1	0	0.000376966	8.15816	7.73141	0.0126711	0.00674451	0.00828568
0.2	0.00166667	0.000666667	0.0143331	1	0	0.000205437	7.87594	7.73141	0.0124043	0.00192877	0.0020715
0.2	0.0016	0.000666667	0.0159978	1	0	0.00025593	8.00623	7.73141	0.0121537	0.00384412	0.0043965
0.2	0.00153846	0.000666667	0.020576	1	0	0.000423373	8.27752	7.73141	0.0119177	0.00865837	0.0112367
0.2	0.00148148	0.000666667	0.0172862	1	0	0.000298814	8.12217	7.73141	0.0116949	0.00559135	0.00675475
0.2	0.00142857	0.000666667	0.0188263	1	0	0.000354428	8.2257	7.73141	0.0114842	0.00734212	0.00930555
0.2	0.00137931	0.000666667	0.0245816	1	0	0.000604255	8.50999	7.73141	0.0112844	0.0132972	0.0191386
0.2	0.00133333	0.000666667	0.024369	1	0	0.000593848	8.51825	7.73141	0.0110947	0.0132743	0.0191745
0.35	0.007	0.00116667	0.0981835	1	0	0.00964	7.96343	7.73141	0.0778526	0.0203309	0.0227807
0.35	0.00636364	0.00116667	0.0973752	1	0	0.00948194	8.00282	7.73141	0.0742295	0.0231457	0.0264286
0.35	0.00583333	0.00116667	0.096968	1	0	0.0094028	8.04214	7.73141	0.0710694	0.0258987	0.0301304
0.35	0.00538462	0.00116667	0.096277	1	0	0.00926926	8.07501	7.73141	0.0682812	0.0279958	0.0330803
0.35	0.005	0.00116667	0.0939497	1	0	0.00882655	8.08759	7.73141	0.0657974	0.0281523	0.0334629
0.35	0.00466667	0.00116667	0.0922609	1	0	0.00851208	8.10395	7.73141	0.0635664	0.0286946	0.0343706
0.35	0.004375	0.00116667	0.0886155	1	0	0.00785271	8.0959	7.73141	0.0615479	0.0270676	0.0322996
0.35	0.00411765	0.00116667	0.0863437	1	0	0.00745523	8.10024	7.73141	0.0597102	0.0266335	0.0318463
0.35	0.00388889	0.00116667	0.083599	1	0	0.0069888	8.09652	7.73141	0.0580279	0.0255711	0.0305227
0.35	0.00368421	0.00116667	0.0814546	1	0	0.00663486	8.09757	7.73141	0.0564802	0.0249744	0.0298251
0.35	0.0035	0.00116667	0.0782398	1	0	0.00612146	8.08295	7.73141	0.0550501	0.0231897	0.027504
0.35	0.00333333	0.00116667	0.0760348	1	0	0.00578128	8.07875	7.73141	0.0537234	0.0223114	0.0264101
0.35	0.00318182	0.00116667	0.0706513	1	0	0.00499161	8.02858	7.73141	0.0524882	0.0181631	0.0209953
0.35	0.00304348	0.00116667	0.0686254	1	0	0.00470945	8.02171	7.73141	0.0513345	0.017291	0.019922
0.35	0.00291667	0.00116667	0.067059	1	0	0.00449691	8.0199	7.73141	0.0502536	0.0168054	0.0193459
0.35	0.0028	0.00116667	0.0647192	1	0	0.00418857	8.0048	7.73141	0.0492383	0.0154809	0.0176933
0.35	0.00269231	0.00116667	0.0617666	1	0	0.00381511	7.97771	7.73141	0.0482821	0.0134845	0.0152132
0.35	0.00259259	0.00116667	0.0593671	1	0	0.00352445	7.95696	7.73141	0.0473796	0.0119875	0.0133901
0.35	0.0025	0.00116667	0.0579248	1	0	0.00335529	7.95055	7.73141	0.0465258	0.011399	0.0126936
0.35	0.00241379	0.00116667	0.0579825	1	0	0.00336197	7.96909	7.73141	0.0457166	0.0122659	0.0137813
0.35	0.00233333	0.00116667	0.0572388	1	0	0.00327628	7.97313	7.73141	0.0449482	0.0122906	0.0138359
0.5	0.01	0.00166667	0.194565	1	0	0.0378556	7.75567	7.73141	0.189901	0.00466397	0.00472078
0.5	0.00909091	0.00166667	0.193546	1	0	0.0374602	7.79808	7.73141	0.181064	0.0124826	0.0129033
0.5	0.00833333	0.00166667	0.193648	1	0	0.0374994	7.84211	7.73141	0.173355	0.0202921	0.021436
0.5	0.00769231	0.00166667	0.188328	1	0	0.0354674	7.85427	7.73141	0.166554	0.0217735	0.0231384
0.5	0.00714286	0.00166667	0.182878	1	0	0.0334445	7.86196	7.73141	0.160496	0.0223826	0.0238755
0.5	0.00666667	0.00166667	0.178918	1	0	0.0320116	7.87457	7.73141	0.155054	0.0238642	0.0256131
0.5	0.00625	0.00166667	0.178831	1	0	0.0319804	7.90635	7.73141	0.15013	0.0287006	0.0312842
0.5	0.00588235	0.00166667	0.182987	1	0	0.0334844	7.95964	7.73141	0.145648	0.0373398	0.0417627
0.5	0.00555556	0.00166667	0.175421	1	0	0.0307726	7.94599	7.73141	0.141544	0.0338773	0.0376419
0.5	0.00526316	0.00166667	0.175421	1	0	0.0307725	7.97302	7.73141	0.137769	0.0376521	0.0423837
0.5	0.005	0.00166667	0.169155	1	0	0.0286135	7.9623	7.73141	0.13428	0.0348747	0.0390555
0.5	0.0047619	0.00166667	0.171111	1	0	0.0292789	7.99819	7.73141	0.131044	0.0400665	0.0456482
0.5	0.00454545	0.00166667	0.157394	1	0	0.0247729	7.93789	7.73141	0.128031	0.0293627	0.0324983
0.5	0.00434783	0.00166667	0.151424	1	0	0.0229291	7.92144	7.73141	0.125217	0.0262063	0.0287751
0.5	0.00416667	0.00166667	0.160899	1	0	0.0258884	8.00342	7.73141	0.122581	0.0383181	0.0437654
0.5	0.004	0.00166667	0.151775	1	0	0.0230356	7.96545	7.73141	0.120104	0.0316707	0.0355212
0.5	0.00384615	0.00166667	0.150078	1	0	0.0225233	7.97382	7.73141	0.117772	0.032306	0.0363796
0.5	0.0037037	0.00166667	0.149829	1	0	0.0224487	7.99103	7.73141	0.11557	0.0342586	0.0388978
0.5	0.00357143	0.00166667	0.138987	1	0	0.0193173	7.93409	7.73141	0.113488	0.0254989	0.0281703
0.5	0.00344828	0.00166667	0.127188	1	0	0.0161767	7.86292	7.73141	0.111514	0.0156736	0.0167269
0.5	0.00333333	0.00166667	0.109727	1	0	0.0120399	7.7322	7.73141	0.10964	8.70267e-05	8.70612e-05
0.7	0.014	0.00233333	0.413153	1	0	0.170695	7.66754	7.73141	0.440401	-0.0272477	-0.0263869
0.7	0.0127273	0.00233333	0.411064	1	0	0.168973	7.71013	7.73141	0.419906	-0.0088419	-0.00874814
0.7	0.0116667	0.00233333	0.392723	1	0	0.154231	7.70799	7.73141	0.402029	-0.00930647	-0.00919791
0.7	0.0107692	0.00233333	0.370467	1	0	0.137246	7.68967	7.73141	0.386257	-0.0157898	-0.0154625
0.7	0.01	0.00233333	0.37626	1	0	0.141572	7.74224	7.73141	0.372207	0.00405375	0.00407575
0.7	0.00933333	0.00233333	0.37298	1	0	0.139114	7.76798	7.73141	0.359586	0.0133946	0.0136411
0.7	0.00875	0.00233333	0.363891	1	0	0.132417	7.77558	7.73141	0.348167	0.0157237	0.0160735
0.7	0.00823529	0.00233333	0.343637	1	0	0.118087	7.74863	7.73141	0.337772	0.00586533	0.00591596
0.7	0.00777778	0.00233333	0.344569	1	0	0.118728	7.77991	7.73141	0.328255	0.0163133	0.0167121
0.7	0.00736842	0.00233333	0.333061	1	0	0.11093	7.77298	7.73141	0.3195	0.0135612	0.013845
0.7	0.007	0.00233333	0.316566	1	0	0.100214	7.74783	7.73141	0.31141	0.00515594	0.00519839
0.7	0.00666667	0.00233333	0.322234	1	0	0.103835	7.78997	7.73141	0.303905	0.0183289	0.0188709
0.7	0.00636364	0.00233333	0.298566	1	0	0.0891414	7.73694	7.73141	0.296918	0.00164755	0.00165211
0.7	0.00608696	0.00233333	0.2976	1	0	0.0885656	7.75593	7.73141	0.290392	0.00720814	0.00729687
0.7	0.00583333	0.00233333	0.302019	1	0	0.0912152	7.79195	7.73141	0.284277	0.0177412	0.0182836
0.7	0.0056	0.00233333	0.302085	1	0	0.0912551	7.81258	7.73141	0.278534	0.0235507	0.0245194
0.7	0.00538462	0.00233333	0.28883	1	0	0.0834227	7.78732	7.73141	0.273125	0.0157049	0.016148
0.7	0.00518519	0.00233333	0.269567	1	0	0.0726665	7.73717	7.73141	0.268019	0.00154788	0.00155234
0.7	0.005	0.00233333	0.265516	1	0	0.0704987	7.74021	7.73141	0.26319	0.00232608	0.00233633
0.7	0.00482759	0.00233333	0.253977	1	0	0.0645045	7.71333	7.73141	0.258612	-0.0046348	-0.00459302
0.7	0.00466667	0.00233333	0.246248	1	0	0.060638	7.69937	7.73141	0.254265	-0.0080177	-0.00788994

## Sheet: Figure S2
[LLA]0	[I]0	[cat]0	-d[LLA]/dt	-d[LLA]/dt^	res	1	ln[LLA]	ln[I]	ln[cat]	ln(-d[LLA]/dt)	W	y^	res	wres			Parameters		errors			Statistics
0.2	0.002	0.001	0.0347143	0.032335	0.00237934	1	-1.60944	-6.21461	-6.90776	-3.3606	0.00120508	-3.43161	0.0710026	0.0024648		ln k	1.52416	+/-	0.327483		N	199
0.22	0.0022	0.0011	0.0397377	0.0393708	0.000366871	1	-1.51413	-6.1193	-6.81245	-3.22546	0.00157908	-3.23473	0.00927519	0.000368575		a	1.73661	+/-	0.0963891		SSWR	0.311696
0.24	0.0024	0.0012	0.0428996	0.0471229	-0.00422325	1	-1.42712	-6.03229	-6.72543	-3.14889	0.00184038	-3.055	-0.0938956	-0.00402808		b	0.161539	+/-	0.0659417		se	0.0399805
0.26	0.0026	0.0013	0.050412	0.0555952	-0.00518319	1	-1.34707	-5.95224	-6.64539	-2.98753	0.00254137	-2.88966	-0.0978673	-0.00493369		c	0.167477	+/-	0.024083		RMSE	0.0412935
0.28	0.0028	0.0014	0.059398	0.0647916	-0.00539359	1	-1.27297	-5.87814	-6.57128	-2.82349	0.00352813	-2.73658	-0.0869153	-0.0051626
0.3	0.003	0.0015	0.0654577	0.0747157	-0.00925804	1	-1.20397	-5.80914	-6.50229	-2.72635	0.0042847	-2.59407	-0.132287	-0.00865918		k	4.59128	×/÷	1.38747
0.32	0.0032	0.0016	0.0755338	0.0853707	-0.00983693	1	-1.13943	-5.7446	-6.43775	-2.58318	0.00570535	-2.46075	-0.122423	-0.00924708
0.34	0.0034	0.0017	0.088143	0.0967597	-0.00861672	1	-1.07881	-5.68398	-6.37713	-2.42879	0.00776919	-2.33552	-0.0932703	-0.00822112
0.36	0.0036	0.0018	0.103613	0.108886	-0.00527276	1	-1.02165	-5.62682	-6.31997	-2.26709	0.0107356	-2.21746	-0.0496365	-0.00514298
0.38	0.0038	0.0019	0.11287	0.121751	-0.00888148	1	-0.967584	-5.57275	-6.2659	-2.18152	0.0127396	-2.10577	-0.0757452	-0.00854936
0.4	0.004	0.002	0.1267	0.13536	-0.0086592	1	-0.916291	-5.52146	-6.21461	-2.06593	0.016053	-1.99982	-0.0661097	-0.00837613
0.42	0.0042	0.0021	0.152181	0.149713	0.00246832	1	-0.867501	-5.47267	-6.16582	-1.88269	0.023159	-1.89904	0.0163526	0.00248855		XTWX					XTWY
0.44	0.0044	0.0022	0.169661	0.164813	0.004848	1	-0.820981	-5.42615	-6.1193	-1.77395	0.0287848	-1.80294	0.0289909	0.00491862		10.0973	-4.42736	-50.4945	-63.1711		-11.0352
0.46	0.0046	0.0023	0.180541	0.180663	-0.000121157	1	-0.776529	-5.3817	-6.07485	-1.71179	0.0325952	-1.71112	-0.000670852	-0.000121117		-4.42736	2.2871	22.4807	28.0539		5.5537
0.48	0.0048	0.0024	0.197215	0.197264	-4.96294e-05	1	-0.733969	-5.33914	-6.03229	-1.62346	0.0388936	-1.62321	-0.00025162	-4.96232e-05		-50.4945	22.4807	253.215	316.304		55.9567
0.5	0.005	0.0025	0.221933	0.21462	0.00731334	1	-0.693147	-5.29832	-5.99146	-1.50538	0.0492542	-1.53889	0.0335081	0.00743655		-63.1711	28.0539	316.304	398.34		70.2443
0.52	0.0052	0.0026	0.242414	0.232731	0.00968329	1	-0.653926	-5.2591	-5.95224	-1.41711	0.0587646	-1.45787	0.040765	0.009882
0.54	0.0054	0.0027	0.254447	0.2516	0.00284676	1	-0.616186	-5.22136	-5.9145	-1.36866	0.0647431	-1.37992	0.0112511	0.0028628		(XTWX)-1
0.56	0.0056	0.0028	0.269709	0.271229	-0.00152015	1	-0.579818	-5.18499	-5.87814	-1.31041	0.0727427	-1.30479	-0.00562044	-0.00151588		67.0934	-12.6258	12.1468	1.88405
0.58	0.0058	0.0029	0.287192	0.291619	-0.004427	1	-0.544727	-5.1499	-5.84304	-1.2476	0.0824792	-1.23231	-0.0152972	-0.00439322		-12.6258	5.81245	-2.62807	-0.324786
0.6	0.006	0.003	0.305869	0.312772	-0.00690306	1	-0.510826	-5.116	-5.80914	-1.1846	0.0935561	-1.16228	-0.0223178	-0.00682632		12.1468	-2.62807	2.72035	-0.0487122
0.62	0.0062	0.0031	0.340703	0.334691	0.00601247	1	-0.478036	-5.08321	-5.77635	-1.07674	0.116079	-1.09455	0.0178048	0.00606615		1.88405	-0.324786	-0.0487122	0.362847
0.64	0.0064	0.0032	0.365009	0.357376	0.00763298	1	-0.446287	-5.05146	-5.7446	-1.00783	0.133232	-1.02897	0.0211335	0.00771392
0.66	0.0066	0.0033	0.374071	0.380829	-0.00675858	1	-0.415515	-5.02069	-5.71383	-0.98331	0.139929	-0.965404	-0.0179064	-0.00669825
0.68	0.0068	0.0034	0.413343	0.405053	0.00829001	1	-0.385662	-4.99083	-5.68398	-0.883479	0.170852	-0.903739	0.0202599	0.00837427
0.7	0.007	0.0035	0.450967	0.430047	0.0209205	1	-0.356675	-4.96185	-5.65499	-0.79636	0.203372	-0.843861	0.0475008	0.0214213
0.72	0.0072	0.0036	0.463274	0.455814	0.00746025	1	-0.328504	-4.93367	-5.62682	-0.769436	0.214623	-0.78567	0.0162344	0.00752097
0.74	0.0074	0.0037	0.476823	0.482355	-0.00553251	1	-0.301105	-4.90628	-5.59942	-0.74061	0.22736	-0.729074	-0.0115361	-0.00550066
0.76	0.0076	0.0038	0.499516	0.509672	-0.0101564	1	-0.274437	-4.87961	-5.57275	-0.694116	0.249516	-0.673987	-0.0201285	-0.0100545
0.78	0.0078	0.0039	0.521094	0.537766	-0.0166723	1	-0.248461	-4.85363	-5.54678	-0.651825	0.271539	-0.620332	-0.0314937	-0.0164112
0.8	0.008	0.004	0.547077	0.566638	-0.019561	1	-0.223144	-4.82831	-5.52146	-0.603166	0.299293	-0.568035	-0.0351311	-0.0192194
0.2	0.002	0.001	0.0209744	0.032335	-0.0113606	1	-1.60944	-6.21461	-6.90776	-3.86445	0.000439924	-3.43161	-0.432848	-0.00907871
0.2	0.002	0.0008	0.0193015	0.0311489	-0.0118473	1	-1.60944	-6.21461	-7.1309	-3.94757	0.000372549	-3.46898	-0.478593	-0.00923758
0.2	0.002	0.000666667	0.017318	0.0302121	-0.0128941	1	-1.60944	-6.21461	-7.31322	-4.05601	0.000299912	-3.49951	-0.556498	-0.00963742
0.2	0.002	0.000571429	0.015404	0.0294421	-0.0140381	1	-1.60944	-6.21461	-7.46737	-4.17313	0.000237284	-3.52533	-0.647797	-0.00997868
0.2	0.002	0.0005	0.0136949	0.028791	-0.0150961	1	-1.60944	-6.21461	-7.6009	-4.29073	0.000187551	-3.54769	-0.743037	-0.0101758
0.2	0.002	0.000444444	0.0133879	0.0282286	-0.0148407	1	-1.60944	-6.21461	-7.71869	-4.3134	0.000179237	-3.56742	-0.745983	-0.00998717
0.2	0.002	0.0004	0.0134653	0.0277349	-0.0142696	1	-1.60944	-6.21461	-7.82405	-4.30764	0.000181315	-3.58506	-0.722573	-0.00972968
0.2	0.002	0.000363636	0.0134021	0.0272957	-0.0138936	1	-1.60944	-6.21461	-7.91936	-4.31234	0.000179616	-3.60103	-0.711318	-0.00953315
0.2	0.002	0.000333333	0.0124348	0.0269008	-0.014466	1	-1.60944	-6.21461	-8.00637	-4.38725	0.000154625	-3.6156	-0.771655	-0.0095954
0.2	0.002	0.000307692	0.0126651	0.0265426	-0.0138775	1	-1.60944	-6.21461	-8.08641	-4.36891	0.000160405	-3.629	-0.739901	-0.00937092
0.2	0.002	0.000285714	0.01331	0.0262152	-0.0129052	1	-1.60944	-6.21461	-8.16052	-4.31924	0.000177155	-3.64142	-0.677827	-0.00902185
0.2	0.002	0.000266667	0.0113329	0.025914	-0.0145811	1	-1.60944	-6.21461	-8.22951	-4.48004	0.000128435	-3.65297	-0.827072	-0.00937315
0.2	0.002	0.00025	0.0124328	0.0256355	-0.0132027	1	-1.60944	-6.21461	-8.29405	-4.38742	0.000154575	-3.66378	-0.723638	-0.00899685
0.2	0.002	0.000235294	0.0136895	0.0253765	-0.011687	1	-1.60944	-6.21461	-8.35467	-4.29112	0.000187403	-3.67393	-0.617192	-0.00844906
0.2	0.002	0.000222222	0.0140942	0.0251347	-0.0110405	1	-1.60944	-6.21461	-8.41183	-4.26199	0.000198646	-3.6835	-0.578487	-0.00815331
0.2	0.002	0.000210526	0.0128937	0.0249082	-0.0120144	1	-1.60944	-6.21461	-8.4659	-4.35101	0.000166248	-3.69256	-0.658454	-0.00848993
0.2	0.002	0.0002	0.0123892	0.0246951	-0.0123059	1	-1.60944	-6.21461	-8.51719	-4.39093	0.000153493	-3.70115	-0.689777	-0.00854581
0.2	0.002	0.000190476	0.0104541	0.0244941	-0.01404	1	-1.60944	-6.21461	-8.56598	-4.56076	0.000109288	-3.70932	-0.851439	-0.00890103
0.2	0.002	0.000181818	0.0102134	0.024304	-0.0140906	1	-1.60944	-6.21461	-8.6125	-4.58405	0.000104314	-3.71711	-0.866942	-0.00885443
0.2	0.002	0.000173913	0.0133115	0.0241238	-0.0108122	1	-1.60944	-6.21461	-8.65696	-4.31912	0.000177197	-3.72456	-0.594567	-0.0079146
0.2	0.002	0.000166667	0.0112618	0.0239524	-0.0126906	1	-1.60944	-6.21461	-8.69951	-4.48634	0.000126828	-3.73169	-0.754654	-0.00849876
0.35	0.0035	0.00175	0.162778	0.10273	0.0600477	1	-1.04982	-5.65499	-6.34814	-1.81537	0.0264967	-2.27565	0.46028	0.0749234
0.35	0.0035	0.0014	0.148717	0.0989621	0.0497549	1	-1.04982	-5.65499	-6.57128	-1.90571	0.0221168	-2.31302	0.407308	0.0605737
0.35	0.0035	0.00116667	0.129804	0.095986	0.0338177	1	-1.04982	-5.65499	-6.7536	-2.04173	0.016849	-2.34355	0.301821	0.0391775
0.35	0.0035	0.001	0.119214	0.0935397	0.0256742	1	-1.04982	-5.65499	-6.90776	-2.12684	0.0142119	-2.36937	0.242533	0.0289133
0.35	0.0035	0.000875	0.107045	0.091471	0.015574	1	-1.04982	-5.65499	-7.04129	-2.23451	0.0114586	-2.39173	0.157228	0.0168304
0.35	0.0035	0.000777778	0.0970024	0.0896843	0.00731805	1	-1.04982	-5.65499	-7.15907	-2.33302	0.00940946	-2.41146	0.0784394	0.00760881
0.35	0.0035	0.0007	0.0850684	0.0881157	-0.00304732	1	-1.04982	-5.65499	-7.26443	-2.4643	0.00723663	-2.4291	-0.0351953	-0.002994
0.35	0.0035	0.000636364	0.0715515	0.0867203	-0.0151688	1	-1.04982	-5.65499	-7.35974	-2.63734	0.00511962	-2.44507	-0.192271	-0.0137573
0.35	0.0035	0.000583333	0.0636025	0.0854658	-0.0218633	1	-1.04982	-5.65499	-7.44675	-2.7551	0.00404527	-2.45964	-0.295464	-0.0187922
0.35	0.0035	0.000538462	0.0535372	0.0843277	-0.0307905	1	-1.04982	-5.65499	-7.52679	-2.92738	0.00286623	-2.47304	-0.454333	-0.0243237
0.35	0.0035	0.0005	0.0528634	0.0832876	-0.0304242	1	-1.04982	-5.65499	-7.6009	-2.94004	0.00279453	-2.48546	-0.454589	-0.0240311
0.35	0.0035	0.000466667	0.0492	0.0823307	-0.0331307	1	-1.04982	-5.65499	-7.6699	-3.01186	0.00242064	-2.49701	-0.51485	-0.0253306
0.35	0.0035	0.0004375	0.0473744	0.0814456	-0.0340712	1	-1.04982	-5.65499	-7.73443	-3.04967	0.00224434	-2.50782	-0.541853	-0.02567
0.35	0.0035	0.000411765	0.0486925	0.0806229	-0.0319304	1	-1.04982	-5.65499	-7.79506	-3.02223	0.00237096	-2.51797	-0.504257	-0.0245535
0.35	0.0035	0.000388889	0.0489504	0.0798548	-0.0309044	1	-1.04982	-5.65499	-7.85222	-3.01695	0.00239614	-2.52755	-0.489403	-0.0239565
0.35	0.0035	0.000368421	0.0404191	0.079135	-0.0387158	1	-1.04982	-5.65499	-7.90628	-3.20845	0.0016337	-2.5366	-0.671852	-0.0271557
0.35	0.0035	0.00035	0.0348781	0.0784581	-0.0435799	1	-1.04982	-5.65499	-7.95758	-3.35589	0.00121648	-2.54519	-0.810704	-0.0282758
0.35	0.0035	0.000333333	0.0438765	0.0778196	-0.0339431	1	-1.04982	-5.65499	-8.00637	-3.12638	0.00192514	-2.55336	-0.573015	-0.0251419
0.35	0.0035	0.000318182	0.0376396	0.0772156	-0.039576	1	-1.04982	-5.65499	-8.05289	-3.2797	0.00141674	-2.56115	-0.718546	-0.0270458
0.35	0.0035	0.000304348	0.0417063	0.0766429	-0.0349366	1	-1.04982	-5.65499	-8.09734	-3.1771	0.00173942	-2.5686	-0.608504	-0.0253785
0.35	0.0035	0.000291667	0.0407967	0.0760986	-0.0353019	1	-1.04982	-5.65499	-8.1399	-3.19915	0.00166437	-2.57573	-0.623428	-0.0254338
0.5	0.005	0.0025	0.324023	0.21462	0.109403	1	-0.693147	-5.29832	-5.99146	-1.12694	0.104991	-1.53889	0.411946	0.13348
0.5	0.005	0.002	0.311626	0.206747	0.104879	1	-0.693147	-5.29832	-6.21461	-1.16595	0.0971106	-1.57626	0.410307	0.127862
0.5	0.005	0.00166667	0.291538	0.200529	0.0910088	1	-0.693147	-5.29832	-6.39693	-1.23258	0.0849945	-1.60679	0.37421	0.109097
0.5	0.005	0.00142857	0.247332	0.195419	0.0519131	1	-0.693147	-5.29832	-6.55108	-1.39702	0.061173	-1.63261	0.235586	0.058268
0.5	0.005	0.00125	0.227744	0.191097	0.0366473	1	-0.693147	-5.29832	-6.68461	-1.47953	0.0518674	-1.65497	0.175442	0.039956
0.5	0.005	0.00111111	0.214447	0.187364	0.0270823	1	-0.693147	-5.29832	-6.80239	-1.53969	0.0459873	-1.6747	0.135006	0.0289516
0.5	0.005	0.001	0.206055	0.184087	0.0219677	1	-0.693147	-5.29832	-6.90776	-1.57961	0.0424586	-1.69235	0.112733	0.0232292
0.5	0.005	0.000909091	0.201053	0.181172	0.0198806	1	-0.693147	-5.29832	-7.00307	-1.60419	0.0404221	-1.70831	0.10412	0.0209335
0.5	0.005	0.000833333	0.192289	0.178551	0.013738	1	-0.693147	-5.29832	-7.09008	-1.64876	0.0369751	-1.72288	0.0741254	0.0142535
0.5	0.005	0.000769231	0.167579	0.176173	-0.00859489	1	-0.693147	-5.29832	-7.17012	-1.7863	0.0280826	-1.73629	-0.0500167	-0.00838173
0.5	0.005	0.000714286	0.165319	0.174	-0.00868167	1	-0.693147	-5.29832	-7.24423	-1.79988	0.0273303	-1.7487	-0.0511823	-0.00846139
0.5	0.005	0.000666667	0.162287	0.172001	-0.00971497	1	-0.693147	-5.29832	-7.31322	-1.81839	0.0263369	-1.76025	-0.0581397	-0.00943529
0.5	0.005	0.000625	0.167115	0.170152	-0.00303736	1	-0.693147	-5.29832	-7.37776	-1.78907	0.0279274	-1.77106	-0.0180121	-0.00301009
0.5	0.005	0.000588235	0.170113	0.168434	0.00167975	1	-0.693147	-5.29832	-7.43838	-1.77129	0.0289385	-1.78121	0.00992337	0.0016881
0.5	0.005	0.000555556	0.160167	0.166829	-0.00666232	1	-0.693147	-5.29832	-7.49554	-1.83154	0.0256533	-1.79079	-0.0407544	-0.00652749
0.5	0.005	0.000526316	0.166465	0.165325	0.00114008	1	-0.693147	-5.29832	-7.54961	-1.79297	0.0277106	-1.79984	0.00687232	0.001144
0.5	0.005	0.0005	0.159919	0.163911	-0.0039922	1	-0.693147	-5.29832	-7.6009	-1.83309	0.025574	-1.80843	-0.0246574	-0.00394318
0.5	0.005	0.00047619	0.158211	0.162577	-0.00436597	1	-0.693147	-5.29832	-7.64969	-1.84383	0.0250307	-1.8166	-0.027222	-0.00430681
0.5	0.005	0.000454545	0.154554	0.161315	-0.00676091	1	-0.693147	-5.29832	-7.69621	-1.86721	0.023887	-1.82439	-0.0428148	-0.00661721
0.5	0.005	0.000434783	0.150757	0.160119	-0.00936194	1	-0.693147	-5.29832	-7.74066	-1.89209	0.0227276	-1.83184	-0.0602477	-0.00908275
0.5	0.005	0.000416667	0.142757	0.158982	-0.016225	1	-0.693147	-5.29832	-7.78322	-1.94661	0.0203794	-1.83897	-0.107648	-0.0153674
0.7	0.007	0.0035	0.559762	0.430047	0.129715	1	-0.356675	-4.96185	-5.65499	-0.580244	0.313333	-0.843861	0.263617	0.147562
0.7	0.007	0.0028	0.545885	0.414272	0.131613	1	-0.356675	-4.96185	-5.87814	-0.605348	0.29799	-0.881232	0.275885	0.150601
0.7	0.007	0.00233333	0.509825	0.401814	0.108012	1	-0.356675	-4.96185	-6.06046	-0.673687	0.259922	-0.911767	0.23808	0.121379
0.7	0.007	0.002	0.478473	0.391573	0.0869001	1	-0.356675	-4.96185	-6.21461	-0.737156	0.228936	-0.937584	0.200428	0.0958994
0.7	0.007	0.00175	0.449424	0.382913	0.0665106	1	-0.356675	-4.96185	-6.34814	-0.799789	0.201982	-0.959947	0.160158	0.0719789
0.7	0.007	0.00155556	0.433138	0.375434	0.0577046	1	-0.356675	-4.96185	-6.46592	-0.836698	0.187609	-0.979673	0.142975	0.061928
0.7	0.007	0.0014	0.420349	0.368867	0.0514818	1	-0.356675	-4.96185	-6.57128	-0.86667	0.176693	-0.997319	0.130649	0.0549181
0.7	0.007	0.00127273	0.405909	0.363026	0.0428828	1	-0.356675	-4.96185	-6.66659	-0.901627	0.164762	-1.01328	0.111654	0.0453213
0.7	0.007	0.00116667	0.400416	0.357774	0.0426418	1	-0.356675	-4.96185	-6.7536	-0.915252	0.160333	-1.02785	0.112602	0.0450876
0.7	0.007	0.00107692	0.397765	0.35301	0.0447546	1	-0.356675	-4.96185	-6.83365	-0.921895	0.158217	-1.04126	0.119364	0.0474788
0.7	0.007	0.001	0.391737	0.348656	0.0430814	1	-0.356675	-4.96185	-6.90776	-0.937164	0.153458	-1.05367	0.116506	0.0456398
0.7	0.007	0.000933333	0.381888	0.34465	0.0372376	1	-0.356675	-4.96185	-6.97675	-0.962628	0.145838	-1.06523	0.102597	0.0391805
0.7	0.007	0.000875	0.368724	0.340945	0.027779	1	-0.356675	-4.96185	-7.04129	-0.997707	0.135957	-1.07603	0.0783271	0.0288811
0.7	0.007	0.000823529	0.352356	0.337501	0.0148552	1	-0.356675	-4.96185	-7.10191	-1.04311	0.124155	-1.08619	0.043074	0.0151774
0.7	0.007	0.000777778	0.346834	0.334286	0.0125484	1	-0.356675	-4.96185	-7.15907	-1.05891	0.120294	-1.09576	0.0368505	0.012781
0.7	0.007	0.000736842	0.337222	0.331272	0.00594997	1	-0.356675	-4.96185	-7.21314	-1.08701	0.113719	-1.10481	0.0178016	0.00600308
0.7	0.007	0.0007	0.318539	0.328439	-0.00990014	1	-0.356675	-4.96185	-7.26443	-1.14401	0.101467	-1.11341	-0.0306067	-0.00974941
0.7	0.007	0.000666667	0.309249	0.325766	-0.0165166	1	-0.356675	-4.96185	-7.31322	-1.17361	0.0956351	-1.12158	-0.0520312	-0.0160906
0.7	0.007	0.000636364	0.308837	0.323238	-0.0144002	1	-0.356675	-4.96185	-7.35974	-1.17494	0.0953806	-1.12937	-0.0455727	-0.0140746
0.7	0.007	0.000608696	0.29434	0.32084	-0.0265002	1	-0.356675	-4.96185	-7.40419	-1.22302	0.086636	-1.13681	-0.0862076	-0.0253744
0.7	0.007	0.000583333	0.283408	0.318561	-0.0351535	1	-0.356675	-4.96185	-7.44675	-1.26087	0.0803201	-1.14394	-0.116928	-0.0331383
0.2	0.004	0.000666667	0.0234392	0.0337916	-0.0103524	1	-1.60944	-5.52146	-7.31322	-3.75334	0.000549398	-3.38754	-0.365802	-0.00857411
0.2	0.00363636	0.000666667	0.0219941	0.0332753	-0.0112813	1	-1.60944	-5.61677	-7.31322	-3.81698	0.000483739	-3.40294	-0.414044	-0.00910651
0.2	0.00333333	0.000666667	0.0229548	0.0328109	-0.00985611	1	-1.60944	-5.70378	-7.31322	-3.77423	0.000526923	-3.41699	-0.357234	-0.00820024
0.2	0.00307692	0.000666667	0.0158921	0.0323894	-0.0164973	1	-1.60944	-5.78383	-7.31322	-4.14193	0.00025256	-3.42992	-0.712007	-0.0113153
0.2	0.00285714	0.000666667	0.0135894	0.032004	-0.0184146	1	-1.60944	-5.85793	-7.31322	-4.29847	0.000184671	-3.4419	-0.856572	-0.0116403
0.2	0.00266667	0.000666667	0.0168447	0.0316493	-0.0148046	1	-1.60944	-5.92693	-7.31322	-4.08372	0.000283744	-3.45304	-0.630679	-0.0106236
0.2	0.0025	0.000666667	0.01426	0.031321	-0.017061	1	-1.60944	-5.99146	-7.31322	-4.25029	0.000203349	-3.46347	-0.786829	-0.0112202
0.2	0.00235294	0.000666667	0.0213216	0.0310158	-0.00969415	1	-1.60944	-6.05209	-7.31322	-3.84803	0.000454612	-3.47326	-0.374774	-0.00799079
0.2	0.00222222	0.000666667	0.0152986	0.0307307	-0.0154321	1	-1.60944	-6.10925	-7.31322	-4.17999	0.000234047	-3.48249	-0.697501	-0.0106708
0.2	0.00210526	0.000666667	0.0158685	0.0304635	-0.014595	1	-1.60944	-6.16331	-7.31322	-4.14342	0.000251809	-3.49123	-0.652193	-0.0103493
0.2	0.002	0.000666667	0.0129944	0.0302121	-0.0172177	1	-1.60944	-6.21461	-7.31322	-4.34323	0.000168855	-3.49951	-0.843722	-0.0109637
0.2	0.00190476	0.000666667	0.01898	0.0299749	-0.0109949	1	-1.60944	-6.2634	-7.31322	-3.96437	0.000360242	-3.50739	-0.456974	-0.00867338
0.2	0.00181818	0.000666667	0.013556	0.0297505	-0.0161945	1	-1.60944	-6.30992	-7.31322	-4.30092	0.000183766	-3.51491	-0.786015	-0.0106552
0.2	0.00173913	0.000666667	0.0194156	0.0295377	-0.0101221	1	-1.60944	-6.35437	-7.31322	-3.94168	0.000376966	-3.52209	-0.419589	-0.00814657
0.2	0.00166667	0.000666667	0.0143331	0.0293353	-0.0150022	1	-1.60944	-6.39693	-7.31322	-4.24519	0.000205437	-3.52896	-0.716222	-0.0102657
0.2	0.0016	0.000666667	0.0159978	0.0291425	-0.0131447	1	-1.60944	-6.43775	-7.31322	-4.1353	0.00025593	-3.53556	-0.599745	-0.00959461
0.2	0.00153846	0.000666667	0.020576	0.0289584	-0.00838239	1	-1.60944	-6.47697	-7.31322	-3.88363	0.000423373	-3.54189	-0.341734	-0.00703153
0.2	0.00148148	0.000666667	0.0172862	0.0287824	-0.0114962	1	-1.60944	-6.51471	-7.31322	-4.05784	0.000298814	-3.54799	-0.509854	-0.00881346
0.2	0.00142857	0.000666667	0.0188263	0.0286138	-0.00978755	1	-1.60944	-6.55108	-7.31322	-3.9725	0.000354428	-3.55387	-0.418637	-0.00788136
0.2	0.00137931	0.000666667	0.0245816	0.0284521	-0.00387047	1	-1.60944	-6.58617	-7.31322	-3.70576	0.000604255	-3.55953	-0.146223	-0.00359439
0.2	0.00133333	0.000666667	0.024369	0.0282967	-0.00392769	1	-1.60944	-6.62007	-7.31322	-3.71444	0.000593848	-3.56501	-0.149433	-0.00364153
0.35	0.007	0.00116667	0.0981835	0.107358	-0.00917484	1	-1.04982	-4.96185	-6.7536	-2.32092	0.00964	-2.23158	-0.089334	-0.00877113
0.35	0.00636364	0.00116667	0.0973752	0.105718	-0.00834285	1	-1.04982	-5.05716	-6.7536	-2.32918	0.00948194	-2.24698	-0.082204	-0.00800464
0.35	0.00583333	0.00116667	0.096968	0.104243	-0.00727452	1	-1.04982	-5.14417	-6.7536	-2.33337	0.0094028	-2.26103	-0.0723391	-0.00701458
0.35	0.00538462	0.00116667	0.096277	0.102903	-0.00662636	1	-1.04982	-5.22421	-6.7536	-2.34053	0.00926926	-2.27396	-0.0665609	-0.00640828
0.35	0.005	0.00116667	0.0939497	0.101679	-0.00772909	1	-1.04982	-5.29832	-6.7536	-2.365	0.00882655	-2.28594	-0.0790591	-0.00742758
0.35	0.00466667	0.00116667	0.0922609	0.100552	-0.00829097	1	-1.04982	-5.36731	-6.7536	-2.38313	0.00851208	-2.29708	-0.0860533	-0.00793936
0.35	0.004375	0.00116667	0.0886155	0.0995091	-0.0108935	1	-1.04982	-5.43185	-6.7536	-2.42345	0.00785271	-2.30751	-0.115942	-0.0102742
0.35	0.00411765	0.00116667	0.0863437	0.0985393	-0.0121956	1	-1.04982	-5.49247	-6.7536	-2.44942	0.00745523	-2.3173	-0.13212	-0.0114077
0.35	0.00388889	0.00116667	0.083599	0.0976336	-0.0140346	1	-1.04982	-5.54963	-6.7536	-2.48172	0.0069888	-2.32653	-0.15519	-0.0129738
0.35	0.00368421	0.00116667	0.0814546	0.0967846	-0.01533	1	-1.04982	-5.6037	-6.7536	-2.50771	0.00663486	-2.33527	-0.172442	-0.0140462
0.35	0.0035	0.00116667	0.0782398	0.095986	-0.0177462	1	-1.04982	-5.65499	-6.7536	-2.54798	0.00612146	-2.34355	-0.204424	-0.0159941
0.35	0.00333333	0.00116667	0.0760348	0.0952325	-0.0191977	1	-1.04982	-5.70378	-6.7536	-2.57656	0.00578128	-2.35143	-0.22513	-0.0171177
0.35	0.00318182	0.00116667	0.0706513	0.0945195	-0.0238682	1	-1.04982	-5.7503	-6.7536	-2.65	0.00499161	-2.35895	-0.29105	-0.020563
0.35	0.00304348	0.00116667	0.0686254	0.0938432	-0.0252178	1	-1.04982	-5.79475	-6.7536	-2.67909	0.00470945	-2.36613	-0.312962	-0.0214772
0.35	0.00291667	0.00116667	0.067059	0.0932002	-0.0261412	1	-1.04982	-5.83731	-6.7536	-2.70218	0.00449691	-2.373	-0.329177	-0.0220743
0.35	0.0028	0.00116667	0.0647192	0.0925877	-0.0278685	1	-1.04982	-5.87814	-6.7536	-2.7377	0.00418857	-2.3796	-0.358098	-0.0231758
0.35	0.00269231	0.00116667	0.0617666	0.0920029	-0.0302363	1	-1.04982	-5.91736	-6.7536	-2.78439	0.00381511	-2.38593	-0.398458	-0.0246114
0.35	0.00259259	0.00116667	0.0593671	0.0914437	-0.0320767	1	-1.04982	-5.9551	-6.7536	-2.82402	0.00352445	-2.39203	-0.431984	-0.0256456
0.35	0.0025	0.00116667	0.0579248	0.0909081	-0.0329833	1	-1.04982	-5.99146	-6.7536	-2.84861	0.00335529	-2.39791	-0.450703	-0.0261069
0.35	0.00241379	0.00116667	0.0579825	0.0903942	-0.0324117	1	-1.04982	-6.02656	-6.7536	-2.84761	0.00336197	-2.40357	-0.444039	-0.0257465
0.35	0.00233333	0.00116667	0.0572388	0.0899005	-0.0326617	1	-1.04982	-6.06046	-6.7536	-2.86052	0.00327628	-2.40905	-0.451472	-0.0258417
0.5	0.01	0.00166667	0.194565	0.224288	-0.0297228	1	-0.693147	-4.60517	-6.39693	-1.63699	0.0378556	-1.49482	-0.142163	-0.0276601
0.5	0.00909091	0.00166667	0.193546	0.220861	-0.0273149	1	-0.693147	-4.70048	-6.39693	-1.64224	0.0374602	-1.51022	-0.132018	-0.0255515
0.5	0.00833333	0.00166667	0.193648	0.217779	-0.0241311	1	-0.693147	-4.78749	-6.39693	-1.64172	0.0374994	-1.52428	-0.117439	-0.0227419
0.5	0.00769231	0.00166667	0.188328	0.214981	-0.0266529	1	-0.693147	-4.86753	-6.39693	-1.66957	0.0354674	-1.53721	-0.132364	-0.0249279
0.5	0.00714286	0.00166667	0.182878	0.212423	-0.0295441	1	-0.693147	-4.94164	-6.39693	-1.69893	0.0334445	-1.54918	-0.149756	-0.0273871
0.5	0.00666667	0.00166667	0.178918	0.210068	-0.0311504	1	-0.693147	-5.01064	-6.39693	-1.72083	0.0320116	-1.56032	-0.160506	-0.0287173
0.5	0.00625	0.00166667	0.178831	0.20789	-0.0290589	1	-0.693147	-5.07517	-6.39693	-1.72132	0.0319804	-1.57075	-0.150567	-0.0269261
0.5	0.00588235	0.00166667	0.182987	0.205864	-0.0228762	1	-0.693147	-5.1358	-6.39693	-1.69834	0.0334844	-1.58054	-0.117797	-0.0215553
0.5	0.00555556	0.00166667	0.175421	0.203972	-0.0285502	1	-0.693147	-5.19296	-6.39693	-1.74056	0.0307726	-1.58977	-0.15079	-0.0264518
0.5	0.00526316	0.00166667	0.175421	0.202198	-0.0267769	1	-0.693147	-5.24702	-6.39693	-1.74057	0.0307725	-1.59851	-0.142058	-0.0249199
0.5	0.005	0.00166667	0.169155	0.200529	-0.0313742	1	-0.693147	-5.29832	-6.39693	-1.77694	0.0286135	-1.60679	-0.170144	-0.0287808
0.5	0.0047619	0.00166667	0.171111	0.198955	-0.0278443	1	-0.693147	-5.34711	-6.39693	-1.76544	0.0292789	-1.61468	-0.150768	-0.025798
0.5	0.00454545	0.00166667	0.157394	0.197466	-0.0400716	1	-0.693147	-5.39363	-6.39693	-1.849	0.0247729	-1.62219	-0.226812	-0.0356988
0.5	0.00434783	0.00166667	0.151424	0.196053	-0.0446293	1	-0.693147	-5.43808	-6.39693	-1.88767	0.0229291	-1.62937	-0.258303	-0.0391132
0.5	0.00416667	0.00166667	0.160899	0.19471	-0.0338107	1	-0.693147	-5.48064	-6.39693	-1.82698	0.0258884	-1.63625	-0.190733	-0.0306887
0.5	0.004	0.00166667	0.151775	0.19343	-0.0416549	1	-0.693147	-5.52146	-6.39693	-1.88536	0.0230356	-1.64284	-0.242516	-0.0368079
0.5	0.00384615	0.00166667	0.150078	0.192208	-0.0421304	1	-0.693147	-5.56068	-6.39693	-1.8966	0.0225233	-1.64918	-0.247425	-0.037133
0.5	0.0037037	0.00166667	0.149829	0.19104	-0.0412111	1	-0.693147	-5.59842	-6.39693	-1.89826	0.0224487	-1.65527	-0.242989	-0.0364067
0.5	0.00357143	0.00166667	0.138987	0.189921	-0.0509342	1	-0.693147	-5.63479	-6.39693	-1.97338	0.0193173	-1.66115	-0.31223	-0.0433957
0.5	0.00344828	0.00166667	0.127188	0.188847	-0.0616598	1	-0.693147	-5.66988	-6.39693	-2.06209	0.0161767	-1.66682	-0.395277	-0.0502742
0.5	0.00333333	0.00166667	0.109727	0.187816	-0.0780894	1	-0.693147	-5.70378	-6.39693	-2.20976	0.0120399	-1.67229	-0.537471	-0.0589748
0.7	0.014	0.00233333	0.413153	0.44942	-0.0362672	1	-0.356675	-4.2687	-6.06046	-0.883937	0.170695	-0.799797	-0.0841403	-0.0347628
0.7	0.0127273	0.00233333	0.411064	0.442554	-0.0314901	1	-0.356675	-4.36401	-6.06046	-0.889007	0.168973	-0.815193	-0.0738138	-0.0303422
0.7	0.0116667	0.00233333	0.392723	0.436377	-0.0436543	1	-0.356675	-4.45102	-6.06046	-0.934652	0.154231	-0.829249	-0.105403	-0.0413941
0.7	0.0107692	0.00233333	0.370467	0.430771	-0.0603036	1	-0.356675	-4.53106	-6.06046	-0.99299	0.137246	-0.842179	-0.150811	-0.0558707
0.7	0.01	0.00233333	0.37626	0.425645	-0.0493844	1	-0.356675	-4.60517	-6.06046	-0.977474	0.141572	-0.85415	-0.123324	-0.0464018
0.7	0.00933333	0.00233333	0.37298	0.420927	-0.0479469	1	-0.356675	-4.67416	-6.06046	-0.98623	0.139114	-0.865295	-0.120934	-0.0451061
0.7	0.00875	0.00233333	0.363891	0.416562	-0.0526706	1	-0.356675	-4.7387	-6.06046	-1.0109	0.132417	-0.875721	-0.13518	-0.0491908
0.7	0.00823529	0.00233333	0.343637	0.412502	-0.0688648	1	-0.356675	-4.79933	-6.06046	-1.06817	0.118087	-0.885514	-0.182655	-0.0627669
0.7	0.00777778	0.00233333	0.344569	0.408711	-0.0641423	1	-0.356675	-4.85648	-6.06046	-1.06546	0.118728	-0.894747	-0.170715	-0.0588229
0.7	0.00736842	0.00233333	0.333061	0.405157	-0.0720953	1	-0.356675	-4.91055	-6.06046	-1.09943	0.11093	-0.903481	-0.195947	-0.0652624
0.7	0.007	0.00233333	0.316566	0.401814	-0.0852473	1	-0.356675	-4.96185	-6.06046	-1.15022	0.100214	-0.911767	-0.238456	-0.075487
0.7	0.00666667	0.00233333	0.322234	0.398659	-0.0764248	1	-0.356675	-5.01064	-6.06046	-1.13248	0.103835	-0.919649	-0.212828	-0.0685804
0.7	0.00636364	0.00233333	0.298566	0.395674	-0.0971088	1	-0.356675	-5.05716	-6.06046	-1.20877	0.0891414	-0.927163	-0.281602	-0.0840767
0.7	0.00608696	0.00233333	0.2976	0.392843	-0.0952437	1	-0.356675	-5.10161	-6.06046	-1.21201	0.0885656	-0.934344	-0.277662	-0.082632
0.7	0.00583333	0.00233333	0.302019	0.390152	-0.0881333	1	-0.356675	-5.14417	-6.06046	-1.19727	0.0912152	-0.941219	-0.256047	-0.0773311
0.7	0.0056	0.00233333	0.302085	0.387588	-0.085503	1	-0.356675	-5.18499	-6.06046	-1.19705	0.0912551	-0.947813	-0.249235	-0.07529
0.7	0.00538462	0.00233333	0.28883	0.38514	-0.0963099	1	-0.356675	-5.22421	-6.06046	-1.24192	0.0834227	-0.954149	-0.287769	-0.0831161
0.7	0.00518519	0.00233333	0.269567	0.382799	-0.113232	1	-0.356675	-5.26195	-6.06046	-1.31094	0.0726665	-0.960246	-0.350692	-0.094535
0.7	0.005	0.00233333	0.265516	0.380557	-0.115041	1	-0.356675	-5.29832	-6.06046	-1.32608	0.0704987	-0.96612	-0.35996	-0.0955752
0.7	0.00482759	0.00233333	0.253977	0.378405	-0.124428	1	-0.356675	-5.33341	-6.06046	-1.37051	0.0645045	-0.971789	-0.398721	-0.101266
0.7	0.00466667	0.00233333	0.246248	0.376339	-0.130091	1	-0.356675	-5.36731	-6.06046	-1.40142	0.060638	-0.977265	-0.424152	-0.104446

## Sheet: Figure S3
t	1	5	10					t	X^ 0.2	X^ 0.4	X^ 0.6	X^ 0.8
[LLA]	X1	X5	X10	k	A	[LLA]eq		0	0	0	0	0
0.2	12.47	20.36	25.4	0.696827	0.234613	0.153077		0.1	1.57918	2.41969	3.83615	5.50065
0.4	19.88	56.21	63.5	0.376844	0.654267	0.138293		0.2	3.05207	4.74989	7.50727	10.695
0.6	33.49	76.9	89.59	0.439688	0.891791	0.0649254		0.3	4.42582	6.99391	11.0205	15.6002
0.8	43.11	93.1	98.51	0.572912	0.987887	0.00969036		0.4	5.7071	9.15495	14.3826	20.2322
								0.5	6.90214	11.2361	17.6	24.6063
								0.6	8.01674	13.2402	20.6791	28.7368
								0.7	9.05631	15.1702	23.6257	32.6374
								0.8	10.0259	17.0289	26.4456	36.3208
								0.9	10.9303	18.8188	29.1441	39.799
								1	11.7737	20.5425	31.7266	43.0837
								1.1	12.5604	22.2025	34.198	46.1854
								1.2	13.2941	23.801	36.5631	49.1144
								1.3	13.9785	25.3405	38.8264	51.8803
								1.4	14.6168	26.823	40.9924	54.4922
								1.5	15.2121	28.2507	43.0652	56.9587
								1.6	15.7674	29.6256	45.0488	59.2878
								1.7	16.2852	30.9496	46.9472	61.4873
								1.8	16.7683	32.2247	48.7638	63.5642
								1.9	17.2188	33.4526	50.5023	65.5256
								2	17.639	34.6351	52.1661	67.3777
								2.1	18.0309	35.7739	53.7582	69.1267
								2.2	18.3964	36.8705	55.2819	70.7783
								2.3	18.7373	37.9266	56.74	72.338
								2.4	19.0553	38.9437	58.1354	73.8108
								2.5	19.3518	39.9231	59.4708	75.2016
								2.6	19.6284	40.8663	60.7487	76.5149
								2.7	19.8864	41.7746	61.9717	77.7551
								2.8	20.1271	42.6494	63.1421	78.9263
								2.9	20.3515	43.4917	64.2621	80.0323
								3	20.5608	44.303	65.3339	81.0766
								3.1	20.756	45.0842	66.3596	82.0629
								3.2	20.9381	45.8365	67.3412	82.9942
								3.3	21.108	46.561	68.2806	83.8736
								3.4	21.2664	47.2588	69.1796	84.7041
								3.5	21.4141	47.9307	70.0399	85.4884
								3.6	21.5519	48.5777	70.8632	86.2289
								3.7	21.6804	49.2009	71.6511	86.9283
								3.8	21.8003	49.8009	72.4051	87.5887
								3.9	21.9121	50.3788	73.1266	88.2123
								4	22.0164	50.9354	73.8171	88.8012
								4.1	22.1136	51.4713	74.478	89.3573
								4.2	22.2043	51.9874	75.1103	89.8825
								4.3	22.2889	52.4844	75.7155	90.3784
								4.4	22.3678	52.9631	76.2947	90.8467
								4.5	22.4414	53.424	76.8489	91.2889
								4.6	22.5101	53.8679	77.3793	91.7065
								4.7	22.5741	54.2954	77.8869	92.1008
								4.8	22.6338	54.7071	78.3726	92.4732
								4.9	22.6895	55.1035	78.8375	92.8249
								5	22.7415	55.4853	79.2824	93.1569
								5.1	22.7899	55.853	79.7081	93.4705
								5.2	22.8351	56.2071	80.1155	93.7667
								5.3	22.8772	56.548	80.5054	94.0463
								5.4	22.9166	56.8764	80.8785	94.3103
								5.5	22.9532	57.1926	81.2355	94.5597
								5.6	22.9874	57.4971	81.5772	94.7952
								5.7	23.0193	57.7904	81.9042	95.0175
								5.8	23.0491	58.0728	82.2172	95.2275
								5.9	23.0768	58.3448	82.5167	95.4258
								6	23.1027	58.6067	82.8032	95.6131
								6.1	23.1268	58.8589	83.0775	95.7899
								6.2	23.1493	59.1018	83.34	95.9569
								6.3	23.1703	59.3357	83.5912	96.1145
								6.4	23.1899	59.561	83.8315	96.2634
								6.5	23.2082	59.7779	84.0616	96.4041
								6.6	23.2252	59.9868	84.2817	96.5368
								6.7	23.2411	60.188	84.4924	96.6622
								6.8	23.2559	60.3818	84.694	96.7806
								6.9	23.2697	60.5684	84.8869	96.8924
								7	23.2826	60.748	85.0715	96.998
								7.1	23.2947	60.9211	85.2482	97.0977
								7.2	23.3059	61.0877	85.4173	97.1919
								7.3	23.3163	61.2482	85.5791	97.2808
								7.4	23.3261	61.4027	85.734	97.3648
								7.5	23.3352	61.5515	85.8822	97.444
								7.6	23.3437	61.6949	86.024	97.5189
								7.7	23.3516	61.8329	86.1597	97.5896
								7.8	23.359	61.9658	86.2896	97.6564
								7.9	23.3659	62.0938	86.4139	97.7194
								8	23.3723	62.217	86.5329	97.779
								8.1	23.3783	62.3357	86.6467	97.8352
								8.2	23.3838	62.4501	86.7556	97.8883
								8.3	23.3891	62.5602	86.8599	97.9384
								8.4	23.3939	62.6662	86.9596	97.9858
								8.5	23.3985	62.7683	87.0551	98.0305
								8.6	23.4027	62.8666	87.1465	98.0727
								8.7	23.4066	62.9613	87.2339	98.1126
								8.8	23.4103	63.0524	87.3176	98.1502
								8.9	23.4137	63.1403	87.3977	98.1858
								9	23.4169	63.2248	87.4743	98.2193
								9.1	23.4199	63.3063	87.5476	98.251
								9.2	23.4227	63.3847	87.6178	98.281
								9.3	23.4253	63.4602	87.685	98.3092
								9.4	23.4277	63.5329	87.7492	98.3359
								9.5	23.43	63.603	87.8107	98.3612
								9.6	23.4321	63.6704	87.8696	98.385
								9.7	23.434	63.7354	87.9259	98.4074
								9.8	23.4359	63.7979	87.9798	98.4287
								9.9	23.4376	63.8582	88.0314	98.4487
								10	23.4392	63.9162	88.0808	98.4676

## Sheet: Figure S4
	conversion data			residuals			parameter estimates										updated parameter estimates
[LLA]	X1	X5	X10	r1	r5	r10	k	A	dc/dA2	dc/dA dc/dk	dc/dk2	Determinant	rdc/dA	rdc/dk	delA	delk	new k	new A	[LLA]eq	-d[LLA]/dt0
0.2	12.47	20.36	25.4	0.00696283	-0.0238146	0.0196082	0.696827	0.234613	2.18954	0.0957444	0.01496	0.0235886	4.16334e-17	-5.76365e-12	2.33943e-11	-5.34994e-10	0.696827	0.234613	0.153077	0.0326969
0.22	14.42	25.33	28.94	0.00439658	-0.0153841	0.0127179	0.70287	0.276927	2.19444	0.111667	0.0205079	0.0325338	1.09288e-16	8.97488e-15	-3.07359e-14	6.04991e-13	0.70287	0.276927	0.159076	0.0428217
0.24	16.16	28.44	32.2	0.00439815	-0.0158379	0.013158	0.710469	0.309096	2.20052	0.122808	0.0250398	0.0400189	-4.51028e-17	-4.734e-13	1.45271e-12	-2.60308e-11	0.710469	0.309096	0.165817	0.0527047
0.26	15.56	30.77	35.82	0.00865042	-0.0172503	0.0125392	0.550606	0.347071	2.04775	0.202325	0.05248	0.0665306	1.42074e-15	3.49117e-10	-1.06169e-09	1.07455e-08	0.550606	0.347071	0.169762	0.0496858
0.28	16.02	35.96	39.32	0.00199568	-0.0035051	0.00244912	0.515044	0.393029	2.00399	0.255403	0.0780481	0.0911768	-1.04083e-17	1.1206e-15	-3.14791e-15	2.46589e-14	0.515044	0.393029	0.169952	0.0566796
0.3	18.13	41.53	42.64	-0.00398516	0.00812439	-0.00594357	0.556735	0.434002	2.05483	0.248541	0.0801259	0.102873	0	-7.54876e-18	1.82378e-17	-1.50783e-16	0.556735	0.434002	0.169799	0.0724871
0.32	17.39	43.23	46.85	-0.00248246	0.00364035	-0.00238404	0.463533	0.475498	1.93098	0.367766	0.146444	0.147529	-2.51535e-17	-2.6048e-17	3.9965e-17	-2.78235e-16	0.463533	0.475498	0.167841	0.0705309
0.34	18.37	48.06	50.95	-0.00795009	0.0114051	-0.00740477	0.457176	0.522305	1.92104	0.413323	0.182767	0.180266	-1.37043e-16	-1.28795e-12	2.95295e-12	-1.3725e-11	0.457176	0.522305	0.162416	0.0811871
0.36	18.62	47.64	55.29	0.00458891	-0.00526305	0.00309495	0.39113	0.561034	1.80223	0.573572	0.314063	0.237028	-9.1073e-18	1.71439e-15	-4.16065e-15	1.30573e-14	0.39113	0.561034	0.158028	0.0789974
0.38	18.46	49.86	60	0.00638301	-0.00620731	0.00334521	0.340809	0.617083	1.68751	0.783502	0.549478	0.313374	-6.28837e-17	9.78384e-16	-2.55643e-15	5.42578e-15	0.340809	0.617083	0.145509	0.0799169
0.4	19.88	56.21	63.5	-0.0066249	0.00724684	-0.00416172	0.376844	0.654267	1.77213	0.710039	0.471358	0.331153	-5.37764e-17	-2.56956e-17	-2.14495e-17	-2.2203e-17	0.376844	0.654267	0.138293	0.0986227
0.42	22.33	59.65	65.62	-0.00633118	0.00796355	-0.00489041	0.418662	0.671292	1.85549	0.61432	0.376687	0.321549	6.33174e-17	9.07044e-16	-1.65873e-15	5.1131e-15	0.418662	0.671292	0.138057	0.118039
0.44	23.06	60.86	68.6	-0.00169838	0.00203033	-0.00121796	0.403544	0.699585	1.82698	0.67989	0.449948	0.359795	-2.97071e-17	-1.58565e-17	-7.18751e-18	-2.438e-17	0.403544	0.699585	0.132183	0.124218
0.46	22.09	63.79	72.52	-0.00848639	0.00893615	-0.00503109	0.365262	0.749665	1.74636	0.854832	0.672673	0.443994	2.34188e-17	-1.25247e-15	2.44689e-15	-4.97143e-15	0.365262	0.749665	0.115154	0.125959
0.48	24.27	64.1	76.01	0.00752694	-0.00780534	0.00435865	0.36058	0.776845	1.73558	0.903961	0.747796	0.480713	-1.02349e-16	2.17383e-16	-5.67993e-16	9.77306e-16	0.36058	0.776845	0.107114	0.134455
0.5	26.17	66.66	81.01	0.0166762	-0.0168323	0.00926244	0.352299	0.82519	1.71595	0.99563	0.898274	0.550116	0	2.84611e-13	-5.15105e-13	8.87775e-13	0.352299	0.82519	0.0874051	0.145357
0.52	27.29	69.95	84.98	0.0167618	-0.0168108	0.00921791	0.350329	0.866667	1.71118	1.05479	1.00596	0.608794	-1.45717e-16	3.04276e-13	-5.27429e-13	8.55502e-13	0.350329	0.866667	0.0693331	0.157882
0.54	28.35	71.67	86.29	0.0164784	-0.0172462	0.00967823	0.3634	0.876367	1.7421	1.00738	0.931964	0.608759	-1.04083e-16	1.87189e-13	-3.09921e-13	5.35854e-13	0.3634	0.876367	0.0667618	0.171975
0.56	27.76	75.58	88.07	0.00157071	-0.0016507	0.000928383	0.364662	0.90333	1.74499	1.03272	0.98102	0.645354	9.24824e-17	5.70019e-17	4.93681e-17	6.13472e-18	0.364662	0.90333	0.0541354	0.18447
0.58	30.05	76.82	88.76	0.00645498	-0.00750824	0.0044456	0.395357	0.90043	1.8108	0.904694	0.786436	0.605604	1.35308e-16	-8.63025e-17	3.04636e-16	-4.60184e-16	0.395357	0.90043	0.0577506	0.206475
0.6	33.49	76.9	89.59	0.0176341	-0.0238235	0.015092	0.439688	0.891791	1.89245	0.752795	0.587006	0.54418	2.08167e-17	4.95115e-12	-6.84918e-12	1.72182e-11	0.439688	0.891791	0.0649254	0.235266
0.62	34.36	79.91	91.12	0.011823	-0.0167408	0.0108123	0.453383	0.910162	1.91499	0.730267	0.566498	0.551548	0	2.13755e-14	-2.83018e-14	7.42163e-14	0.453383	0.910162	0.0556993	0.255844
0.64	33.82	83.51	92.5	0.000431891	-0.000600577	0.00038505	0.448119	0.935201	1.90646	0.765013	0.615644	0.588457	-1.0842e-17	1.69813e-17	-3.34192e-17	6.91105e-17	0.448119	0.935201	0.0414711	0.268212
0.66	34.62	84.64	93.38	0.000438079	-0.000627274	0.000406953	0.456628	0.943199	1.92017	0.74788	0.597772	0.588498	1.57751e-17	4.43845e-18	1.03832e-17	-5.56559e-18	0.456628	0.943199	0.0374886	0.284256
0.68	36.66	85.76	94.39	0.00350244	-0.00549676	0.00369335	0.483059	0.947772	1.96017	0.684587	0.526812	0.563982	4.16334e-17	1.69678e-17	1.82932e-17	8.43651e-18	0.483059	0.947772	0.0355153	0.311324
0.7	39.32	87.95	95.46	0.00345598	-0.00627214	0.00442945	0.524274	0.95522	2.01581	0.602938	0.442886	0.52924	4.59702e-17	2.48553e-17	1.01529e-17	4.22994e-17	0.524274	0.95522	0.0313463	0.350558
0.72	39.75	89.49	97.47	0.0038974	-0.00688539	0.0048203	0.516697	0.975442	2.00613	0.630552	0.477261	0.559852	-9.80119e-17	-8.3592e-17	1.05954e-17	-1.89148e-16	0.516697	0.975442	0.0176821	0.362885
0.74	39.59	89.99	99.49	0.00682442	-0.0112278	0.00767278	0.496529	0.994162	1.97919	0.686172	0.543309	0.604479	-1.21431e-17	-4.15141e-16	4.60332e-16	-1.34547e-15	0.496529	0.994162	0.00431978	0.365286
0.76	41.03	90.74	99.46	0.00647105	-0.0116882	0.00824171	0.522933	0.991671	2.01412	0.628572	0.480086	0.571846	-1.2837e-16	-2.99457e-16	2.21391e-16	-9.13622e-16	0.522933	0.991671	0.00633022	0.394119
0.78	42.89	92.09	98.22	0.00209594	-0.00448524	0.00332629	0.570149	0.982155	2.06991	0.541479	0.390062	0.514193	0	-2.35814e-18	2.48328e-18	-9.49281e-18	0.570149	0.982155	0.013919	0.43678
0.8	43.11	93.1	98.51	0.000263472	-0.0005695	0.000423505	0.572912	0.987887	2.07294	0.540477	0.390628	0.517635	-4.35849e-17	-1.52974e-17	-1.69185e-17	-1.57525e-17	0.572912	0.987887	0.00969036	0.452778

[truncated: 34 more sheets: Table S3, Table S4, Table S5, Table S6, Table S7, Table S8, Table S9, Table S10, Table S11, Table S12, Table S13, Table S14, Table S15, Table S16, Table S17, Table S3 (2), Table S4 (2), Table S5 (2), Table S6 (2), Table S7 (2) …]
